# Supplementary material for: A simple, cost-effective colorimetric assay for aluminum ions via complexation with the flavonoid rutin
Source: PeerJ journal article supplement (doi:10.7717/peerj-achem.19), 2022-10-27
Supplement: Supplemental_Data_Final_achem-19_StaffRL.xlsx [file Supplemental_Data_Final_achem-19_StaffRL.xlsx]

## Sheet: Figure 1
	Aluminum Chelation
	Blank = 295 μL Water + 5 μL DMSO
	[Al3+] (µM)	Blank	0	0.00762939	0.0152588	0.0305176	0.0610352	0.12207	0.244141	0.488281	0.976562	1.95312	3.90625	7.8125	15.625	31.25	62.5	125	250	500	1000	2000	4000	8000	16000
	Wavelength (nm)	Absorbance
	300	0.337	0.6658	0.6683	0.6758	0.6744	0.6701	0.6865	0.6643	0.6713	0.6632	0.6887	0.663	0.6751	0.6866	0.6778	0.6568	0.6321	0.6469	0.6556	0.638	0.622	0.6374	0.6373	0.6255
	305	0.199	0.5302	0.5345	0.5406	0.5364	0.5352	0.55	0.5321	0.5391	0.5289	0.5447	0.5312	0.5376	0.5425	0.523	0.4996	0.4839	0.483	0.4869	0.4682	0.4584	0.4662	0.4645	0.4553
	310	0.1429	0.4833	0.4901	0.4925	0.489	0.4885	0.5006	0.4859	0.4912	0.4819	0.4936	0.4798	0.4826	0.4783	0.4527	0.4214	0.3992	0.3915	0.3885	0.3686	0.3598	0.3634	0.3624	0.3507
	315	0.1231	0.4781	0.4851	0.4883	0.4833	0.4833	0.4948	0.4799	0.4854	0.475	0.4862	0.4721	0.4741	0.462	0.4297	0.3939	0.3702	0.3555	0.3452	0.3262	0.3185	0.3181	0.3158	0.307
	320	0.1095	0.4863	0.4944	0.4969	0.4914	0.4933	0.5044	0.489	0.4943	0.4834	0.4932	0.4774	0.4811	0.4624	0.4233	0.3872	0.362	0.3426	0.3315	0.3122	0.3036	0.3025	0.2994	0.2912
	325	0.0965	0.5044	0.5144	0.5167	0.5098	0.5117	0.5239	0.5086	0.5131	0.5014	0.5109	0.4931	0.4969	0.4723	0.4307	0.3929	0.3673	0.345	0.3314	0.3116	0.3036	0.2997	0.2965	0.2879
	330	0.0871	0.5267	0.5367	0.5386	0.5325	0.5339	0.5486	0.5316	0.5347	0.5242	0.5325	0.5129	0.5193	0.4919	0.4454	0.4084	0.3802	0.3534	0.3382	0.3163	0.3085	0.3027	0.2969	0.2895
	335	0.079	0.556	0.5669	0.5708	0.5627	0.5645	0.5825	0.5611	0.5663	0.5533	0.5619	0.54	0.548	0.5182	0.4693	0.4322	0.4016	0.3699	0.3512	0.3283	0.3182	0.3103	0.3013	0.2934
	340	0.0679	0.5788	0.5902	0.5938	0.5858	0.5882	0.6081	0.585	0.5897	0.5758	0.5849	0.5626	0.5716	0.5393	0.4862	0.4505	0.4186	0.3819	0.3594	0.3353	0.3232	0.3128	0.3017	0.2938
	345	0.0609	0.6017	0.6144	0.6177	0.6096	0.6119	0.6363	0.6084	0.6138	0.5987	0.6084	0.5837	0.5945	0.5631	0.5089	0.4726	0.4391	0.3982	0.3733	0.3461	0.3337	0.3195	0.307	0.2984
	350	0.0566	0.6187	0.6307	0.6342	0.6245	0.6288	0.6558	0.6242	0.6302	0.6145	0.624	0.5982	0.61	0.5792	0.524	0.49	0.4568	0.4116	0.3859	0.3582	0.3432	0.328	0.3139	0.3055
	355	0.053	0.6236	0.6365	0.6384	0.6295	0.6337	0.665	0.6286	0.636	0.6191	0.6295	0.6031	0.6162	0.5891	0.5358	0.5054	0.4725	0.4285	0.4037	0.3742	0.359	0.3441	0.3298	0.3202
	360	0.0503	0.6085	0.6204	0.6215	0.6134	0.6175	0.6517	0.6128	0.6205	0.6042	0.6148	0.5886	0.6034	0.5832	0.535	0.5089	0.4806	0.4397	0.417	0.3871	0.3726	0.3578	0.3432	0.3331
	365	0.0476	0.5771	0.5887	0.5889	0.5803	0.5855	0.6212	0.5805	0.5885	0.5731	0.5839	0.5613	0.5747	0.5659	0.5241	0.5048	0.4827	0.4465	0.4273	0.3983	0.3847	0.3709	0.3575	0.3459
	370	0.0473	0.5305	0.5417	0.5409	0.5322	0.5385	0.5728	0.5333	0.541	0.5259	0.5381	0.5206	0.5342	0.5407	0.5088	0.4995	0.485	0.4574	0.4445	0.4156	0.4032	0.3932	0.3807	0.3678
	375	0.0444	0.4577	0.4674	0.4639	0.4581	0.4644	0.4985	0.4604	0.4676	0.4549	0.4672	0.457	0.4683	0.4984	0.4802	0.4848	0.4846	0.4674	0.4641	0.4377	0.428	0.4192	0.4094	0.3954
	380	0.0413	0.3779	0.3853	0.3819	0.3775	0.3835	0.4144	0.3806	0.3874	0.3768	0.3886	0.3855	0.3967	0.45	0.4481	0.4698	0.4824	0.4783	0.4857	0.461	0.4549	0.4488	0.4427	0.426
	385	0.0424	0.3075	0.3136	0.3094	0.3071	0.3116	0.3382	0.3095	0.3167	0.3066	0.321	0.324	0.335	0.4099	0.422	0.4604	0.4872	0.4968	0.513	0.4922	0.4899	0.4865	0.4835	0.4661
	390	0.0413	0.2378	0.242	0.2371	0.2369	0.24	0.2629	0.2403	0.246	0.2394	0.2527	0.2626	0.2722	0.3673	0.3935	0.4477	0.4879	0.5113	0.5417	0.5234	0.5261	0.5265	0.5261	0.5076
	395	0.042	0.1778	0.1793	0.1753	0.1761	0.1786	0.196	0.1789	0.1843	0.1811	0.1932	0.2079	0.2167	0.3266	0.3647	0.4328	0.4872	0.5246	0.5673	0.5556	0.5616	0.568	0.572	0.5518
	400	0.04	0.1321	0.1342	0.1312	0.1307	0.1329	0.1471	0.1354	0.1399	0.1386	0.1503	0.1678	0.1758	0.2936	0.3395	0.4167	0.4815	0.5325	0.5888	0.5805	0.593	0.604	0.6144	0.5919
	405	0.0378	0.0951	0.0969	0.0941	0.0941	0.0965	0.1045	0.0988	0.1027	0.1019	0.1133	0.1332	0.1401	0.2605	0.3104	0.3936	0.4667	0.5296	0.6011	0.5985	0.6179	0.6343	0.6521	0.6275
	410	0.0386	0.0759	0.0767	0.0738	0.0743	0.076	0.0821	0.0784	0.0811	0.0818	0.0915	0.1122	0.1178	0.2368	0.2868	0.3696	0.4471	0.5202	0.6016	0.6048	0.6312	0.6535	0.6775	0.6511
	415	0.0386	0.062	0.0629	0.0605	0.0615	0.0628	0.0654	0.0649	0.0679	0.0672	0.0765	0.0954	0.1017	0.2108	0.2596	0.3395	0.4218	0.501	0.5959	0.6032	0.6361	0.6657	0.6956	0.6681
	420	0.0351	0.0486	0.049	0.0489	0.0485	0.0492	0.0496	0.0529	0.0539	0.0544	0.0625	0.0799	0.0834	0.1814	0.2252	0.3	0.3819	0.4668	0.5713	0.5824	0.622	0.6585	0.6943	0.6646
	425	0.0359	0.045	0.0446	0.0447	0.0453	0.0449	0.0457	0.0473	0.0497	0.0505	0.0563	0.0725	0.0732	0.1617	0.1997	0.2692	0.349	0.4359	0.5439	0.5602	0.6024	0.6407	0.6816	0.6527
	430	0.0376	0.0447	0.0452	0.0452	0.0458	0.0458	0.0464	0.0482	0.0499	0.0488	0.0554	0.0699	0.0707	0.1483	0.1805	0.243	0.3193	0.4054	0.5179	0.5325	0.5767	0.6195	0.6599	0.6325
	435	0.0372	0.0425	0.0438	0.0442	0.0453	0.0451	0.0444	0.0463	0.0489	0.0458	0.0506	0.0651	0.066	0.1313	0.1567	0.2099	0.2828	0.3635	0.4742	0.4878	0.5347	0.5778	0.6177	0.591
	440	0.0346	0.039	0.0384	0.0408	0.0408	0.0401	0.0399	0.0424	0.044	0.0418	0.0461	0.0572	0.0566	0.1122	0.1312	0.1758	0.2404	0.3144	0.4166	0.4312	0.4744	0.5156	0.5534	0.5299
	445	0.0359	0.0396	0.039	0.041	0.0408	0.0401	0.0402	0.0412	0.0431	0.0419	0.0447	0.0544	0.0526	0.0997	0.1129	0.1503	0.206	0.2714	0.3612	0.3748	0.4143	0.4506	0.4851	0.4647
	450	0.0348	0.0379	0.037	0.0389	0.0396	0.038	0.0378	0.0401	0.0404	0.0397	0.0426	0.0502	0.0473	0.0887	0.096	0.1253	0.1727	0.229	0.3041	0.3163	0.3507	0.3812	0.411	0.3941
	455	0.0356	0.0385	0.0375	0.0392	0.0397	0.0384	0.0391	0.0406	0.0406	0.0402	0.0422	0.05	0.0458	0.0811	0.0839	0.1063	0.1444	0.1884	0.2504	0.2588	0.2872	0.3127	0.3376	0.3232
	460	0.0358	0.0379	0.0376	0.039	0.04	0.0383	0.0388	0.04	0.0409	0.0396	0.0413	0.048	0.0443	0.0747	0.0728	0.0889	0.1178	0.1488	0.1971	0.201	0.2231	0.2419	0.259	0.2499
	465	0.0357	0.0381	0.0381	0.0399	0.0406	0.0387	0.0386	0.0412	0.0415	0.0385	0.0402	0.0486	0.0453	0.0707	0.0661	0.0743	0.0988	0.1214	0.1593	0.159	0.1771	0.1911	0.2033	0.1976
	470	0.0353	0.0378	0.0399	0.0413	0.0418	0.0405	0.0414	0.0415	0.0429	0.0395	0.0418	0.049	0.0481	0.071	0.0623	0.068	0.0856	0.0993	0.1283	0.1251	0.1389	0.1491	0.156	0.1538
	475	0.0356	0.0376	0.0393	0.0406	0.042	0.0398	0.0398	0.0412	0.0425	0.0373	0.0412	0.0476	0.0456	0.066	0.0556	0.0602	0.0721	0.0794	0.0988	0.0951	0.107	0.1142	0.1176	0.1157
	480	0.0351	0.0361	0.0382	0.0397	0.0405	0.0396	0.0388	0.0401	0.0406	0.0378	0.0397	0.0456	0.0442	0.0632	0.0497	0.0518	0.0614	0.065	0.0773	0.0734	0.0822	0.087	0.089	0.0873
	485	0.034	0.0346	0.034	0.0351	0.036	0.0355	0.0352	0.0353	0.0372	0.0354	0.036	0.0409	0.037	0.0552	0.0424	0.042	0.0498	0.0518	0.0579	0.0559	0.0612	0.0655	0.0652	0.0633
	490	0.0335	0.0345	0.0355	0.0364	0.0383	0.0354	0.0356	0.0365	0.0379	0.0353	0.0366	0.0417	0.0383	0.0557	0.0427	0.0403	0.0478	0.0471	0.0514	0.0487	0.0533	0.0553	0.0555	0.0545
	495	0.0344	0.0375	0.0369	0.0395	0.0396	0.0374	0.0379	0.0378	0.0393	0.0361	0.0372	0.0426	0.0405	0.0575	0.0413	0.0401	0.0468	0.0449	0.0479	0.0441	0.047	0.0487	0.0485	0.0488
	500	0.0356	0.0374	0.0377	0.0388	0.0391	0.0385	0.0376	0.038	0.0404	0.0368	0.038	0.0433	0.0401	0.0573	0.0408	0.0402	0.0448	0.0425	0.0449	0.0408	0.0443	0.0449	0.0443	0.0436
	505	0.0347	0.0368	0.0355	0.0382	0.0387	0.0372	0.0364	0.0383	0.0392	0.0364	0.0383	0.0421	0.0397	0.0553	0.0398	0.0384	0.0431	0.0404	0.0409	0.038	0.0402	0.0401	0.0399	0.0401
	510	0.0333	0.0361	0.0347	0.0357	0.0372	0.0365	0.0365	0.0367	0.0374	0.0345	0.0366	0.0411	0.0396	0.0544	0.0385	0.0373	0.0414	0.0382	0.0393	0.0352	0.0375	0.0372	0.0361	0.0379
	515	0.0342	0.0344	0.0349	0.0357	0.0356	0.0344	0.0339	0.0349	0.0366	0.035	0.035	0.0396	0.0376	0.0515	0.0369	0.0361	0.0396	0.0369	0.0355	0.0326	0.0344	0.035	0.0341	0.035
	520	0.0343	0.0349	0.0348	0.0363	0.0371	0.0353	0.0362	0.036	0.0368	0.0353	0.0352	0.0402	0.0378	0.0524	0.0381	0.0355	0.0396	0.0367	0.0353	0.0341	0.0355	0.036	0.0337	0.0336
	525	0.0342	0.0357	0.0367	0.0368	0.037	0.0361	0.0357	0.0365	0.0394	0.0371	0.0375	0.0429	0.0396	0.0536	0.0397	0.0373	0.0411	0.0383	0.0372	0.0356	0.0359	0.0369	0.0359	0.0357
	530	0.0323	0.0321	0.0307	0.0326	0.0333	0.0321	0.0323	0.0329	0.034	0.0327	0.0326	0.037	0.0336	0.0487	0.0351	0.0321	0.0354	0.0339	0.0321	0.0304	0.0321	0.0321	0.0308	0.0292
	535	0.0339	0.0352	0.0342	0.035	0.0357	0.0341	0.0344	0.0346	0.0359	0.0347	0.0341	0.0391	0.0365	0.0512	0.0363	0.0348	0.0381	0.0352	0.0332	0.0322	0.0332	0.0344	0.0324	0.0328
	540	0.034	0.0371	0.0364	0.0369	0.037	0.0357	0.0361	0.0354	0.0381	0.0354	0.0371	0.0405	0.0387	0.0525	0.0378	0.0373	0.0401	0.0368	0.0371	0.0334	0.0338	0.0353	0.0336	0.0346
	545	0.0337	0.0346	0.0341	0.0344	0.0348	0.0337	0.0349	0.0339	0.0368	0.0341	0.0348	0.039	0.0372	0.0512	0.0369	0.0345	0.0378	0.0358	0.0343	0.0326	0.0336	0.0336	0.0317	0.033
	550	0.0344	0.0358	0.0358	0.0359	0.036	0.035	0.0349	0.0353	0.0369	0.0353	0.035	0.0396	0.0375	0.0508	0.0376	0.0353	0.0384	0.0375	0.0352	0.0328	0.0337	0.0343	0.0328	0.0331
	555	0.0343	0.0365	0.0359	0.0362	0.037	0.0353	0.0341	0.0355	0.037	0.0352	0.0354	0.0394	0.0386	0.0515	0.037	0.0358	0.0391	0.0361	0.0355	0.0326	0.0341	0.0341	0.0333	0.0339
	560	0.0352	0.0368	0.0346	0.0357	0.0357	0.0353	0.035	0.0355	0.0369	0.0354	0.0356	0.0395	0.0372	0.0518	0.0377	0.0359	0.0385	0.0359	0.0345	0.0324	0.034	0.0346	0.0334	0.0338
	565	0.0337	0.0354	0.0346	0.0362	0.0358	0.0343	0.0345	0.0348	0.0368	0.0353	0.0354	0.04	0.038	0.0516	0.0385	0.0355	0.0391	0.0366	0.034	0.0327	0.0334	0.0343	0.0333	0.0331
	570	0.0332	0.0363	0.0351	0.0354	0.0364	0.0347	0.0343	0.0338	0.0371	0.035	0.0353	0.0393	0.0377	0.0509	0.0377	0.0352	0.0384	0.0361	0.0353	0.0331	0.0341	0.0337	0.0334	0.0339
	575	0.0341	0.0357	0.0338	0.0357	0.0365	0.0343	0.0347	0.035	0.0355	0.0344	0.0345	0.0388	0.0369	0.0503	0.0363	0.0348	0.0378	0.0363	0.0346	0.032	0.033	0.0345	0.0324	0.0331
	580	0.0354	0.0359	0.0353	0.0375	0.0368	0.0356	0.0348	0.0346	0.0365	0.0348	0.0353	0.0381	0.0375	0.0515	0.0363	0.0352	0.0364	0.0371	0.0344	0.0344	0.034	0.0349	0.0329	0.0343
	585	0.0355	0.0375	0.0368	0.0376	0.0376	0.0354	0.0358	0.0354	0.0391	0.0358	0.0367	0.0396	0.0373	0.0514	0.0374	0.0365	0.039	0.0358	0.0363	0.0332	0.0328	0.0357	0.0346	0.0348
	590	0.0355	0.0367	0.036	0.0369	0.0367	0.0363	0.0361	0.0367	0.038	0.0356	0.0363	0.0391	0.0363	0.0524	0.0376	0.0359	0.0386	0.0352	0.0361	0.0347	0.0332	0.0357	0.0339	0.0343
	595	0.0337	0.0358	0.0355	0.0365	0.0357	0.035	0.0349	0.0334	0.0375	0.0352	0.0361	0.0387	0.037	0.0512	0.0375	0.0358	0.038	0.0355	0.0362	0.0334	0.0321	0.0352	0.0343	0.0327
	600	0.0341	0.0352	0.0344	0.0349	0.0352	0.0348	0.0356	0.0338	0.0374	0.0352	0.0339	0.038	0.0368	0.051	0.0363	0.0349	0.0373	0.0346	0.036	0.0327	0.032	0.034	0.0317	0.0329
	605	0.0349	0.0368	0.0349	0.0358	0.0363	0.0356	0.0354	0.0348	0.0375	0.0356	0.0355	0.0387	0.0365	0.0517	0.0367	0.0349	0.0375	0.0358	0.0364	0.0337	0.0332	0.0354	0.0327	0.0342
	610	0.0342	0.0355	0.0333	0.0348	0.0346	0.0356	0.0355	0.0352	0.0361	0.0338	0.0341	0.037	0.0352	0.0507	0.0368	0.0336	0.0365	0.0344	0.0342	0.0331	0.0326	0.033	0.0317	0.0325
	615	0.0344	0.037	0.0347	0.0356	0.0358	0.0355	0.0361	0.0347	0.0374	0.0349	0.0356	0.0393	0.0372	0.052	0.0374	0.0348	0.0372	0.0348	0.0362	0.034	0.0325	0.0345	0.033	0.0334
	620	0.0348	0.0371	0.0353	0.0363	0.0361	0.0357	0.0353	0.0343	0.0369	0.0349	0.035	0.0386	0.0384	0.0512	0.0352	0.0345	0.0373	0.0341	0.0356	0.0337	0.0329	0.0348	0.0339	0.0333
	625	0.0336	0.036	0.0357	0.0354	0.035	0.0349	0.0345	0.0338	0.0378	0.0344	0.0352	0.0379	0.0372	0.0506	0.0353	0.0331	0.0374	0.0342	0.0359	0.0326	0.0322	0.035	0.0324	0.0329
	630	0.0329	0.0345	0.0319	0.0339	0.0327	0.0328	0.0338	0.0334	0.0354	0.0325	0.0339	0.0366	0.0348	0.0493	0.0347	0.0332	0.0356	0.0327	0.0334	0.0328	0.0323	0.0319	0.0316	0.032
	635	0.0328	0.0355	0.0341	0.0347	0.0341	0.0337	0.0343	0.0325	0.0364	0.033	0.0342	0.0369	0.0359	0.0501	0.0355	0.0326	0.0359	0.0342	0.0349	0.0332	0.0317	0.0341	0.0332	0.0332
	640	0.0335	0.0357	0.0329	0.034	0.0341	0.0346	0.0349	0.0337	0.0362	0.0336	0.0348	0.038	0.0356	0.0503	0.0361	0.0344	0.0365	0.0343	0.0349	0.0329	0.0317	0.0331	0.0325	0.0331
	645	0.0332	0.036	0.0344	0.0358	0.0345	0.0346	0.0353	0.0342	0.0364	0.0343	0.0355	0.0376	0.0356	0.0502	0.0351	0.0333	0.0372	0.0343	0.0345	0.0329	0.0322	0.034	0.0333	0.033
	650	0.0342	0.0354	0.034	0.0354	0.0347	0.0337	0.0339	0.0336	0.0366	0.0338	0.0348	0.0388	0.0374	0.0505	0.0348	0.0331	0.0371	0.0337	0.0352	0.0334	0.0329	0.0342	0.033	0.0342
	655	0.0317	0.0331	0.0331	0.0329	0.0328	0.0325	0.0325	0.0319	0.0339	0.0318	0.0337	0.0372	0.0345	0.0475	0.0334	0.032	0.0348	0.0327	0.0328	0.0315	0.0316	0.0318	0.0313	0.032
	660	0.0313	0.033	0.0311	0.0319	0.0316	0.0335	0.0327	0.032	0.0334	0.032	0.0332	0.0357	0.0334	0.0476	0.0344	0.0321	0.035	0.0324	0.0321	0.0306	0.0308	0.0323	0.0303	0.0316
	665	0.0332	0.0346	0.0326	0.0342	0.0335	0.0343	0.0345	0.0343	0.0346	0.0333	0.0343	0.0373	0.035	0.0492	0.0357	0.0336	0.0371	0.0341	0.0335	0.0324	0.0319	0.033	0.0323	0.0325
	670	0.0327	0.0336	0.0327	0.0341	0.0347	0.0338	0.034	0.0326	0.0355	0.0332	0.0329	0.0383	0.0364	0.0492	0.0347	0.0336	0.0371	0.035	0.0337	0.0323	0.0317	0.0341	0.0335	0.0333
	675	0.0311	0.0336	0.0313	0.0326	0.0328	0.032	0.0333	0.0323	0.0346	0.0329	0.0336	0.0371	0.0346	0.0496	0.0345	0.0331	0.0355	0.0332	0.0335	0.0319	0.0311	0.0332	0.0323	0.0323
	680	0.0314	0.0324	0.0308	0.0317	0.0329	0.0329	0.0337	0.0327	0.035	0.0326	0.0336	0.0371	0.0355	0.0484	0.0355	0.033	0.0359	0.0338	0.0345	0.0324	0.0317	0.0333	0.033	0.0332
	685	0.033	0.0334	0.0331	0.0334	0.0352	0.0344	0.0346	0.0332	0.0358	0.0344	0.0348	0.0372	0.0353	0.0496	0.0366	0.0348	0.0385	0.0337	0.0344	0.033	0.032	0.0333	0.0324	0.0336
	690	0.0308	0.0335	0.0325	0.0327	0.0338	0.0341	0.033	0.0326	0.0345	0.0342	0.0345	0.039	0.0357	0.0484	0.0349	0.034	0.037	0.0332	0.0334	0.0323	0.0328	0.0339	0.0328	0.0324
	695	0.033	0.0333	0.0314	0.0323	0.0346	0.034	0.0338	0.0327	0.0342	0.0349	0.034	0.0381	0.0364	0.0498	0.0352	0.0319	0.0382	0.0346	0.0346	0.0331	0.032	0.0336	0.0326	0.0333
	700	0.0311	0.0321	0.0289	0.031	0.0328	0.0315	0.0326	0.0315	0.0318	0.0313	0.0313	0.0342	0.0315	0.0479	0.0334	0.0324	0.0343	0.0327	0.0321	0.0307	0.0306	0.0332	0.0306	0.0315
	705	0.0327	0.0328	0.0296	0.0321	0.0328	0.0327	0.0332	0.0327	0.0339	0.0311	0.0331	0.0353	0.0326	0.0491	0.0336	0.0328	0.0348	0.034	0.032	0.0322	0.031	0.0321	0.0307	0.0313
	710	0.0322	0.0339	0.0317	0.033	0.0343	0.0344	0.0341	0.0334	0.0353	0.0343	0.035	0.0371	0.0363	0.049	0.0357	0.0342	0.0376	0.0339	0.035	0.0325	0.0332	0.0337	0.0333	0.0338
	715	0.0337	0.0354	0.0344	0.0352	0.0383	0.0372	0.0362	0.036	0.0366	0.0367	0.0371	0.0389	0.0382	0.0504	0.0372	0.0362	0.0392	0.0359	0.0369	0.0348	0.0336	0.0356	0.0359	0.0363
	720	0.0338	0.0363	0.0337	0.0347	0.036	0.0368	0.0358	0.035	0.0385	0.0354	0.0365	0.0386	0.037	0.0511	0.0371	0.0347	0.0386	0.0365	0.0366	0.0345	0.0344	0.0354	0.0355	0.0363
	725	0.0342	0.0362	0.0348	0.0355	0.0368	0.0377	0.0354	0.0357	0.0361	0.0369	0.0366	0.0391	0.0378	0.0519	0.0374	0.0361	0.039	0.0356	0.0363	0.0356	0.0347	0.0361	0.0357	0.036
	730	0.0359	0.0362	0.0353	0.0365	0.038	0.0387	0.0384	0.0361	0.0374	0.0385	0.0379	0.0406	0.039	0.0536	0.0403	0.0377	0.0415	0.0385	0.038	0.0369	0.0362	0.0379	0.0377	0.0371
	735	0.0368	0.0369	0.0358	0.0362	0.038	0.0378	0.0389	0.0371	0.0372	0.0385	0.037	0.0417	0.0384	0.0553	0.0401	0.0383	0.0404	0.0382	0.0392	0.0375	0.0362	0.039	0.0367	0.0372
	740	0.0382	0.0375	0.0363	0.0371	0.0383	0.0393	0.0402	0.0382	0.0387	0.0393	0.0392	0.0429	0.0397	0.0557	0.0405	0.0396	0.0421	0.04	0.0404	0.038	0.0377	0.0387	0.0378	0.039
	745	0.0392	0.0391	0.037	0.0391	0.0401	0.0407	0.0403	0.0393	0.041	0.04	0.0403	0.0439	0.0411	0.0563	0.0407	0.0406	0.0433	0.0415	0.0405	0.039	0.0384	0.0405	0.0402	0.039
	750	0.0387	0.0391	0.0372	0.0397	0.0411	0.0413	0.0411	0.0394	0.0401	0.0401	0.0407	0.0435	0.0407	0.0568	0.0419	0.0408	0.0435	0.0407	0.0405	0.04	0.0393	0.0408	0.0398	0.0401
	755	0.0375	0.0387	0.0371	0.0388	0.0396	0.0405	0.0409	0.0388	0.0387	0.0399	0.041	0.0426	0.0415	0.056	0.0416	0.04	0.0426	0.0401	0.0398	0.0401	0.0374	0.041	0.0398	0.0404
	760	0.0387	0.0402	0.0384	0.0402	0.041	0.0416	0.0419	0.0407	0.0399	0.041	0.0416	0.0437	0.0409	0.0574	0.043	0.0411	0.044	0.0413	0.0412	0.04	0.04	0.0413	0.0403	0.041
	765	0.0378	0.0383	0.0362	0.0384	0.0396	0.0416	0.0405	0.0384	0.0381	0.0401	0.0392	0.0425	0.0407	0.0569	0.0412	0.0399	0.0427	0.0397	0.0413	0.0391	0.037	0.0408	0.0391	0.0398
	770	0.0389	0.0383	0.0364	0.038	0.0395	0.0391	0.0391	0.0387	0.0377	0.0394	0.0389	0.0411	0.0402	0.0559	0.041	0.0398	0.0411	0.0403	0.0395	0.0376	0.0365	0.0407	0.0387	0.0396
	775	0.0374	0.0395	0.0369	0.0387	0.0404	0.0406	0.0402	0.0389	0.0397	0.0411	0.0403	0.0425	0.0424	0.0566	0.0413	0.0411	0.0423	0.0421	0.0411	0.0399	0.0382	0.0425	0.0406	0.0401
	780	0.0358	0.0382	0.0363	0.0381	0.0382	0.0384	0.0403	0.0385	0.0382	0.0394	0.0385	0.0412	0.0398	0.0544	0.0409	0.0413	0.0403	0.0394	0.0398	0.0382	0.037	0.0407	0.0382	0.0408
	785	0.037	0.0388	0.0365	0.0383	0.0397	0.0399	0.0409	0.0397	0.0388	0.04	0.0399	0.0432	0.0408	0.0567	0.0414	0.0412	0.0424	0.0403	0.0412	0.0399	0.0379	0.0409	0.0398	0.0403
	790	0.0367	0.0383	0.0354	0.0369	0.0389	0.039	0.0396	0.0372	0.0372	0.0382	0.0394	0.0402	0.0391	0.0559	0.0415	0.039	0.0399	0.0393	0.0396	0.0388	0.0361	0.0392	0.0384	0.039
	795	0.0353	0.0369	0.0358	0.037	0.0385	0.039	0.0395	0.0375	0.0377	0.0393	0.0391	0.0405	0.039	0.0554	0.0418	0.0399	0.0415	0.038	0.0392	0.0384	0.0365	0.04	0.0392	0.0394
	800	0.0365	0.0371	0.0347	0.0366	0.039	0.039	0.04	0.0375	0.0366	0.0393	0.0392	0.0396	0.0406	0.0547	0.0406	0.0406	0.0412	0.0388	0.0399	0.0391	0.0366	0.0396	0.0382	0.0392

## Sheet: Figure 2
	Blank = 295 μL Water + 5 μL DMSO		Aluminum (μM) Calibration Curve 1						Blank = 295 μL Water + 5 μL DMSO		Aluminum (μM) Calibration Curve 2						Blank = 295 μL Water + 5 μL DMSO		Aluminum (μM) Calibration Curve 3
	Wavelength (nm)	Blank 1	0	1	2	4	8		Wavelength (nm)	Blank 2	0	1	2	4	8		Wavelength (nm)	Blank 3	0	1	2	4	8
	300	0.2859	1.4437	1.4561	1.4761	1.48	1.441		300	0.2836	1.5105	1.4651	1.4716	1.4739	1.4479		300	0.2774	1.4895	1.4625	1.4586	1.4972	1.46
	305	0.1826	1.3846	1.3991	1.4115	1.4104	1.3663		305	0.1821	1.4525	1.4075	1.4101	1.4059	1.3759		305	0.1789	1.4338	1.4028	1.3965	1.4324	1.3851
	310	0.1404	1.398	1.4112	1.4193	1.4144	1.3634		310	0.1415	1.4677	1.4211	1.4212	1.4107	1.3753		310	0.1371	1.4485	1.413	1.4059	1.4369	1.381
	315	0.1269	1.4451	1.4573	1.4638	1.4571	1.4007		315	0.1266	1.5184	1.4681	1.4667	1.4522	1.4122		315	0.1251	1.499	1.4602	1.4515	1.4811	1.4188
	320	0.1124	1.5242	1.5409	1.5447	1.5353	1.4722		320	0.1123	1.6028	1.5508	1.5485	1.531	1.4867		320	0.1104	1.5828	1.5408	1.5332	1.5637	1.4925
	325	0.101	1.6398	1.6581	1.6588	1.6501	1.5819		325	0.1013	1.7248	1.6696	1.6661	1.6455	1.5973		325	0.1003	1.7058	1.657	1.6471	1.679	1.6016
	330	0.0922	1.7551	1.7742	1.7761	1.7651	1.6939		330	0.0925	1.8449	1.787	1.7835	1.7627	1.711		330	0.0925	1.8238	1.7718	1.7615	1.7974	1.7141
	335	0.0809	1.8917	1.9123	1.9154	1.9037	1.8275		335	0.0807	1.988	1.9244	1.9239	1.9009	1.8464		335	0.0808	1.9655	1.9128	1.8982	1.9397	1.8479
	340	0.0715	2.0031	2.025	2.0288	2.0166	1.9356		340	0.0715	2.1065	2.0377	2.0375	2.0129	1.9568		340	0.0726	2.0791	2.0233	2.0114	2.0539	1.9574
	345	0.0627	2.1045	2.1285	2.13	2.1202	2.0352		345	0.0631	2.2088	2.1395	2.1374	2.114	2.0557		345	0.0644	2.1866	2.1244	2.1117	2.1592	2.0556
	350	0.0596	2.1631	2.1879	2.1925	2.1797	2.0923		350	0.0593	2.2698	2.196	2.1979	2.1736	2.1147		350	0.061	2.2466	2.1853	2.1728	2.2181	2.1158
	355	0.0548	2.1608	2.1851	2.1861	2.1759	2.0896		355	0.0547	2.2515	2.1846	2.1879	2.1675	2.112		355	0.056	2.2439	2.171	2.1781	2.2098	2.1166
	360	0.0527	2.0893	2.1176	2.1143	2.109	2.0265		360	0.0517	2.1791	2.1136	2.1176	2.0998	2.0512		360	0.0517	2.1703	2.1068	2.0969	2.1416	2.048
	365	0.0499	1.9717	1.9922	1.9932	1.9884	1.9126		365	0.0492	2.0567	1.9853	1.997	1.9754	1.9352		365	0.0481	2.0374	1.9816	1.9707	2.0171	1.9358
	370	0.047	1.7408	1.7649	1.7666	1.7668	1.7084		370	0.0455	1.8098	1.7537	1.7667	1.7494	1.7263		370	0.0436	1.7891	1.7501	1.7379	1.7863	1.723
	375	0.0425	1.4724	1.4953	1.5015	1.5058	1.4696		375	0.0424	1.5286	1.4844	1.4954	1.4908	1.4841		375	0.0408	1.5127	1.4793	1.4751	1.5233	1.4814
	380	0.0418	1.204	1.2239	1.2343	1.2477	1.232		380	0.0408	1.2507	1.2174	1.2305	1.2385	1.2472		380	0.0421	1.2388	1.213	1.2154	1.2615	1.2452
	385	0.0376	0.924	0.9398	0.9544	0.9752	0.9835		385	0.0353	0.9638	0.9393	0.9545	0.9741	0.9966		385	0.0368	0.9496	0.9331	0.9401	0.9898	0.9935
	390	0.0368	0.6863	0.7033	0.7179	0.7426	0.7679		390	0.0358	0.7141	0.7023	0.7163	0.7438	0.7816		390	0.0365	0.7045	0.6947	0.706	0.7548	0.7802
	395	0.0389	0.4885	0.5052	0.5214	0.5509	0.5914		395	0.037	0.5124	0.5059	0.5214	0.556	0.6036		395	0.0401	0.5042	0.499	0.5146	0.561	0.6018
	400	0.035	0.3287	0.3452	0.3629	0.3942	0.4449		400	0.0334	0.3439	0.3463	0.3601	0.3991	0.4536		400	0.0355	0.3378	0.3413	0.3562	0.401	0.4538
	405	0.035	0.2146	0.2306	0.2481	0.2815	0.3354		405	0.0333	0.2237	0.2314	0.247	0.2841	0.3412		405	0.0352	0.2208	0.2283	0.2455	0.2864	0.3433
	410	0.034	0.1496	0.1639	0.1817	0.2102	0.2669		410	0.0341	0.1568	0.1644	0.1804	0.216	0.2701		410	0.0349	0.1536	0.1618	0.1789	0.2167	0.2721
	415	0.0334	0.0973	0.1108	0.1261	0.1539	0.2047		415	0.0306	0.1025	0.1105	0.1249	0.1578	0.2077		415	0.0332	0.0991	0.1089	0.1252	0.1568	0.209
	420	0.0355	0.0714	0.0828	0.0962	0.1194	0.1631		420	0.0352	0.0736	0.0812	0.0956	0.1232	0.1655		420	0.0351	0.0722	0.0816	0.0954	0.1222	0.1679
	425	0.0363	0.0583	0.0681	0.0798	0.0999	0.1373		425	0.035	0.0605	0.0669	0.0795	0.1024	0.1385		425	0.0344	0.0588	0.0683	0.079	0.1007	0.1412
	430	0.0342	0.0484	0.0558	0.0654	0.0802	0.1101		430	0.0326	0.0491	0.0561	0.0642	0.0849	0.113		430	0.0329	0.0472	0.0535	0.0634	0.0811	0.1133
	435	0.0345	0.042	0.0482	0.0558	0.0669	0.0897		435	0.033	0.0434	0.0484	0.0549	0.0717	0.0917		435	0.0339	0.0423	0.0469	0.0541	0.069	0.0922
	440	0.0347	0.0392	0.0447	0.0517	0.0599	0.0758		440	0.0336	0.0409	0.044	0.0498	0.0615	0.0772		440	0.0344	0.0406	0.0442	0.0492	0.0596	0.0778
	445	0.0351	0.0382	0.0433	0.0481	0.0536	0.0658		445	0.0352	0.0397	0.0414	0.045	0.0549	0.0652		445	0.0352	0.0393	0.0426	0.0468	0.0534	0.0656
	450	0.0341	0.0366	0.04	0.0432	0.0477	0.0568		450	0.0335	0.0371	0.0388	0.042	0.0478	0.0547		450	0.0348	0.0371	0.039	0.0422	0.0468	0.0566
	455	0.0354	0.0361	0.0389	0.0406	0.0435	0.0492		455	0.0339	0.0366	0.037	0.0397	0.0451	0.0478		455	0.0344	0.0357	0.0369	0.0388	0.0431	0.0492
	460	0.0339	0.0351	0.0375	0.0387	0.0398	0.045		460	0.0339	0.0361	0.0346	0.0369	0.0411	0.0415		460	0.0334	0.0354	0.0351	0.0369	0.0401	0.0436
	465	0.0347	0.0351	0.0372	0.0372	0.0379	0.0421		465	0.0323	0.0356	0.0337	0.0364	0.0398	0.0384		465	0.0336	0.0343	0.035	0.0366	0.0392	0.0391
	470	0.0345	0.034	0.0363	0.0365	0.0355	0.0387		470	0.0313	0.0337	0.0323	0.0339	0.0372	0.0352		470	0.0317	0.0334	0.0325	0.034	0.0369	0.0352
	475	0.0341	0.0341	0.0363	0.0357	0.0359	0.0367		475	0.0309	0.0329	0.0302	0.0332	0.0357	0.0332		475	0.0324	0.032	0.0324	0.0327	0.0358	0.0335
	480	0.0332	0.0321	0.0336	0.0329	0.0341	0.0349		480	0.0303	0.0304	0.0289	0.0321	0.0328	0.032		480	0.0299	0.0301	0.0293	0.0316	0.0343	0.0313
	485	0.0331	0.0335	0.0349	0.0349	0.0362	0.0359		485	0.0332	0.0327	0.0323	0.0337	0.0348	0.0326		485	0.0313	0.0326	0.0334	0.0335	0.0347	0.0331
	490	0.0348	0.0355	0.0363	0.0374	0.0367	0.0364		490	0.0342	0.0345	0.0337	0.0353	0.0356	0.0322		490	0.0335	0.0343	0.034	0.0353	0.0346	0.0343
	495	0.0354	0.0348	0.035	0.0364	0.0373	0.0372		495	0.0334	0.0328	0.031	0.0333	0.0347	0.0318		495	0.032	0.0319	0.0323	0.0338	0.0354	0.033
	500	0.0345	0.0336	0.0352	0.0355	0.0348	0.0359		500	0.0325	0.0313	0.0303	0.0329	0.0335	0.0308		500	0.0315	0.0318	0.0309	0.0326	0.0329	0.032
	505	0.0338	0.0326	0.0353	0.0359	0.0356	0.0363		505	0.0338	0.0316	0.0318	0.0332	0.0339	0.0318		505	0.0313	0.0315	0.0318	0.0324	0.0337	0.0329
	510	0.0345	0.0334	0.0357	0.036	0.0366	0.0359		510	0.0353	0.0332	0.0332	0.0329	0.0348	0.0324		510	0.0329	0.0331	0.0332	0.0325	0.0341	0.0346
	515	0.0342	0.0343	0.0356	0.0358	0.036	0.0359		515	0.0338	0.0326	0.0324	0.0337	0.0337	0.0314		515	0.0313	0.0325	0.0325	0.0327	0.0328	0.0317
	520	0.0346	0.0353	0.0363	0.0367	0.0375	0.0377		520	0.0345	0.0341	0.035	0.0348	0.0353	0.0343		520	0.0332	0.0342	0.0332	0.0349	0.035	0.0344
	525	0.0341	0.0333	0.0339	0.0337	0.0339	0.0346		525	0.0317	0.0315	0.0317	0.0322	0.0333	0.0318		525	0.0307	0.0311	0.0306	0.0317	0.0322	0.0313
	530	0.0356	0.0347	0.0359	0.0371	0.0368	0.0368		530	0.0349	0.0341	0.0336	0.0343	0.036	0.0327		530	0.0335	0.0344	0.0342	0.0345	0.0347	0.034
	535	0.0361	0.036	0.0365	0.0385	0.0379	0.037		535	0.0362	0.035	0.0348	0.036	0.0357	0.0346		535	0.0335	0.0356	0.0357	0.0357	0.035	0.0348
	540	0.0353	0.0347	0.0362	0.0373	0.037	0.0372		540	0.0348	0.0345	0.0332	0.0347	0.035	0.0334		540	0.033	0.035	0.0345	0.0343	0.0339	0.0345
	545	0.0351	0.0342	0.0354	0.0369	0.0366	0.036		545	0.0343	0.0335	0.0341	0.0342	0.0349	0.0325		545	0.034	0.0341	0.0343	0.0337	0.034	0.034
	550	0.0351	0.0347	0.0352	0.0359	0.0362	0.0355		550	0.0335	0.0332	0.0329	0.033	0.0345	0.0313		550	0.0333	0.0328	0.033	0.033	0.0336	0.0336
	555	0.0362	0.0351	0.0369	0.0383	0.0373	0.0371		555	0.0344	0.0357	0.034	0.0347	0.0369	0.0322		555	0.0352	0.0345	0.0347	0.0344	0.0349	0.0352
	560	0.0355	0.0359	0.0366	0.0375	0.037	0.0359		560	0.0346	0.0334	0.034	0.0338	0.0342	0.0326		560	0.0337	0.0337	0.0339	0.0333	0.0335	0.0347
	565	0.0359	0.0364	0.0381	0.0396	0.0393	0.0379		565	0.0349	0.0351	0.0344	0.0353	0.0366	0.0341		565	0.0348	0.0357	0.0356	0.0361	0.0362	0.0353
	570	0.0345	0.0353	0.0366	0.038	0.0373	0.0367		570	0.0348	0.0343	0.0348	0.0354	0.0355	0.0334		570	0.0344	0.0356	0.0343	0.0342	0.0337	0.035
	575	0.0349	0.0344	0.0372	0.0378	0.0379	0.0358		575	0.0345	0.0338	0.0333	0.0351	0.0347	0.0324		575	0.033	0.0336	0.0342	0.0343	0.0338	0.0338
	580	0.0342	0.0348	0.0357	0.0364	0.0368	0.0356		580	0.0324	0.0329	0.0329	0.0339	0.0335	0.0317		580	0.0321	0.0318	0.0328	0.0333	0.0335	0.0327
	585	0.0361	0.0352	0.0367	0.0377	0.037	0.0371		585	0.0335	0.0342	0.0336	0.0332	0.0347	0.0322		585	0.0332	0.0341	0.0334	0.0336	0.0339	0.0333
	590	0.036	0.0354	0.0378	0.0375	0.0368	0.0366		590	0.0349	0.0341	0.0337	0.034	0.0351	0.0328		590	0.0336	0.0339	0.0335	0.034	0.0354	0.0345
	595	0.0351	0.0356	0.0371	0.0388	0.0378	0.0371		595	0.0355	0.0347	0.0351	0.0342	0.0365	0.0331		595	0.034	0.0334	0.0341	0.0349	0.035	0.0352
	600	0.0349	0.0345	0.0353	0.0355	0.0353	0.0352		600	0.0327	0.0331	0.0316	0.0322	0.0343	0.0306		600	0.0315	0.0325	0.0314	0.0323	0.0334	0.0332
	605	0.0341	0.0341	0.0349	0.0353	0.0359	0.0343		605	0.0326	0.0324	0.0322	0.0317	0.0347	0.0305		605	0.0317	0.0319	0.0311	0.032	0.0343	0.0329
	610	0.0349	0.0349	0.036	0.0372	0.0372	0.0363		610	0.034	0.0343	0.0338	0.0335	0.0357	0.0317		610	0.0328	0.034	0.0331	0.0335	0.035	0.0348
	615	0.0346	0.0343	0.0357	0.0372	0.0362	0.0358		615	0.0339	0.0344	0.0329	0.034	0.035	0.0304		615	0.0315	0.0339	0.0331	0.0326	0.0327	0.0339
	620	0.0333	0.0337	0.0347	0.0349	0.0353	0.0353		620	0.0325	0.0328	0.0321	0.0319	0.034	0.0307		620	0.0318	0.0309	0.032	0.0319	0.0316	0.0327
	625	0.0344	0.0344	0.0358	0.0366	0.0359	0.0361		625	0.0339	0.0343	0.0322	0.034	0.0355	0.032		625	0.0337	0.0338	0.0329	0.0333	0.0329	0.0347
	630	0.0323	0.0335	0.0341	0.0353	0.035	0.0343		630	0.0329	0.0331	0.0323	0.0332	0.035	0.0305		630	0.0313	0.0327	0.0319	0.0315	0.0331	0.034
	635	0.0323	0.0324	0.0345	0.0353	0.0341	0.0329		635	0.0313	0.0315	0.0313	0.032	0.0337	0.0305		635	0.0309	0.0313	0.0315	0.0308	0.0317	0.033
	640	0.0326	0.0328	0.0335	0.034	0.0336	0.0342		640	0.0309	0.0328	0.0324	0.032	0.0342	0.0301		640	0.0313	0.0315	0.0317	0.0313	0.0333	0.0326
	645	0.0323	0.0328	0.0332	0.0352	0.0336	0.0344		645	0.0312	0.032	0.0322	0.0317	0.0342	0.0306		645	0.0311	0.0326	0.0317	0.0314	0.0336	0.0333
	650	0.0324	0.032	0.033	0.0333	0.0329	0.0324		650	0.0308	0.0324	0.0306	0.0324	0.034	0.0298		650	0.0309	0.0327	0.0322	0.0323	0.0325	0.0332
	655	0.0331	0.0316	0.0333	0.034	0.0341	0.0334		655	0.0311	0.0318	0.0319	0.0326	0.0343	0.0302		655	0.0318	0.0327	0.0307	0.0317	0.0325	0.0328
	660	0.0326	0.0329	0.0338	0.0355	0.0346	0.0342		660	0.0321	0.032	0.0323	0.0322	0.0346	0.0306		660	0.0306	0.0319	0.032	0.0331	0.0331	0.0345
	665	0.0337	0.0328	0.0341	0.0343	0.0338	0.0345		665	0.0316	0.0321	0.0321	0.032	0.0345	0.0317		665	0.0308	0.0335	0.032	0.0322	0.0322	0.0334
	670	0.0331	0.0329	0.034	0.035	0.0337	0.0344		670	0.0312	0.0343	0.0322	0.0329	0.0349	0.0326		670	0.0318	0.0342	0.0329	0.0332	0.0339	0.0333
	675	0.0321	0.0321	0.0341	0.0347	0.0331	0.0343		675	0.0315	0.0338	0.0326	0.0323	0.0345	0.0311		675	0.0315	0.033	0.0319	0.033	0.0333	0.033
	680	0.0329	0.0324	0.0335	0.0343	0.0345	0.0341		680	0.0322	0.0322	0.0333	0.0339	0.0341	0.0317		680	0.0309	0.0332	0.032	0.0331	0.0332	0.0339
	685	0.0321	0.0322	0.0336	0.0334	0.0338	0.0339		685	0.0311	0.0312	0.0308	0.033	0.0335	0.0322		685	0.0307	0.0317	0.0331	0.033	0.0316	0.0327
	690	0.0331	0.0327	0.0346	0.0354	0.0354	0.0351		690	0.031	0.0325	0.0323	0.0319	0.0332	0.0329		690	0.0311	0.033	0.0328	0.0343	0.0332	0.0344
	695	0.0321	0.0336	0.0327	0.0342	0.0342	0.0342		695	0.031	0.0322	0.0309	0.0317	0.033	0.0319		695	0.0293	0.0319	0.032	0.0339	0.032	0.0325
	700	0.0327	0.033	0.0333	0.0351	0.0346	0.0345		700	0.032	0.0315	0.0319	0.0334	0.0335	0.0311		700	0.03	0.0332	0.0323	0.0327	0.0337	0.0328
	705	0.0328	0.0338	0.0342	0.0353	0.0346	0.0343		705	0.0314	0.0327	0.0323	0.0324	0.0341	0.0322		705	0.0306	0.0328	0.0332	0.0322	0.0323	0.0331
	710	0.0332	0.0336	0.0344	0.0354	0.0345	0.0347		710	0.0308	0.0336	0.033	0.0325	0.0343	0.0326		710	0.0307	0.0329	0.0351	0.0331	0.0321	0.0334
	715	0.0355	0.0342	0.0364	0.0372	0.0366	0.0351		715	0.0338	0.0334	0.033	0.0331	0.0354	0.0332		715	0.03	0.0323	0.0346	0.0331	0.0334	0.0347
	720	0.0356	0.0343	0.0377	0.0371	0.0365	0.0369		720	0.0334	0.0338	0.0331	0.0349	0.0366	0.0343		720	0.031	0.034	0.0356	0.0359	0.0337	0.0353
	725	0.0349	0.0347	0.0374	0.0373	0.0368	0.0368		725	0.0339	0.0339	0.0341	0.0349	0.036	0.0344		725	0.0312	0.0327	0.0345	0.0346	0.0332	0.0348
	730	0.0374	0.038	0.0396	0.0403	0.0406	0.0392		730	0.0365	0.0367	0.037	0.0371	0.0387	0.0363		730	0.0339	0.0362	0.0375	0.0378	0.0369	0.0384
	735	0.0382	0.0397	0.0411	0.0421	0.0413	0.0413		735	0.0364	0.0372	0.0382	0.0387	0.0401	0.0383		735	0.0332	0.0383	0.0388	0.0403	0.0393	0.0407
	740	0.0394	0.0405	0.0421	0.0419	0.0423	0.0413		740	0.038	0.0389	0.0395	0.039	0.0403	0.0394		740	0.0347	0.0388	0.0401	0.0408	0.0389	0.0408
	745	0.0408	0.0409	0.0432	0.0436	0.0423	0.0425		745	0.0393	0.0414	0.0403	0.04	0.0419	0.0405		745	0.0351	0.0402	0.0403	0.0414	0.0399	0.0419
	750	0.0403	0.0413	0.043	0.0433	0.0425	0.0423		750	0.0399	0.04	0.0399	0.0393	0.0417	0.0416		750	0.0357	0.0383	0.0403	0.0418	0.0412	0.0411
	755	0.0387	0.0403	0.0415	0.0427	0.0419	0.0425		755	0.0375	0.039	0.0396	0.0399	0.0408	0.0405		755	0.0338	0.0378	0.0393	0.0412	0.0399	0.0419
	760	0.0412	0.0412	0.0434	0.0439	0.0438	0.0422		760	0.0391	0.0395	0.041	0.0404	0.0423	0.0406		760	0.0346	0.0382	0.0408	0.042	0.0403	0.0432
	765	0.0387	0.0399	0.0422	0.0422	0.0407	0.0409		765	0.038	0.038	0.0376	0.0382	0.0403	0.0387		765	0.0328	0.0369	0.0389	0.0391	0.0392	0.0407
	770	0.0394	0.0409	0.042	0.043	0.0421	0.0418		770	0.0375	0.0384	0.0398	0.0393	0.0411	0.0388		770	0.0331	0.0368	0.04	0.0395	0.0396	0.0397
	775	0.0389	0.0414	0.0428	0.042	0.0429	0.0411		775	0.0373	0.0375	0.0385	0.0386	0.0405	0.0388		775	0.0323	0.0379	0.0397	0.0403	0.0399	0.04
	780	0.0388	0.0408	0.0417	0.0421	0.041	0.0424		780	0.0371	0.0379	0.0378	0.0385	0.0396	0.0395		780	0.0326	0.0377	0.0391	0.0402	0.0387	0.0392
	785	0.0379	0.0399	0.0408	0.0421	0.0403	0.042		785	0.0367	0.0383	0.0382	0.0377	0.0398	0.0372		785	0.0313	0.0365	0.0383	0.0394	0.0403	0.0414
	790	0.0371	0.0378	0.0415	0.0406	0.0403	0.04		790	0.0357	0.036	0.0364	0.036	0.0375	0.037		790	0.0313	0.0341	0.0373	0.0395	0.038	0.0405
	795	0.0367	0.0388	0.0409	0.0408	0.0398	0.0394		795	0.035	0.0354	0.0375	0.037	0.0379	0.0367		795	0.0295	0.0348	0.0365	0.0398	0.0374	0.0379
	800	0.0373	0.0389	0.0403	0.0397	0.0387	0.0387		800	0.0338	0.035	0.0358	0.036	0.0369	0.0367		800	0.0294	0.0343	0.0373	0.0396	0.038	0.0385

## Sheet: Table 4
	Intra-Assay Determination with n = 60 Aluminum Replicates, Run 1
	Blank = 295 μL Water + 5 μL DMSO		Calibration Curve					n = 60 Aluminum Replicates
	[Al3+] (μM)	Blank	0	1	2	4	8	4	4	4	4	4	4	4	4	4	4	4	4	4	4	4	4	4	4	4	4	4	4	4	4	4	4	4	4	4	4	4	4	4	4	4	4	4	4	4	4	4	4
	Wavelength (nm)	Absorbance
	300	0.4338	1.6145	1.6513	1.6153	1.6	1.6345	1.6055	1.6042	1.6583	1.6009	1.6307	1.6313	1.6256	1.5954	1.6471	1.6021	1.6164	1.5796	1.6783	1.6046	1.6327	1.6246	1.6181	1.608	1.6142	1.6103	1.5893	1.6082	1.6065	1.6158	1.554	1.5655	1.5973	1.6332	1.5918	1.6095	1.6147	1.5837	1.5817	1.5844	1.6105	1.5987	1.5376	1.5465	1.5518	1.5841	1.5658	1.5817
	305	0.3131	1.5367	1.5785	1.5382	1.5273	1.5536	1.5259	1.5244	1.5672	1.5094	1.5408	1.5491	1.536	1.5146	1.5597	1.5228	1.5398	1.5032	1.5994	1.5244	1.5479	1.5402	1.5319	1.5263	1.5353	1.5331	1.5083	1.5313	1.5313	1.5418	1.4759	1.4804	1.5183	1.5541	1.5106	1.5304	1.5365	1.5065	1.505	1.5117	1.5356	1.5256	1.4578	1.4684	1.4737	1.5067	1.4869	1.5064
	310	0.2576	1.5386	1.5817	1.54	1.5265	1.5439	1.5207	1.5206	1.5564	1.4985	1.5287	1.5431	1.5271	1.5105	1.5513	1.5226	1.5342	1.5021	1.5971	1.5173	1.5407	1.53	1.5248	1.5192	1.5325	1.5303	1.5026	1.5281	1.5289	1.5417	1.4718	1.4719	1.5148	1.549	1.506	1.5267	1.5317	1.5038	1.5024	1.5108	1.5312	1.5236	1.4503	1.4653	1.4675	1.5019	1.4791	1.5011
	315	0.2323	1.5687	1.6166	1.5707	1.5564	1.5688	1.5481	1.5474	1.5805	1.5238	1.552	1.5722	1.5527	1.5387	1.5767	1.5499	1.5646	1.5295	1.6266	1.5437	1.5675	1.5578	1.5497	1.5481	1.5602	1.5586	1.5296	1.5572	1.5573	1.5712	1.4967	1.496	1.5434	1.5789	1.5307	1.5547	1.5588	1.5333	1.5307	1.5391	1.5621	1.5539	1.4745	1.4895	1.4916	1.5296	1.5059	1.5295
	320	0.2185	1.6413	1.6938	1.6431	1.6262	1.6338	1.6169	1.616	1.6475	1.59	1.6188	1.643	1.6188	1.6065	1.6451	1.6194	1.6338	1.6007	1.7022	1.6103	1.637	1.6251	1.6176	1.6146	1.6292	1.6301	1.5973	1.6283	1.6266	1.6439	1.5639	1.5603	1.6122	1.6475	1.6	1.6234	1.6275	1.6013	1.6021	1.6072	1.6363	1.6243	1.5393	1.5571	1.5582	1.5974	1.572	1.5959
	325	0.2041	1.7488	1.8087	1.7521	1.7375	1.7434	1.7235	1.7229	1.7517	1.6933	1.7224	1.7525	1.7233	1.7109	1.7508	1.7272	1.7423	1.7074	1.8149	1.7166	1.7447	1.7322	1.7217	1.7201	1.7385	1.7375	1.7047	1.7363	1.7368	1.7545	1.6682	1.662	1.7191	1.7576	1.7055	1.7318	1.7356	1.7058	1.7085	1.7172	1.744	1.7342	1.6388	1.6616	1.6604	1.7039	1.6758	1.7036
	330	0.1943	1.8609	1.9291	1.8684	1.8528	1.8596	1.8359	1.8356	1.8667	1.8027	1.8331	1.8664	1.8336	1.8238	1.8637	1.8406	1.859	1.8215	1.935	1.8284	1.8584	1.8428	1.8354	1.8337	1.8508	1.8497	1.8124	1.8515	1.8522	1.8703	1.7792	1.7697	1.8323	1.8751	1.8186	1.8449	1.8515	1.8209	1.8189	1.8279	1.8588	1.8494	1.7458	1.7692	1.7688	1.8171	1.7861	1.8168
	335	0.1811	2.0039	2.0812	2.0165	1.9986	2.0072	1.9795	1.9816	2.0122	1.9431	1.9745	2.0148	1.976	1.9663	2.0092	1.9869	2.0056	1.966	2.0901	1.9709	2.0037	1.986	1.9764	1.9778	1.9975	1.9965	1.958	1.9983	2.0002	2.0215	1.9188	1.9089	1.9776	2.0251	1.9619	1.9905	1.9948	1.9641	1.9649	1.9735	2.0072	1.9962	1.8831	1.9097	1.909	1.9618	1.9258	1.9594
	340	0.1688	2.123	2.2063	2.1389	2.1158	2.1311	2.0979	2.0976	2.1311	2.0583	2.0908	2.1346	2.0914	2.0823	2.1299	2.1044	2.1288	2.0836	2.2154	2.0861	2.1241	2.105	2.0948	2.0944	2.1165	2.1166	2.0718	2.1183	2.1219	2.1445	2.0346	2.0229	2.0953	2.1449	2.0783	2.1101	2.1134	2.0799	2.0809	2.094	2.1269	2.1176	1.9946	2.0243	2.0223	2.0799	2.0409	2.0782
	345	0.1577	2.2373	2.3246	2.2543	2.2307	2.2511	2.2122	2.2136	2.2473	2.1681	2.203	2.246	2.2074	2.1946	2.2441	2.2171	2.2433	2.1963	2.3359	2.1994	2.2388	2.2177	2.205	2.2082	2.2336	2.2301	2.1812	2.2341	2.2361	2.2611	2.1451	2.132	2.2078	2.2624	2.1905	2.2261	2.2304	2.1954	2.1926	2.2079	2.2455	2.2353	2.1054	2.1324	2.132	2.1938	2.1534	2.1934
	350	0.153	2.3128	2.4015	2.3309	2.3081	2.327	2.2861	2.2808	2.3235	2.2388	2.2788	2.3215	2.2819	2.2672	2.3196	2.2914	2.3208	2.2701	2.412	2.2791	2.3114	2.295	2.2779	2.2795	2.3069	2.3042	2.2578	2.3093	2.3125	2.337	2.2162	2.2032	2.2829	2.3393	2.2644	2.3014	2.3043	2.2664	2.2663	2.2818	2.3195	2.3113	2.1768	2.2028	2.2068	2.2676	2.2268	2.2654
	355	0.1402	2.3158	2.4074	2.3438	2.3118	2.3358	2.2968	2.2969	2.3327	2.244	2.2903	2.3038	2.2957	2.2705	2.333	2.2794	2.3289	2.2768	2.4211	2.2957	2.3137	2.3086	2.2884	2.2898	2.3103	2.3167	2.2561	2.3155	2.321	2.352	2.2304	2.2243	2.2902	2.3501	2.2695	2.3083	2.3114	2.2771	2.2739	2.2964	2.3245	2.321	2.1907	2.2098	2.2293	2.2785	2.2409	2.278
	360	0.1248	2.2579	2.3497	2.2749	2.2565	2.2811	2.2408	2.2352	2.2725	2.1901	2.2329	2.2607	2.2279	2.213	2.267	2.2358	2.265	2.2173	2.3555	2.2294	2.257	2.2412	2.225	2.2286	2.2478	2.2558	2.2007	2.2576	2.2576	2.283	2.169	2.1543	2.2335	2.2841	2.2165	2.2452	2.2553	2.2147	2.22	2.2321	2.2562	2.2582	2.1332	2.1567	2.1647	2.223	2.1853	2.2153
	365	0.1009	2.1298	2.2082	2.1462	2.1245	2.1555	2.1057	2.1059	2.1458	2.065	2.1009	2.135	2.0985	2.0884	2.1383	2.1084	2.1391	2.0888	2.2235	2.1005	2.1233	2.1155	2.0924	2.0995	2.1199	2.1184	2.0697	2.1252	2.1277	2.1589	2.0447	2.0281	2.1024	2.157	2.0815	2.1189	2.1251	2.0845	2.0905	2.1013	2.137	2.1292	2.0022	2.0319	2.0401	2.0928	2.0576	2.0882
	370	0.0754	1.9176	1.9819	1.9254	1.9056	1.9519	1.8976	1.8933	1.9308	1.8571	1.8889	1.9193	1.8875	1.8785	1.9265	1.8908	1.9278	1.8734	1.9947	1.8898	1.9034	1.9	1.8758	1.8812	1.9036	1.8983	1.8598	1.9081	1.9159	1.9409	1.8372	1.8228	1.8917	1.9388	1.8704	1.903	1.9173	1.8706	1.8746	1.8893	1.9252	1.9144	1.8109	1.8257	1.8334	1.8819	1.8562	1.8747
	375	0.0538	1.6311	1.6832	1.6382	1.6263	1.6779	1.6228	1.6173	1.6573	1.5839	1.6122	1.6345	1.6127	1.6085	1.6469	1.6157	1.6468	1.5984	1.7034	1.6171	1.6312	1.6254	1.6012	1.606	1.6305	1.6227	1.5874	1.6329	1.639	1.6573	1.5715	1.5578	1.6192	1.6575	1.5954	1.6264	1.6374	1.5989	1.6073	1.6166	1.6434	1.6403	1.5471	1.5632	1.5718	1.6111	1.5868	1.6029
	380	0.043	1.3311	1.3803	1.3455	1.3433	1.4001	1.339	1.3359	1.3709	1.3053	1.3337	1.3495	1.3335	1.3252	1.3628	1.3369	1.3624	1.3219	1.4042	1.3368	1.3451	1.3412	1.3251	1.3266	1.3463	1.3419	1.3104	1.3459	1.3549	1.37	1.2945	1.2881	1.3375	1.3711	1.321	1.344	1.3572	1.3207	1.3241	1.335	1.3567	1.3545	1.2754	1.291	1.2978	1.3295	1.3102	1.3233
	385	0.041	1.0625	1.1031	1.0722	1.0796	1.1432	1.0744	1.0752	1.1097	1.0529	1.0767	1.0839	1.0778	1.067	1.1016	1.0756	1.0976	1.0639	1.1273	1.0842	1.0825	1.0822	1.0655	1.0687	1.0836	1.0778	1.0533	1.0839	1.0851	1.1001	1.0421	1.0428	1.0769	1.1087	1.0606	1.084	1.0996	1.064	1.0694	1.075	1.092	1.0895	1.0284	1.0417	1.0482	1.0714	1.062	1.0648
	390	0.0404	0.8031	0.833	0.8185	0.8316	0.9021	0.831	0.8299	0.8567	0.8106	0.8316	0.8363	0.8324	0.8278	0.8519	0.8322	0.8497	0.8225	0.8686	0.8407	0.8345	0.8331	0.8265	0.825	0.8424	0.8313	0.8141	0.834	0.8384	0.8506	0.8053	0.8061	0.8317	0.8612	0.8211	0.8407	0.8538	0.8208	0.8257	0.8314	0.8411	0.8408	0.7978	0.8048	0.8114	0.828	0.8227	0.8202
	395	0.0405	0.574	0.6019	0.5923	0.6156	0.6859	0.6157	0.6117	0.6334	0.5993	0.6173	0.6165	0.6156	0.6117	0.6318	0.6177	0.6293	0.6078	0.6411	0.6282	0.6197	0.6196	0.6121	0.6103	0.6234	0.6172	0.6025	0.617	0.6203	0.6274	0.5964	0.5995	0.6177	0.6374	0.6098	0.625	0.636	0.607	0.6127	0.6153	0.6233	0.6211	0.5913	0.5945	0.6019	0.6106	0.6088	0.6069
	400	0.0396	0.4002	0.418	0.4167	0.4472	0.5162	0.447	0.4453	0.4637	0.4344	0.4485	0.4486	0.4498	0.4472	0.4621	0.4498	0.4568	0.4418	0.463	0.458	0.449	0.4499	0.4452	0.4438	0.4577	0.4475	0.4376	0.4479	0.4508	0.4557	0.434	0.4358	0.4504	0.4648	0.4448	0.4538	0.4654	0.4424	0.4462	0.4479	0.4543	0.4517	0.4327	0.4321	0.4409	0.4436	0.4449	0.4398
	405	0.0382	0.2634	0.2791	0.2828	0.3143	0.3807	0.3136	0.3128	0.3285	0.3074	0.3158	0.3143	0.3173	0.3161	0.3274	0.3187	0.3229	0.3097	0.325	0.324	0.3186	0.3183	0.3138	0.3141	0.3254	0.3147	0.3093	0.3131	0.3169	0.3219	0.3059	0.3109	0.3196	0.3271	0.3155	0.322	0.3322	0.3126	0.3165	0.3172	0.3198	0.3162	0.3075	0.3066	0.3127	0.3144	0.3163	0.3091
	410	0.0394	0.1856	0.197	0.2052	0.2357	0.2951	0.2343	0.2347	0.2478	0.2302	0.2381	0.2354	0.238	0.2379	0.2461	0.2399	0.2425	0.2337	0.2419	0.2436	0.2387	0.2401	0.2365	0.2359	0.2482	0.2363	0.2329	0.2371	0.237	0.2403	0.2316	0.2328	0.2423	0.2465	0.2366	0.2425	0.2509	0.2347	0.237	0.2384	0.243	0.2396	0.2299	0.2305	0.235	0.2372	0.2354	0.2323
	415	0.0389	0.1279	0.1356	0.1427	0.1736	0.2287	0.1727	0.1733	0.1847	0.1704	0.1752	0.1738	0.177	0.1753	0.1837	0.1794	0.1814	0.1712	0.1747	0.1841	0.1759	0.1792	0.1771	0.1754	0.1849	0.1724	0.1733	0.1745	0.1743	0.1765	0.1713	0.1724	0.1816	0.1813	0.1756	0.1808	0.1891	0.1737	0.1752	0.1761	0.1792	0.1755	0.1717	0.1703	0.1741	0.1757	0.1751	0.171
	420	0.0352	0.0881	0.0943	0.1015	0.1299	0.1741	0.1276	0.1285	0.1379	0.1259	0.1307	0.1283	0.1312	0.1294	0.1365	0.1348	0.1322	0.1267	0.1304	0.1388	0.1319	0.1333	0.1315	0.1299	0.1416	0.1278	0.1283	0.1298	0.1305	0.1308	0.1282	0.1282	0.1363	0.1346	0.1304	0.1343	0.1421	0.1304	0.1305	0.131	0.1334	0.1298	0.1278	0.1289	0.1296	0.1295	0.13	0.1265
	425	0.0358	0.0701	0.0761	0.0817	0.1088	0.1451	0.1057	0.1053	0.1125	0.1047	0.1068	0.1056	0.1075	0.1067	0.1117	0.1133	0.1081	0.1055	0.107	0.115	0.1087	0.1093	0.1081	0.1079	0.1191	0.1066	0.1056	0.107	0.1072	0.1083	0.105	0.1048	0.1129	0.1099	0.1067	0.1092	0.1158	0.1077	0.107	0.1088	0.1091	0.108	0.1056	0.1059	0.106	0.106	0.1045	0.1043
	430	0.0364	0.0614	0.0652	0.0706	0.0912	0.1219	0.0891	0.0888	0.0973	0.0873	0.0919	0.0881	0.0923	0.09	0.0947	0.0947	0.0918	0.0878	0.0878	0.1004	0.0912	0.094	0.0915	0.0913	0.1013	0.0893	0.0905	0.0887	0.0902	0.09	0.0887	0.0882	0.0946	0.0939	0.0894	0.0926	0.0999	0.0905	0.0893	0.0918	0.0937	0.0905	0.0906	0.0867	0.0898	0.0878	0.0896	0.0867
	435	0.035	0.0524	0.0536	0.0575	0.0749	0.0975	0.0716	0.0729	0.0805	0.0714	0.0753	0.0713	0.0762	0.0721	0.0796	0.0778	0.0763	0.0695	0.0704	0.0847	0.0739	0.0773	0.0739	0.0736	0.0848	0.0707	0.0732	0.0718	0.0724	0.0748	0.0729	0.0726	0.0778	0.0752	0.0734	0.0758	0.083	0.0752	0.073	0.0754	0.0763	0.0742	0.0746	0.0703	0.0744	0.0713	0.073	0.0687
	440	0.0355	0.0489	0.0482	0.0517	0.0656	0.0804	0.0631	0.0627	0.069	0.0619	0.0653	0.0615	0.065	0.0639	0.0689	0.0689	0.0646	0.0614	0.0601	0.0729	0.0655	0.0659	0.0629	0.0637	0.0742	0.0627	0.0628	0.0637	0.0643	0.0642	0.0622	0.0615	0.07	0.066	0.0635	0.065	0.072	0.0635	0.0637	0.0648	0.0657	0.0642	0.0648	0.0623	0.0634	0.0618	0.0617	0.0608
	445	0.0345	0.0457	0.0455	0.047	0.0584	0.0683	0.0556	0.0556	0.0606	0.0553	0.0569	0.0548	0.0572	0.0549	0.0584	0.062	0.0561	0.0542	0.0537	0.0652	0.0578	0.0574	0.0568	0.0576	0.0678	0.0544	0.0553	0.0553	0.0555	0.0571	0.0546	0.0548	0.0618	0.0573	0.0558	0.0572	0.0637	0.0558	0.0564	0.0574	0.0577	0.0567	0.0562	0.0551	0.0556	0.0545	0.0547	0.0529
	450	0.0347	0.0445	0.0441	0.0438	0.0547	0.0588	0.0499	0.0511	0.054	0.051	0.0508	0.0501	0.0519	0.0495	0.0537	0.0578	0.0508	0.0492	0.0483	0.0574	0.0533	0.0512	0.0512	0.0512	0.0619	0.0491	0.0504	0.0502	0.0496	0.0493	0.0483	0.0483	0.0546	0.0519	0.0505	0.0515	0.0566	0.0505	0.0499	0.0507	0.0516	0.0511	0.0497	0.0501	0.0499	0.0489	0.0486	0.0483
	455	0.0356	0.0436	0.0417	0.041	0.0501	0.0526	0.046	0.0464	0.0504	0.0469	0.0464	0.0464	0.0484	0.046	0.0499	0.053	0.0465	0.0446	0.0433	0.0551	0.0493	0.0487	0.0463	0.0462	0.0575	0.0461	0.0452	0.0459	0.0445	0.0457	0.0442	0.0438	0.0509	0.0466	0.0453	0.0465	0.0521	0.0461	0.0455	0.0459	0.0481	0.0456	0.0461	0.0456	0.0464	0.0451	0.0434	0.0449
	460	0.0338	0.041	0.0377	0.0374	0.0444	0.0446	0.0405	0.0416	0.0444	0.0409	0.0417	0.0409	0.042	0.0406	0.0457	0.0471	0.0418	0.0383	0.0393	0.0493	0.0426	0.042	0.0411	0.0411	0.0518	0.0405	0.0401	0.0401	0.0409	0.0401	0.0385	0.0394	0.045	0.0416	0.0397	0.0406	0.0478	0.0405	0.0401	0.0411	0.0414	0.041	0.0405	0.0408	0.0403	0.0393	0.0392	0.0393
	465	0.0311	0.0408	0.0365	0.0356	0.0419	0.04	0.0386	0.0393	0.0442	0.0383	0.0402	0.0379	0.0404	0.0374	0.043	0.0445	0.0393	0.0362	0.0354	0.0486	0.0416	0.0401	0.0392	0.0391	0.0489	0.0363	0.0365	0.0373	0.0362	0.0373	0.0369	0.0374	0.0426	0.0394	0.0374	0.0391	0.0464	0.0381	0.037	0.0383	0.0399	0.038	0.0395	0.0388	0.0376	0.0371	0.0372	0.0366
	470	0.0303	0.038	0.0354	0.0337	0.039	0.0379	0.0363	0.0353	0.0408	0.034	0.0382	0.0319	0.0376	0.0331	0.0408	0.0403	0.0368	0.0319	0.0296	0.0476	0.0369	0.0375	0.0335	0.0341	0.0447	0.0311	0.0329	0.0328	0.0327	0.0342	0.0333	0.0331	0.0399	0.036	0.0344	0.0346	0.0436	0.0346	0.0332	0.0352	0.0366	0.0329	0.0363	0.034	0.0352	0.0324	0.0333	0.0315
	475	0.032	0.0386	0.0352	0.0335	0.0388	0.0364	0.0356	0.0351	0.0415	0.0346	0.0366	0.0331	0.0362	0.034	0.0412	0.0423	0.037	0.0326	0.0312	0.0475	0.0361	0.038	0.0338	0.0333	0.045	0.0325	0.0338	0.0326	0.032	0.0331	0.0327	0.033	0.0389	0.0349	0.0336	0.0337	0.043	0.0337	0.0321	0.0344	0.0366	0.0337	0.0339	0.0348	0.0344	0.033	0.0338	0.0328
	480	0.0323	0.0402	0.0358	0.0335	0.0388	0.0351	0.0352	0.0357	0.0402	0.036	0.0365	0.0326	0.038	0.0343	0.0407	0.0408	0.0353	0.0326	0.0326	0.0459	0.0362	0.0367	0.034	0.0332	0.0448	0.0324	0.0335	0.0333	0.0335	0.0334	0.033	0.0336	0.0391	0.0358	0.035	0.0351	0.0442	0.0343	0.0333	0.0354	0.0363	0.0335	0.0367	0.0337	0.0343	0.032	0.0325	0.0331
	485	0.0324	0.0394	0.0358	0.0347	0.0398	0.0351	0.0354	0.038	0.0393	0.0366	0.0354	0.0355	0.0368	0.0354	0.0373	0.0429	0.0363	0.0354	0.0346	0.043	0.0381	0.0376	0.0372	0.0353	0.0459	0.0352	0.0341	0.0345	0.0351	0.0351	0.0327	0.0342	0.0402	0.0359	0.0347	0.036	0.0412	0.0353	0.0343	0.0354	0.0363	0.0361	0.0351	0.0361	0.0346	0.0341	0.0337	0.0345
	490	0.032	0.0397	0.0361	0.0341	0.0386	0.034	0.0359	0.0364	0.0396	0.0358	0.0353	0.0346	0.0358	0.0334	0.0379	0.0417	0.0355	0.0338	0.0345	0.0436	0.037	0.0359	0.0356	0.0353	0.0453	0.0337	0.0325	0.034	0.0337	0.0335	0.0336	0.0317	0.0386	0.0349	0.0334	0.0337	0.0407	0.0342	0.0334	0.0348	0.0355	0.0336	0.0342	0.0362	0.0333	0.0331	0.0315	0.0345
	495	0.033	0.0405	0.0371	0.0337	0.04	0.0344	0.0358	0.0354	0.0388	0.0357	0.0363	0.0343	0.0372	0.034	0.038	0.0425	0.0361	0.0338	0.0327	0.044	0.0366	0.0361	0.0348	0.0334	0.0453	0.0328	0.0324	0.0341	0.032	0.0322	0.031	0.0311	0.0384	0.0341	0.0325	0.033	0.0399	0.0343	0.0327	0.0339	0.0354	0.0329	0.0348	0.0339	0.0345	0.0317	0.0318	0.0325
	500	0.0328	0.041	0.0362	0.0343	0.0393	0.0362	0.0362	0.0366	0.0402	0.0356	0.036	0.0339	0.0368	0.0343	0.039	0.0425	0.0367	0.0346	0.0332	0.0454	0.0374	0.0357	0.035	0.0337	0.0452	0.0343	0.0331	0.0337	0.0321	0.0344	0.0324	0.0317	0.0387	0.0331	0.033	0.0336	0.0393	0.0334	0.0327	0.0336	0.0356	0.0341	0.0339	0.034	0.0337	0.0329	0.0323	0.0333
	505	0.0334	0.04	0.0372	0.0349	0.0388	0.034	0.037	0.0352	0.0395	0.0348	0.0374	0.0337	0.0358	0.0339	0.0379	0.0415	0.0363	0.0343	0.0325	0.0448	0.0372	0.0355	0.0339	0.0332	0.0453	0.0319	0.0332	0.0341	0.0326	0.0342	0.0318	0.0312	0.0386	0.0331	0.0333	0.0325	0.0396	0.0336	0.0333	0.0335	0.0361	0.0353	0.0348	0.0344	0.0335	0.0326	0.0325	0.0334
	510	0.031	0.039	0.035	0.0328	0.0381	0.0334	0.034	0.0342	0.0376	0.0336	0.0339	0.0317	0.0354	0.0327	0.0377	0.0404	0.0347	0.0335	0.0313	0.044	0.0356	0.035	0.0339	0.0331	0.0441	0.0335	0.0313	0.0328	0.0315	0.0337	0.0315	0.0306	0.0376	0.0323	0.0328	0.0325	0.0396	0.0327	0.0323	0.0339	0.0354	0.0333	0.0326	0.0341	0.031	0.0314	0.0309	0.0316
	515	0.032	0.0405	0.0371	0.0343	0.04	0.0344	0.0374	0.0364	0.0392	0.0355	0.0353	0.033	0.0355	0.0343	0.0378	0.0424	0.0358	0.0345	0.0327	0.0447	0.0372	0.0358	0.0365	0.0353	0.0453	0.0344	0.0335	0.0338	0.0336	0.035	0.033	0.031	0.038	0.033	0.0344	0.0339	0.0402	0.0339	0.0337	0.0338	0.037	0.0345	0.0349	0.035	0.0332	0.0328	0.0322	0.0339
	520	0.0341	0.0405	0.0368	0.037	0.041	0.0354	0.037	0.0363	0.0387	0.0365	0.035	0.0346	0.0363	0.0355	0.0373	0.044	0.0368	0.0356	0.0348	0.0435	0.0366	0.0356	0.0354	0.0356	0.0463	0.0353	0.0357	0.0348	0.0348	0.0356	0.0328	0.0316	0.0395	0.033	0.0348	0.0352	0.0416	0.0345	0.0335	0.0337	0.0363	0.0346	0.0355	0.0353	0.0337	0.0337	0.0317	0.0344
	525	0.0327	0.0409	0.0352	0.0346	0.0377	0.0339	0.0359	0.0356	0.0385	0.0345	0.0357	0.0348	0.0364	0.034	0.0367	0.0425	0.0352	0.0344	0.0333	0.0436	0.0372	0.0356	0.0352	0.0348	0.0449	0.0335	0.0336	0.0334	0.0335	0.034	0.0322	0.0325	0.0399	0.0322	0.0323	0.0342	0.0402	0.0349	0.0345	0.0345	0.0355	0.0336	0.035	0.0356	0.0333	0.0328	0.0315	0.0325
	530	0.0337	0.0405	0.0369	0.0345	0.0397	0.0348	0.0369	0.0369	0.0387	0.0371	0.0345	0.0362	0.0365	0.0345	0.0364	0.0431	0.0345	0.0359	0.0356	0.0418	0.0387	0.036	0.0365	0.036	0.0466	0.0356	0.0347	0.0351	0.0343	0.0343	0.0327	0.0324	0.0416	0.0343	0.0342	0.0346	0.0413	0.0353	0.0342	0.0343	0.0374	0.0355	0.0344	0.0371	0.0337	0.0345	0.0324	0.0353
	535	0.0335	0.0404	0.0362	0.0351	0.0408	0.0345	0.0365	0.036	0.0393	0.0362	0.035	0.0349	0.0366	0.0349	0.0375	0.0438	0.036	0.0354	0.0346	0.0436	0.0379	0.0362	0.0364	0.0357	0.045	0.0338	0.0341	0.034	0.0329	0.0343	0.0328	0.032	0.0406	0.0329	0.0335	0.0348	0.0404	0.0342	0.0344	0.0341	0.0371	0.0344	0.035	0.0357	0.0333	0.0333	0.0318	0.0341
	540	0.033	0.0403	0.0362	0.0343	0.0387	0.0339	0.0365	0.036	0.0395	0.0349	0.0357	0.0347	0.0365	0.0341	0.0372	0.0426	0.035	0.0341	0.034	0.0439	0.037	0.0361	0.0356	0.0353	0.0443	0.0347	0.0341	0.0337	0.0333	0.0344	0.032	0.0321	0.0403	0.0339	0.0332	0.0342	0.0403	0.0342	0.0343	0.035	0.0362	0.0354	0.0347	0.0357	0.0329	0.033	0.0321	0.0335
	545	0.0324	0.0398	0.0354	0.0338	0.0394	0.0342	0.0356	0.0361	0.0372	0.0347	0.0344	0.034	0.0357	0.0336	0.0352	0.042	0.0347	0.034	0.0336	0.0429	0.0367	0.0351	0.0354	0.0343	0.0443	0.0334	0.0342	0.0335	0.033	0.0338	0.0319	0.0309	0.0405	0.0331	0.0337	0.0341	0.0396	0.0331	0.0335	0.0341	0.0359	0.0339	0.0342	0.0337	0.0328	0.0323	0.0315	0.0319
	550	0.0337	0.0411	0.0378	0.0349	0.0403	0.0348	0.0366	0.0353	0.0393	0.0359	0.0347	0.0347	0.0366	0.035	0.0375	0.043	0.0357	0.0356	0.0356	0.0447	0.0365	0.0358	0.0357	0.0358	0.0457	0.0349	0.0341	0.0336	0.034	0.034	0.0328	0.0317	0.0403	0.0327	0.0335	0.0347	0.0402	0.0338	0.0347	0.035	0.0369	0.0341	0.0353	0.0359	0.0339	0.0327	0.0328	0.0335
	555	0.0328	0.0407	0.0351	0.0335	0.0401	0.034	0.0364	0.0337	0.0375	0.0351	0.0336	0.0339	0.0352	0.0333	0.0354	0.0432	0.0334	0.0335	0.0331	0.0442	0.0358	0.0342	0.0353	0.0353	0.0431	0.033	0.0325	0.0337	0.0327	0.0332	0.0316	0.0312	0.0386	0.0325	0.032	0.0335	0.0394	0.0329	0.0328	0.0334	0.0357	0.0333	0.0337	0.034	0.032	0.0317	0.0316	0.0328
	560	0.0335	0.0411	0.0369	0.0358	0.0397	0.0349	0.037	0.036	0.0391	0.0363	0.0354	0.0347	0.0364	0.0347	0.0366	0.0432	0.0355	0.0354	0.035	0.0444	0.0374	0.0372	0.036	0.0366	0.0456	0.0348	0.0349	0.035	0.0334	0.0341	0.0329	0.0313	0.0411	0.0323	0.0334	0.0336	0.041	0.0324	0.0351	0.0339	0.0379	0.0358	0.0345	0.0365	0.0349	0.0331	0.0325	0.0335
	565	0.0337	0.0407	0.0364	0.0353	0.0385	0.0329	0.0374	0.0349	0.0389	0.0359	0.0359	0.0344	0.0357	0.0338	0.0369	0.0428	0.033	0.0327	0.0342	0.0443	0.0371	0.0344	0.0373	0.0351	0.0439	0.0342	0.0339	0.0357	0.0332	0.035	0.0326	0.0318	0.0413	0.0333	0.0337	0.0333	0.0401	0.0336	0.0348	0.0351	0.0353	0.0337	0.036	0.0357	0.0339	0.0333	0.0321	0.0333
	570	0.033	0.0396	0.0364	0.0342	0.0398	0.034	0.0367	0.0352	0.0389	0.0355	0.035	0.0349	0.0356	0.0338	0.0363	0.042	0.0338	0.0333	0.0336	0.0433	0.0371	0.0353	0.0356	0.0349	0.0433	0.034	0.0336	0.0343	0.0339	0.0338	0.0321	0.0318	0.0414	0.0321	0.0335	0.0334	0.0396	0.0337	0.0333	0.0344	0.035	0.0342	0.0338	0.0354	0.034	0.0335	0.0325	0.0334
	575	0.0328	0.0406	0.0349	0.0344	0.0395	0.0346	0.0365	0.0356	0.0392	0.0347	0.0346	0.0345	0.0354	0.0335	0.035	0.0432	0.034	0.0338	0.0345	0.0432	0.0374	0.0346	0.0368	0.0349	0.0454	0.0347	0.0335	0.0344	0.0333	0.0337	0.0325	0.0321	0.0414	0.0335	0.0329	0.0339	0.0406	0.0347	0.0335	0.0347	0.0361	0.0341	0.0361	0.0353	0.0339	0.0334	0.0322	0.0331
	580	0.0337	0.0386	0.0365	0.0339	0.0384	0.0328	0.0366	0.0346	0.0382	0.0357	0.0339	0.0342	0.0361	0.0337	0.0368	0.0422	0.0346	0.0331	0.0328	0.0436	0.0372	0.0349	0.0358	0.0349	0.0435	0.034	0.0349	0.0335	0.0329	0.0336	0.0325	0.0306	0.0414	0.033	0.0331	0.0338	0.0393	0.0329	0.0327	0.0337	0.0368	0.0341	0.0353	0.0345	0.0335	0.0327	0.0311	0.0323
	585	0.0333	0.0408	0.0338	0.0352	0.0374	0.0348	0.0339	0.0344	0.0395	0.0332	0.0364	0.0343	0.0355	0.0343	0.0359	0.0403	0.0348	0.0322	0.0343	0.0424	0.0356	0.0357	0.0351	0.035	0.0425	0.0339	0.0342	0.0333	0.0333	0.0336	0.0313	0.032	0.0412	0.0327	0.0326	0.033	0.0396	0.0329	0.0334	0.0336	0.0335	0.0328	0.0333	0.0347	0.0348	0.0326	0.033	0.0321
	590	0.0339	0.0422	0.0351	0.0365	0.0388	0.0359	0.0349	0.0367	0.0406	0.0341	0.0383	0.0356	0.0372	0.0354	0.0379	0.041	0.0365	0.0344	0.035	0.0422	0.0382	0.0357	0.0376	0.0362	0.0452	0.0347	0.035	0.0355	0.0354	0.0349	0.0323	0.0323	0.0415	0.0348	0.0351	0.0347	0.0412	0.0352	0.0351	0.0357	0.0332	0.0351	0.0352	0.0373	0.036	0.0346	0.0341	0.0347
	595	0.034	0.0416	0.0349	0.035	0.0373	0.0347	0.0351	0.0364	0.0398	0.0327	0.0372	0.0342	0.0363	0.0335	0.0366	0.0395	0.0344	0.033	0.034	0.0426	0.0365	0.0356	0.0364	0.0351	0.044	0.0337	0.0341	0.0335	0.0353	0.0337	0.0314	0.0321	0.0417	0.0345	0.0333	0.0346	0.041	0.0344	0.0333	0.0347	0.034	0.0345	0.034	0.0364	0.0355	0.0342	0.0337	0.034
	600	0.0325	0.0412	0.0342	0.0366	0.0375	0.0357	0.0346	0.0366	0.039	0.034	0.0365	0.0348	0.0372	0.0338	0.0371	0.0416	0.0349	0.0326	0.0343	0.0427	0.0371	0.0358	0.0366	0.0344	0.0446	0.0346	0.0343	0.0344	0.0353	0.0341	0.0322	0.0322	0.0421	0.0348	0.0334	0.0343	0.041	0.035	0.035	0.0354	0.0343	0.0349	0.0341	0.0371	0.0353	0.0354	0.0337	0.0347
	605	0.0323	0.0405	0.0355	0.0345	0.0368	0.0351	0.0349	0.0359	0.0376	0.0337	0.0354	0.0345	0.0354	0.0335	0.0353	0.0413	0.0329	0.0319	0.0337	0.0406	0.0347	0.0344	0.035	0.0339	0.0432	0.0339	0.0325	0.0331	0.0341	0.0327	0.0311	0.0317	0.0398	0.0338	0.0328	0.0329	0.0392	0.0342	0.034	0.0329	0.0332	0.0332	0.0331	0.0362	0.0334	0.0343	0.0336	0.0335
	610	0.0336	0.0397	0.0352	0.0354	0.0378	0.0343	0.0337	0.0363	0.0382	0.0339	0.0347	0.0357	0.0355	0.0332	0.0352	0.0415	0.0341	0.0344	0.0353	0.0407	0.0364	0.0342	0.036	0.035	0.0438	0.0343	0.0331	0.0339	0.0348	0.0337	0.0314	0.0313	0.0405	0.0348	0.0338	0.0342	0.04	0.0353	0.0356	0.0341	0.0342	0.0339	0.0349	0.0369	0.035	0.0344	0.0325	0.0327
	615	0.033	0.0395	0.0344	0.0344	0.0371	0.0345	0.0346	0.036	0.0386	0.0336	0.0347	0.0353	0.0355	0.0334	0.0355	0.0421	0.0336	0.0338	0.0337	0.0414	0.0354	0.0346	0.0345	0.035	0.0422	0.0351	0.0339	0.0336	0.0335	0.0336	0.0315	0.0304	0.0394	0.0352	0.0336	0.0339	0.0403	0.0346	0.0349	0.0336	0.0347	0.0336	0.0346	0.037	0.0344	0.0342	0.0332	0.0326
	620	0.0327	0.039	0.0327	0.0332	0.036	0.0342	0.033	0.0347	0.0383	0.0319	0.0356	0.0338	0.0346	0.0329	0.0332	0.0394	0.0315	0.0324	0.0318	0.0417	0.0344	0.0339	0.0338	0.0335	0.0411	0.0327	0.0333	0.032	0.0336	0.0321	0.0311	0.031	0.039	0.0337	0.0326	0.0319	0.0388	0.0328	0.0329	0.0324	0.0327	0.0331	0.0327	0.0357	0.0331	0.0336	0.0326	0.032
	625	0.0329	0.04	0.0343	0.0344	0.0368	0.0347	0.0343	0.0347	0.0393	0.0328	0.036	0.0328	0.0349	0.0336	0.0348	0.04	0.0329	0.0318	0.0334	0.0411	0.035	0.0348	0.0346	0.0351	0.0425	0.0325	0.0326	0.0326	0.0331	0.0334	0.03	0.0316	0.04	0.0343	0.0322	0.0331	0.0396	0.0335	0.0341	0.0345	0.0347	0.0335	0.0337	0.0349	0.0338	0.0342	0.0344	0.034
	630	0.0322	0.0399	0.0331	0.033	0.0362	0.0343	0.034	0.0348	0.0382	0.0311	0.035	0.0338	0.035	0.0335	0.0344	0.04	0.0332	0.032	0.0331	0.0397	0.0344	0.0341	0.0339	0.0341	0.0415	0.0334	0.0329	0.0329	0.0334	0.0336	0.0305	0.0312	0.0404	0.0327	0.0325	0.033	0.0402	0.0337	0.0338	0.0326	0.0339	0.0327	0.0338	0.0356	0.034	0.0346	0.0337	0.0327
	635	0.031	0.0383	0.0323	0.0327	0.0346	0.0333	0.0326	0.0341	0.0375	0.03	0.0348	0.0322	0.033	0.0322	0.0327	0.0387	0.0313	0.0306	0.0305	0.0399	0.0336	0.0337	0.0339	0.0316	0.0391	0.0314	0.0318	0.0312	0.0314	0.0326	0.0294	0.0296	0.0378	0.0322	0.0314	0.0316	0.0378	0.0321	0.0328	0.0321	0.0328	0.0316	0.0316	0.0341	0.0337	0.0327	0.0326	0.0323
	640	0.033	0.039	0.0343	0.0333	0.0366	0.0339	0.0335	0.0347	0.0386	0.0326	0.0353	0.0332	0.0345	0.0328	0.0355	0.0414	0.0325	0.0323	0.0328	0.04	0.0353	0.034	0.0339	0.0335	0.0426	0.0336	0.0327	0.0337	0.0341	0.0336	0.0308	0.0312	0.0393	0.0333	0.0325	0.033	0.0392	0.0342	0.0352	0.0333	0.0345	0.0329	0.0347	0.0365	0.0342	0.0346	0.0343	0.0333
	645	0.0308	0.0373	0.0316	0.032	0.035	0.0319	0.0317	0.0332	0.0362	0.0295	0.0336	0.0315	0.0323	0.0305	0.0332	0.0381	0.0305	0.03	0.0313	0.0401	0.0331	0.0321	0.032	0.0316	0.041	0.0312	0.0316	0.0316	0.0317	0.0312	0.029	0.0294	0.0362	0.0319	0.0321	0.0319	0.0369	0.0317	0.0318	0.0322	0.0316	0.0318	0.0314	0.0334	0.0327	0.0321	0.0325	0.0316
	650	0.0301	0.0377	0.033	0.0319	0.0345	0.0318	0.0314	0.0329	0.0363	0.0299	0.0343	0.0316	0.0327	0.03	0.0323	0.0396	0.0307	0.0314	0.0312	0.04	0.0323	0.0324	0.033	0.0323	0.0396	0.0314	0.031	0.0303	0.032	0.0306	0.0294	0.0295	0.0375	0.0326	0.0309	0.0319	0.0363	0.0311	0.0322	0.0322	0.0326	0.0328	0.0315	0.0341	0.032	0.0332	0.0334	0.0314
	655	0.0312	0.0373	0.0321	0.031	0.0338	0.0322	0.0325	0.033	0.0365	0.0296	0.0339	0.0315	0.0321	0.0304	0.0328	0.0397	0.0306	0.0315	0.0313	0.0387	0.0329	0.0334	0.0328	0.0322	0.0397	0.0314	0.0315	0.0301	0.0326	0.0326	0.0293	0.0304	0.0377	0.0328	0.0315	0.0318	0.038	0.0326	0.0332	0.0325	0.0331	0.0321	0.0327	0.0348	0.0324	0.0333	0.0333	0.032
	660	0.0299	0.0367	0.0318	0.0309	0.0348	0.0305	0.0312	0.0325	0.0358	0.0303	0.0325	0.0314	0.0322	0.0304	0.0327	0.0385	0.0307	0.0312	0.0311	0.0388	0.0343	0.0327	0.0326	0.0319	0.0399	0.0317	0.0309	0.0313	0.0315	0.0312	0.0296	0.0299	0.037	0.0311	0.0306	0.0323	0.0385	0.0328	0.0317	0.0317	0.0326	0.032	0.0318	0.0348	0.0311	0.033	0.0318	0.0311
	665	0.0313	0.0393	0.0336	0.0328	0.0362	0.0326	0.0339	0.0344	0.0371	0.0318	0.0344	0.0344	0.0337	0.0323	0.0343	0.0407	0.0322	0.0322	0.0323	0.0396	0.0353	0.0341	0.0343	0.0339	0.0401	0.0336	0.0322	0.0332	0.0341	0.0329	0.0307	0.0317	0.0381	0.033	0.0322	0.0332	0.04	0.0341	0.0343	0.0328	0.0344	0.0324	0.0337	0.036	0.0334	0.0343	0.0347	0.0332
	670	0.0317	0.0389	0.0326	0.0336	0.0346	0.0317	0.0327	0.0339	0.0383	0.0312	0.0344	0.0324	0.0328	0.0321	0.0336	0.0403	0.0328	0.0319	0.0326	0.04	0.0344	0.0333	0.0332	0.0338	0.04	0.0329	0.0325	0.0316	0.0338	0.0343	0.0311	0.031	0.038	0.0341	0.0333	0.0332	0.039	0.034	0.0329	0.0329	0.033	0.0334	0.0331	0.0354	0.0326	0.0335	0.033	0.034
	675	0.0315	0.0381	0.033	0.032	0.0354	0.0305	0.0312	0.0335	0.0359	0.03	0.0332	0.032	0.0319	0.0313	0.0337	0.039	0.0314	0.0302	0.0312	0.04	0.0329	0.0325	0.0342	0.033	0.0406	0.0326	0.0321	0.0312	0.0326	0.0325	0.03	0.0298	0.038	0.0326	0.0327	0.0336	0.0386	0.0335	0.0336	0.033	0.0317	0.0343	0.0307	0.0346	0.0331	0.0331	0.0326	0.0329
	680	0.0315	0.0378	0.0321	0.0329	0.036	0.0312	0.0329	0.0337	0.0368	0.0318	0.0338	0.0332	0.0332	0.0311	0.0342	0.0394	0.0327	0.032	0.0324	0.0397	0.0345	0.0331	0.0338	0.0336	0.0407	0.0329	0.0316	0.0326	0.0342	0.0334	0.0308	0.0315	0.038	0.0329	0.0329	0.0332	0.0386	0.0335	0.0338	0.0333	0.0326	0.0341	0.032	0.035	0.0333	0.034	0.0336	0.0327
	685	0.0309	0.0384	0.0327	0.0324	0.0369	0.0311	0.0317	0.0342	0.0363	0.0316	0.034	0.0334	0.0324	0.0312	0.0341	0.0401	0.0332	0.0317	0.0322	0.0388	0.0343	0.0338	0.0324	0.0323	0.0383	0.0324	0.0318	0.0327	0.0341	0.0328	0.0309	0.0302	0.0385	0.0327	0.0332	0.0332	0.0381	0.033	0.0343	0.0339	0.0328	0.0333	0.0331	0.0365	0.0326	0.0337	0.0327	0.0321
	690	0.0314	0.0389	0.0338	0.0326	0.0357	0.0322	0.032	0.0333	0.0366	0.0315	0.0339	0.0335	0.0336	0.0314	0.0342	0.0409	0.0323	0.0325	0.0324	0.0392	0.0354	0.0341	0.0338	0.0343	0.0396	0.0312	0.0307	0.0318	0.0321	0.0336	0.032	0.0312	0.0384	0.0335	0.0335	0.033	0.0404	0.0324	0.035	0.0332	0.0338	0.0338	0.0332	0.0357	0.0344	0.036	0.0345	0.0334
	695	0.0305	0.0366	0.0313	0.0316	0.035	0.0301	0.0302	0.0324	0.0352	0.0295	0.0325	0.0321	0.0318	0.0309	0.0333	0.0398	0.0319	0.0307	0.0312	0.0374	0.0322	0.0321	0.0316	0.0325	0.0391	0.0319	0.031	0.0316	0.032	0.0317	0.03	0.0306	0.0387	0.0342	0.0317	0.0326	0.038	0.0318	0.0333	0.0321	0.0315	0.0322	0.0321	0.0356	0.0326	0.0331	0.0329	0.0325
	700	0.0305	0.0379	0.0332	0.034	0.0368	0.0315	0.0335	0.0351	0.0374	0.0335	0.0342	0.0349	0.0327	0.0332	0.0345	0.0421	0.0324	0.0329	0.0337	0.0394	0.0353	0.0337	0.0349	0.0348	0.0412	0.034	0.0332	0.0342	0.0353	0.0339	0.0318	0.0318	0.0387	0.0354	0.0344	0.0341	0.0406	0.0345	0.0347	0.0351	0.0342	0.0352	0.0338	0.0363	0.034	0.0354	0.0346	0.0343
	705	0.0304	0.0378	0.0317	0.0325	0.0365	0.0307	0.0328	0.0335	0.0373	0.0317	0.034	0.0334	0.032	0.0316	0.0334	0.0404	0.0314	0.0328	0.033	0.039	0.0331	0.0329	0.0333	0.0332	0.04	0.033	0.0319	0.0329	0.0335	0.0323	0.03	0.0305	0.0388	0.033	0.0326	0.0334	0.0394	0.0336	0.0331	0.0339	0.0337	0.0317	0.0334	0.036	0.0333	0.0336	0.0331	0.0327
	710	0.0325	0.0389	0.0341	0.0338	0.0361	0.03	0.0328	0.0333	0.0369	0.0305	0.0338	0.0325	0.0335	0.0312	0.0338	0.0397	0.0321	0.0323	0.033	0.0402	0.0349	0.0332	0.0342	0.0329	0.0396	0.0319	0.0327	0.0322	0.0345	0.034	0.0316	0.0327	0.0391	0.0354	0.0331	0.0343	0.0381	0.033	0.0347	0.0341	0.0328	0.0333	0.0338	0.0368	0.0347	0.0357	0.0354	0.0329
	715	0.0328	0.04	0.0337	0.0346	0.0372	0.0317	0.0333	0.0336	0.0374	0.0309	0.0349	0.0329	0.0325	0.0315	0.0344	0.0381	0.0331	0.0313	0.0329	0.0409	0.035	0.0336	0.0336	0.034	0.0397	0.0328	0.0335	0.0318	0.034	0.0333	0.0332	0.0334	0.0409	0.0363	0.0345	0.0351	0.0411	0.0348	0.0351	0.0347	0.0348	0.0353	0.0351	0.0366	0.0357	0.0368	0.0358	0.035
	720	0.0312	0.0396	0.0347	0.0343	0.0367	0.0297	0.0335	0.0339	0.0381	0.0319	0.0345	0.0326	0.033	0.0312	0.0356	0.0409	0.032	0.0323	0.0344	0.0408	0.0355	0.0339	0.0335	0.0331	0.0401	0.0343	0.0319	0.0324	0.0346	0.0353	0.0337	0.0336	0.0417	0.036	0.0353	0.0351	0.0402	0.0338	0.0369	0.035	0.0348	0.0359	0.0342	0.0369	0.0356	0.0358	0.0357	0.0347
	725	0.033	0.0415	0.0358	0.0367	0.0389	0.0321	0.0342	0.0367	0.0399	0.0328	0.0363	0.0352	0.0352	0.0336	0.0358	0.0418	0.0345	0.0339	0.0349	0.043	0.0355	0.0367	0.0369	0.0356	0.0425	0.0352	0.0342	0.0338	0.0362	0.0364	0.0346	0.0352	0.0426	0.0382	0.0373	0.0358	0.0433	0.037	0.0375	0.0375	0.0355	0.0369	0.0366	0.0394	0.037	0.0393	0.0374	0.038
	730	0.0341	0.0426	0.0372	0.0368	0.0405	0.0345	0.0375	0.039	0.0416	0.0375	0.0381	0.0377	0.0377	0.0372	0.0386	0.0448	0.0371	0.0365	0.0378	0.0448	0.0386	0.0372	0.0385	0.0377	0.0442	0.0377	0.0362	0.037	0.0377	0.0376	0.0367	0.0358	0.0437	0.0387	0.0379	0.0373	0.0435	0.0387	0.0382	0.0385	0.0375	0.0383	0.0385	0.0403	0.0396	0.0393	0.0388	0.038
	735	0.0355	0.0445	0.0369	0.0384	0.0434	0.0352	0.0391	0.0404	0.0414	0.0387	0.0397	0.0401	0.0381	0.0385	0.0405	0.0453	0.039	0.0376	0.0396	0.0451	0.0402	0.0381	0.0397	0.0392	0.0455	0.0388	0.0382	0.0391	0.0392	0.0371	0.0384	0.0363	0.0448	0.0402	0.0391	0.0384	0.045	0.0393	0.039	0.039	0.0386	0.0392	0.0399	0.0423	0.0391	0.0402	0.0389	0.0387
	740	0.0392	0.0455	0.042	0.0419	0.0454	0.0394	0.042	0.0443	0.0441	0.0418	0.0426	0.0428	0.0418	0.0404	0.0423	0.0493	0.0413	0.0418	0.042	0.0481	0.0442	0.0428	0.0426	0.0427	0.0472	0.0408	0.0409	0.0416	0.0434	0.0411	0.0407	0.0408	0.0489	0.0431	0.0425	0.0429	0.0485	0.0428	0.0428	0.0427	0.0423	0.0427	0.0419	0.0455	0.0421	0.0434	0.0434	0.0425
	745	0.0381	0.046	0.0416	0.0405	0.0462	0.0392	0.0419	0.043	0.0447	0.0403	0.0428	0.0425	0.0418	0.0398	0.0424	0.0487	0.0397	0.0412	0.0415	0.0474	0.0429	0.0419	0.0421	0.0415	0.0484	0.0408	0.0407	0.0424	0.0432	0.0415	0.0408	0.0404	0.0471	0.0433	0.0435	0.0425	0.0494	0.0424	0.0427	0.042	0.0408	0.0425	0.0423	0.0454	0.0417	0.0436	0.0422	0.0419
	750	0.0381	0.0455	0.0421	0.0405	0.0452	0.0385	0.0419	0.0435	0.0458	0.041	0.0435	0.0431	0.0411	0.039	0.0425	0.0487	0.0414	0.0419	0.0423	0.0479	0.0428	0.0415	0.0428	0.0416	0.0486	0.0423	0.0408	0.043	0.0439	0.0426	0.0401	0.0407	0.0482	0.0434	0.0435	0.0423	0.0489	0.0416	0.0422	0.0425	0.0407	0.0427	0.0428	0.0445	0.043	0.0419	0.0424	0.0419
	755	0.0371	0.0457	0.0416	0.04	0.0446	0.0369	0.0411	0.0424	0.0448	0.0412	0.0429	0.0433	0.041	0.0393	0.0418	0.0482	0.0416	0.0404	0.0426	0.0481	0.0419	0.0414	0.0417	0.0409	0.0472	0.0416	0.0413	0.0411	0.042	0.042	0.0415	0.0405	0.0482	0.0429	0.0421	0.0412	0.0478	0.041	0.042	0.0413	0.0417	0.0427	0.0424	0.0438	0.0413	0.0436	0.0419	0.0428
	760	0.0371	0.0458	0.0395	0.0409	0.0442	0.0363	0.0404	0.0427	0.0438	0.041	0.041	0.0421	0.0407	0.0396	0.0421	0.0477	0.0406	0.0391	0.041	0.0472	0.043	0.041	0.043	0.0412	0.0464	0.0416	0.0404	0.04	0.0417	0.0401	0.0406	0.0396	0.0472	0.0427	0.0411	0.0413	0.0474	0.0412	0.042	0.0417	0.0409	0.0421	0.0419	0.0445	0.041	0.0418	0.0425	0.0422
	765	0.0365	0.0444	0.0386	0.0397	0.0443	0.0355	0.0389	0.0419	0.0436	0.0391	0.0419	0.0425	0.0391	0.0393	0.04	0.0467	0.0399	0.0397	0.0416	0.0469	0.0425	0.0411	0.0404	0.0427	0.0475	0.0414	0.0409	0.0403	0.0413	0.0408	0.0394	0.039	0.0483	0.0417	0.0414	0.04	0.0478	0.0422	0.042	0.041	0.0408	0.0408	0.0415	0.0438	0.042	0.0417	0.0423	0.0423
	770	0.0379	0.0456	0.0406	0.0413	0.0462	0.0379	0.0401	0.0435	0.0443	0.0411	0.0419	0.0429	0.0417	0.0403	0.0418	0.0489	0.0411	0.0417	0.0432	0.0472	0.0431	0.0422	0.043	0.0418	0.0478	0.0414	0.0405	0.0416	0.0421	0.0419	0.0409	0.0408	0.0479	0.0433	0.0417	0.0431	0.0478	0.042	0.0434	0.0432	0.0421	0.0426	0.043	0.0446	0.0429	0.0424	0.0425	0.0432
	775	0.0364	0.0456	0.0401	0.0418	0.0449	0.0371	0.0408	0.0434	0.0452	0.0407	0.0431	0.0432	0.0405	0.0387	0.0425	0.048	0.0399	0.0403	0.043	0.0465	0.042	0.0419	0.0423	0.0424	0.0468	0.0405	0.0403	0.0416	0.042	0.0422	0.0402	0.0387	0.0485	0.0433	0.0423	0.043	0.0485	0.0426	0.0422	0.0424	0.0413	0.0428	0.0424	0.0446	0.0415	0.0431	0.0425	0.0427
	780	0.0376	0.0439	0.0387	0.0397	0.044	0.0365	0.0406	0.0424	0.0444	0.0399	0.0421	0.0439	0.0398	0.0394	0.0411	0.0469	0.039	0.0394	0.0421	0.0463	0.042	0.0413	0.0422	0.0414	0.0465	0.0403	0.0407	0.0425	0.0417	0.0402	0.0403	0.0388	0.0481	0.0438	0.0419	0.0421	0.0482	0.042	0.0415	0.0422	0.0418	0.0423	0.0421	0.0448	0.0424	0.0423	0.0418	0.0412
	785	0.0354	0.0424	0.0382	0.037	0.0426	0.0348	0.0383	0.0413	0.043	0.0375	0.0404	0.0417	0.0386	0.0378	0.0401	0.0468	0.0384	0.0375	0.0391	0.0456	0.0405	0.0387	0.0396	0.0408	0.0451	0.0404	0.038	0.0384	0.0409	0.0389	0.0386	0.0372	0.0466	0.0411	0.0398	0.039	0.0462	0.0411	0.04	0.0402	0.0407	0.0396	0.0397	0.0424	0.0401	0.0399	0.0403	0.0394
	790	0.0359	0.0435	0.0386	0.0407	0.0443	0.0352	0.0399	0.042	0.0441	0.0401	0.0421	0.0423	0.0389	0.0388	0.0408	0.0472	0.0401	0.0393	0.0413	0.0467	0.0432	0.0418	0.0417	0.0412	0.0464	0.0413	0.0404	0.0415	0.0423	0.0414	0.0397	0.0376	0.0471	0.0421	0.0412	0.0416	0.0466	0.0411	0.0421	0.041	0.0415	0.0415	0.0416	0.044	0.0408	0.0415	0.0413	0.0408
	795	0.0339	0.0427	0.0373	0.0386	0.042	0.0322	0.0382	0.0412	0.0417	0.0386	0.0393	0.0411	0.0385	0.0367	0.0385	0.0468	0.0376	0.0376	0.0383	0.0446	0.0412	0.04	0.0404	0.0402	0.0454	0.0395	0.0385	0.0392	0.0413	0.0394	0.0382	0.037	0.0458	0.04	0.039	0.0402	0.0446	0.0403	0.0399	0.0403	0.0404	0.0403	0.0397	0.0414	0.0398	0.0402	0.0407	0.0393
	800	0.0339	0.0428	0.0374	0.0376	0.0428	0.0345	0.0384	0.0404	0.0429	0.0388	0.0417	0.0404	0.0382	0.0365	0.0406	0.0463	0.0384	0.0389	0.0399	0.0458	0.0404	0.04	0.0397	0.04	0.0462	0.0409	0.0391	0.0403	0.0418	0.0397	0.0378	0.0372	0.0463	0.041	0.0405	0.0397	0.0461	0.0401	0.0405	0.0404	0.0402	0.0399	0.0395	0.0424	0.04	0.0406	0.0398	0.0404
[truncated: 152 more columns]

## Sheet: Figure 3
	Rutin Calibration Curve, Run 1																					Rutin Calibration Curve, Run 2																					Rutin Calibration Curve, Run 3
	0 mM Rutin = 300 μL DMSO																					0 mM Rutin = 300 μL DMSO																					0 mM Rutin = 300 μL DMSO
	[Rutin] (mM)	0	0.000366211	0.000732422	0.00146484	0.00292969	0.00585938	0.0117188	0.0234375	0.046875	0.09375	0.1875	0.375	0.75	1.5	3	6	12	24	48		[Rutin] (mM)	0	0.000366211	0.000732422	0.00146484	0.00292969	0.00585938	0.0117188	0.0234375	0.046875	0.09375	0.1875	0.375	0.75	1.5	3	6	12	24	48		[Rutin] (mM)	0	0.000366211	0.000732422	0.00146484	0.00292969	0.00585938
	Wavelength (nm)	Absorbance																				Wavelength (nm)	Absorbance																				Wavelength (nm)	Absorbance
	300	0.3803	0.3743	0.3913	0.3734	0.3733	0.3944	0.4162	0.4322	0.4905	0.5974	0.8048	0.9948	1.1849	1.5733	2.0323	2.7061	3.3121	4	4		300	0.3704	0.3787	0.3753	0.3738	0.3701	0.3842	0.4122	0.4393	0.4768	0.6042	0.7827	0.9864	1.2046	1.5863	1.9804	2.7361	3.3738	4	4		300	0.3747	0.3914	0.3771	0.3828	0.3835	0.3897
	305	0.2903	0.2835	0.2959	0.2828	0.2851	0.3034	0.3222	0.344	0.4039	0.5098	0.7217	0.9255	1.1276	1.5225	1.9936	2.6925	3.3374	4	4		305	0.2793	0.2872	0.2845	0.2836	0.2828	0.2953	0.3217	0.3492	0.3928	0.5162	0.7029	0.919	1.1423	1.5347	1.9413	2.7265	3.408	4	4		305	0.2839	0.2958	0.2845	0.2893	0.2932	0.3006
	310	0.2503	0.2445	0.2536	0.2433	0.2458	0.2642	0.2829	0.3055	0.3697	0.4778	0.6976	0.9137	1.1287	1.5365	2.0256	2.7616	3.4307	4	4		310	0.241	0.2483	0.245	0.2438	0.2447	0.2571	0.2814	0.3128	0.3598	0.4854	0.6811	0.909	1.1401	1.5482	1.9745	2.7906	3.511	4	4		310	0.2444	0.2539	0.2452	0.2496	0.2522	0.2617
	315	0.2322	0.2261	0.2344	0.2245	0.2285	0.2466	0.2659	0.2907	0.3577	0.4706	0.7009	0.9288	1.1556	1.5811	2.09	2.8694	3.5692	4	4		315	0.2225	0.2304	0.2267	0.2256	0.2276	0.2398	0.265	0.2966	0.3484	0.4784	0.6841	0.925	1.1663	1.5921	2.0414	2.8944	3.5821	4	4		315	0.2259	0.2348	0.2271	0.231	0.2345	0.2447
	320	0.2153	0.209	0.217	0.2079	0.2132	0.2299	0.2516	0.2795	0.3513	0.4724	0.7174	0.965	1.2103	1.6629	2.2056	3.0347	3.7971	4	4		320	0.2054	0.2126	0.2101	0.2091	0.211	0.2239	0.2494	0.2851	0.3415	0.4796	0.7009	0.9604	1.2189	1.6741	2.1558	3.0429	3.8294	4	4		320	0.2088	0.2169	0.2093	0.2144	0.2191	0.2292
	325	0.202	0.1958	0.2026	0.1952	0.2011	0.2188	0.2402	0.2719	0.3504	0.481	0.7458	1.0178	1.2877	1.7768	2.3664	3.2954	4	4	4		325	0.1927	0.1991	0.1966	0.1965	0.1994	0.212	0.2395	0.2779	0.3409	0.4894	0.7317	1.0154	1.2952	1.7888	2.312	3.2935	4	4	4		325	0.1963	0.2025	0.1958	0.2013	0.2073	0.2166
	330	0.1906	0.1855	0.1919	0.1838	0.1905	0.2094	0.2317	0.2681	0.3515	0.4919	0.776	1.0721	1.365	1.8896	2.5271	3.516	4	4	4		330	0.1817	0.1889	0.185	0.1851	0.1906	0.2022	0.2316	0.2733	0.3432	0.5005	0.7628	1.0692	1.3711	1.9032	2.469	3.5633	4	4	4		330	0.1859	0.1914	0.1839	0.1898	0.1965	0.2076
	335	0.1795	0.1733	0.1791	0.1721	0.1804	0.1991	0.2224	0.2626	0.353	0.5067	0.8134	1.1364	1.456	2.0246	2.7187	3.7634	4	4	4		335	0.1701	0.1769	0.1735	0.1732	0.1792	0.1924	0.2233	0.2684	0.3461	0.515	0.8003	1.1344	1.4613	2.0371	2.6534	3.789	4	4	4		335	0.1742	0.1798	0.1737	0.1787	0.1848	0.1975
	340	0.169	0.1629	0.1677	0.161	0.1707	0.1903	0.2143	0.2577	0.355	0.517	0.8419	1.1888	1.5316	2.1362	2.8798	3.9183	4	4	4		340	0.16	0.1665	0.163	0.1639	0.1696	0.1827	0.2156	0.2625	0.3486	0.5259	0.8295	1.1877	1.5354	2.1514	2.81	4	4	4	4		340	0.1629	0.1687	0.1627	0.1684	0.1754	0.1878
	345	0.1599	0.1541	0.1598	0.1528	0.1631	0.1815	0.2079	0.2541	0.3566	0.5269	0.8691	1.2361	1.5995	2.2382	3.0252	4	4	4	4		345	0.1515	0.1576	0.1546	0.1544	0.1611	0.1757	0.2089	0.2586	0.3509	0.5364	0.8569	1.2354	1.6021	2.2533	2.9505	4	4	4	4		345	0.1553	0.1597	0.1546	0.1587	0.1678	0.1804
	350	0.153	0.1472	0.1521	0.1455	0.1559	0.1745	0.2024	0.2494	0.3555	0.5304	0.8821	1.2604	1.6361	2.2928	3.0852	4	4	4	4		350	0.1446	0.151	0.1475	0.1471	0.1558	0.17	0.2027	0.2548	0.3496	0.5388	0.8695	1.2596	1.6373	2.309	3.0361	4	4	4	4		350	0.1487	0.153	0.1468	0.1516	0.1612	0.1737
	355	0.1405	0.134	0.1382	0.1319	0.1431	0.1614	0.1891	0.2359	0.3425	0.5177	0.8691	1.2481	1.6236	2.28	3.0327	4	4	3.6212	4		355	0.1315	0.1374	0.1341	0.1341	0.1427	0.1563	0.1888	0.2413	0.3383	0.5255	0.8567	1.2484	1.6262	2.2942	2.9938	4	4	4	4		355	0.1358	0.139	0.1342	0.1383	0.1476	0.1603
	360	0.1201	0.1135	0.1178	0.1121	0.1224	0.1397	0.1659	0.2119	0.3157	0.4833	0.8212	1.1861	1.5503	2.1838	2.9357	3.6978	4	3.9867	4		360	0.1116	0.1162	0.1147	0.113	0.1215	0.1358	0.1651	0.2161	0.3114	0.4911	0.8095	1.1903	1.5513	2.1983	2.896	3.7298	3.868	4	4		360	0.1151	0.1177	0.113	0.1187	0.1267	0.1395
	365	0.0963	0.0902	0.0931	0.088	0.0987	0.1145	0.1391	0.1817	0.2799	0.4366	0.753	1.0959	1.4369	2.0291	2.7374	3.7109	4	4	4		365	0.088	0.0939	0.0897	0.089	0.0983	0.1101	0.1371	0.1854	0.277	0.4438	0.7405	1.0997	1.4359	2.0442	2.6881	3.7265	3.9729	4	3.8309		365	0.0921	0.0935	0.0891	0.0939	0.1027	0.114
	370	0.068	0.0612	0.0615	0.0598	0.0678	0.082	0.1035	0.1426	0.229	0.3657	0.6433	0.9443	1.2463	1.7591	2.3864	3.224	3.6527	3.7317	3.811		370	0.0596	0.064	0.0607	0.0603	0.0684	0.078	0.1018	0.1456	0.228	0.3719	0.6316	0.9485	1.2431	1.7741	2.3315	3.3151	3.6162	3.8551	3.6675		370	0.0629	0.0624	0.06	0.0648	0.0728	0.0823
	375	0.0514	0.0464	0.0459	0.045	0.0525	0.0651	0.083	0.1158	0.1881	0.3034	0.5345	0.7896	1.0432	1.4787	2.0085	2.7894	3.3828	3.6843	3.6379		375	0.0451	0.0495	0.0451	0.0462	0.0524	0.0607	0.0807	0.1173	0.187	0.3079	0.5243	0.7939	1.0418	1.4905	1.9652	2.821	3.3934	3.6488	3.687		375	0.0483	0.0466	0.0447	0.0498	0.057	0.0644
	380	0.0466	0.0416	0.0408	0.0393	0.0452	0.0563	0.0699	0.0962	0.1557	0.2487	0.4362	0.6429	0.8489	1.2069	1.6451	2.304	2.8897	3.66	3.5832		380	0.0385	0.0441	0.04	0.0404	0.0455	0.0518	0.0676	0.0976	0.155	0.2526	0.4297	0.6476	0.8472	1.2194	1.6045	2.3377	2.9242	3.5281	3.5703		380	0.0427	0.0414	0.0396	0.0441	0.0492	0.0558
	385	0.0462	0.0399	0.0397	0.0383	0.0429	0.0525	0.0628	0.0816	0.1281	0.198	0.3393	0.4955	0.6492	0.9286	1.2662	1.7817	2.2608	3.4008	3.5093		385	0.0383	0.0431	0.0395	0.0399	0.0438	0.0477	0.0596	0.083	0.1269	0.1993	0.3326	0.5	0.6508	0.9402	1.2323	1.8082	2.2988	3.2104	3.7452		385	0.0425	0.0406	0.0384	0.0433	0.0472	0.0514
	390	0.0458	0.0395	0.0388	0.0388	0.0414	0.049	0.0573	0.0703	0.1053	0.1548	0.2575	0.3711	0.4834	0.6916	0.9446	1.3383	1.7062	2.782	3.2265		390	0.038	0.0426	0.0398	0.04	0.0423	0.0453	0.0544	0.0713	0.1031	0.156	0.2512	0.3768	0.4841	0.7033	0.9187	1.3569	1.7313	2.5728	3.2307		390	0.0421	0.04	0.0376	0.0434	0.0459	0.0487
	395	0.0461	0.0405	0.0398	0.0387	0.0404	0.0476	0.0533	0.0609	0.0862	0.1191	0.1913	0.2702	0.3459	0.4997	0.6771	0.9605	1.2355	2.1291	2.5284		395	0.0389	0.0435	0.0398	0.04	0.0418	0.0439	0.0499	0.0613	0.0847	0.1201	0.1857	0.2735	0.3492	0.506	0.659	0.9799	1.2547	1.9035	2.537		395	0.0427	0.0412	0.0387	0.0441	0.0458	0.0466
	400	0.0436	0.038	0.0376	0.0374	0.0368	0.0434	0.0477	0.0516	0.0701	0.0913	0.1387	0.188	0.2366	0.3432	0.4638	0.6566	0.8414	1.4947	1.7603		400	0.0366	0.0398	0.0379	0.0383	0.0391	0.0392	0.044	0.053	0.0664	0.0908	0.1331	0.1927	0.24	0.3477	0.4483	0.6741	0.8521	1.3111	1.7677		400	0.041	0.0388	0.0367	0.0423	0.0428	0.0432
	405	0.0423	0.0361	0.037	0.0358	0.0364	0.0416	0.0442	0.0459	0.0585	0.0705	0.1006	0.1317	0.1593	0.2306	0.3063	0.432	0.5521	1.0157	1.1931		405	0.0357	0.04	0.0367	0.0378	0.0378	0.0375	0.0407	0.0476	0.0552	0.0701	0.0957	0.1337	0.1638	0.2353	0.2958	0.4474	0.5632	0.871	1.1928		405	0.0391	0.0371	0.0361	0.0408	0.041	0.0409
	410	0.0423	0.0365	0.0368	0.0365	0.0367	0.0415	0.0429	0.0438	0.0522	0.0594	0.0798	0.0989	0.1129	0.164	0.2127	0.2935	0.373	0.693	0.8087		410	0.0354	0.0398	0.0372	0.0374	0.0375	0.038	0.0392	0.0445	0.049	0.0587	0.0735	0.1013	0.118	0.1681	0.204	0.3086	0.3804	0.5853	0.8078		410	0.0394	0.038	0.0366	0.0412	0.0409	0.0397
	415	0.0411	0.0358	0.0361	0.0357	0.0358	0.0402	0.0408	0.0407	0.0483	0.0514	0.0622	0.073	0.0779	0.1112	0.1405	0.1862	0.2314	0.4267	0.4905		415	0.0348	0.038	0.0361	0.0367	0.0369	0.0356	0.0372	0.0422	0.0441	0.0497	0.0574	0.0736	0.0831	0.1174	0.133	0.1995	0.2355	0.3584	0.4932		415	0.0384	0.0368	0.0364	0.0407	0.0403	0.0395
	420	0.0408	0.0359	0.0351	0.0353	0.0344	0.0386	0.0395	0.0383	0.045	0.045	0.0519	0.0573	0.0597	0.0807	0.0969	0.1196	0.147	0.26	0.2986		420	0.0342	0.0381	0.0351	0.0362	0.0351	0.0345	0.0362	0.0398	0.0404	0.044	0.0476	0.0573	0.0639	0.0842	0.0899	0.1336	0.1502	0.2168	0.2964		420	0.0371	0.0357	0.0349	0.0402	0.0391	0.0383
	425	0.0412	0.0361	0.0362	0.0357	0.0352	0.0386	0.0397	0.0375	0.0439	0.0425	0.0491	0.0516	0.0505	0.0665	0.0777	0.0902	0.1065	0.1766	0.2025		425	0.0353	0.0394	0.0362	0.037	0.0355	0.0342	0.0361	0.0386	0.0395	0.0423	0.0442	0.0519	0.0548	0.0695	0.0706	0.1036	0.1095	0.1494	0.1993		425	0.0379	0.0363	0.0348	0.0417	0.0405	0.0383
	430	0.0409	0.0351	0.0367	0.0364	0.0379	0.0405	0.0415	0.0384	0.0455	0.043	0.0485	0.0492	0.0452	0.0591	0.0665	0.0726	0.0807	0.1185	0.1358		430	0.0357	0.0388	0.0363	0.0401	0.0381	0.0362	0.0372	0.04	0.0406	0.043	0.0424	0.0502	0.0492	0.0628	0.0599	0.0859	0.0833	0.1026	0.1318		430	0.0385	0.0372	0.0356	0.0415	0.0408	0.0394
	435	0.0411	0.0349	0.0354	0.0355	0.0369	0.0392	0.0402	0.0377	0.0446	0.0412	0.0449	0.045	0.041	0.0511	0.0564	0.0578	0.0626	0.0818	0.0932		435	0.0344	0.0384	0.0353	0.0386	0.0372	0.0355	0.0374	0.0388	0.0401	0.0414	0.0392	0.0465	0.0445	0.0546	0.0509	0.0709	0.0648	0.073	0.0895		435	0.0382	0.0362	0.0356	0.0409	0.0411	0.0385
	440	0.0405	0.0349	0.0353	0.0348	0.0345	0.0378	0.0387	0.0364	0.0422	0.039	0.042	0.0411	0.0382	0.0455	0.0503	0.0485	0.0527	0.0605	0.0701		440	0.0341	0.0379	0.0355	0.0378	0.0356	0.0347	0.0356	0.038	0.0374	0.0382	0.0376	0.0406	0.0415	0.048	0.0449	0.0616	0.0544	0.0564	0.066		440	0.0378	0.0356	0.0348	0.0398	0.0391	0.0374
	445	0.0402	0.035	0.0351	0.036	0.0354	0.0388	0.0384	0.0362	0.0425	0.0385	0.0412	0.0392	0.037	0.0429	0.0469	0.044	0.0459	0.0503	0.0578		445	0.0344	0.0381	0.0359	0.0375	0.0357	0.0348	0.0353	0.0379	0.0377	0.0386	0.0367	0.04	0.0402	0.0447	0.0416	0.0581	0.0476	0.0487	0.0549		445	0.0377	0.0366	0.0337	0.0399	0.0393	0.0371
	450	0.0397	0.035	0.0354	0.0345	0.0348	0.0389	0.0379	0.0361	0.042	0.0389	0.0406	0.0376	0.0367	0.0423	0.0452	0.0423	0.0434	0.0458	0.0517		450	0.0341	0.038	0.0354	0.0362	0.036	0.035	0.0352	0.0375	0.0364	0.038	0.037	0.0392	0.0391	0.0446	0.0393	0.0553	0.0445	0.0441	0.0482		450	0.0368	0.0369	0.0344	0.0395	0.0391	0.0372
	455	0.0399	0.0336	0.0352	0.0351	0.0365	0.0392	0.0385	0.037	0.0425	0.0388	0.0412	0.0383	0.0362	0.0431	0.0447	0.0413	0.0431	0.0427	0.0493		455	0.0346	0.0377	0.0355	0.0372	0.0374	0.0356	0.0356	0.0377	0.0374	0.0391	0.0369	0.039	0.038	0.0449	0.0398	0.0541	0.0436	0.041	0.0461		455	0.0373	0.036	0.0342	0.0407	0.0403	0.0388
	460	0.0393	0.0339	0.0342	0.0338	0.0349	0.0385	0.0376	0.036	0.0412	0.0372	0.0404	0.0369	0.0341	0.0404	0.0431	0.0389	0.0399	0.0393	0.0457		460	0.0339	0.0373	0.0348	0.0355	0.0371	0.0342	0.034	0.0372	0.0361	0.0373	0.0346	0.039	0.0375	0.0421	0.0372	0.0523	0.041	0.0387	0.0424		460	0.0373	0.0354	0.0329	0.039	0.039	0.0373
	465	0.039	0.033	0.0339	0.0344	0.0349	0.0394	0.0378	0.0351	0.0422	0.0378	0.0406	0.0377	0.0348	0.0416	0.0432	0.04	0.0391	0.0392	0.0443		465	0.033	0.0376	0.0344	0.0367	0.0371	0.0339	0.034	0.0369	0.0381	0.0386	0.0352	0.0404	0.0371	0.0439	0.0379	0.0527	0.0407	0.0371	0.0414		465	0.0366	0.0356	0.0332	0.0388	0.0393	0.0372
	470	0.0387	0.0334	0.0334	0.0341	0.0363	0.0393	0.0386	0.036	0.0437	0.0392	0.0408	0.0387	0.0355	0.0398	0.0429	0.0395	0.0384	0.0388	0.0438		470	0.0335	0.0356	0.0342	0.0363	0.0377	0.0342	0.0337	0.0366	0.0371	0.0386	0.0366	0.0406	0.0371	0.0441	0.0375	0.053	0.0408	0.0366	0.0413		470	0.0352	0.0365	0.0321	0.0385	0.0404	0.0377
	475	0.0378	0.0334	0.0336	0.0339	0.0376	0.0393	0.0387	0.0356	0.0436	0.04	0.0419	0.0393	0.0361	0.0408	0.0421	0.0392	0.0391	0.0397	0.0442		475	0.0335	0.0365	0.0348	0.0374	0.0386	0.0347	0.0363	0.0381	0.0377	0.0389	0.0378	0.0405	0.0377	0.0435	0.0376	0.052	0.0401	0.0358	0.0418		475	0.036	0.0362	0.033	0.0392	0.042	0.0375
	480	0.0377	0.031	0.0318	0.0344	0.039	0.0411	0.0395	0.0348	0.0448	0.0412	0.0438	0.0401	0.0355	0.0409	0.0428	0.0391	0.0402	0.038	0.0428		480	0.0333	0.0358	0.0331	0.0376	0.039	0.0362	0.0358	0.0374	0.0381	0.0394	0.038	0.0411	0.0376	0.0445	0.0392	0.0523	0.0404	0.0357	0.0419		480	0.0359	0.0363	0.0325	0.0396	0.0413	0.0395
	485	0.0378	0.0326	0.033	0.0335	0.035	0.0374	0.0359	0.0349	0.0402	0.0362	0.0394	0.0359	0.0334	0.0367	0.0409	0.0372	0.0369	0.0356	0.041		485	0.033	0.0359	0.034	0.0356	0.0352	0.0348	0.0345	0.0349	0.0361	0.0361	0.0352	0.0369	0.0366	0.0394	0.0355	0.0501	0.0376	0.0346	0.0376		485	0.0368	0.0352	0.0331	0.0378	0.0382	0.0363
	490	0.0384	0.0331	0.0342	0.0333	0.0339	0.0366	0.0366	0.0345	0.039	0.0367	0.0386	0.0363	0.0335	0.037	0.0402	0.0366	0.0368	0.0347	0.0404		490	0.033	0.0369	0.0341	0.0363	0.0355	0.0344	0.0347	0.0361	0.0355	0.0369	0.035	0.0368	0.0362	0.0398	0.0349	0.0498	0.0379	0.0341	0.0379		490	0.0366	0.0357	0.0329	0.0378	0.0376	0.0366
	495	0.0388	0.0339	0.0351	0.0348	0.0364	0.039	0.0396	0.0359	0.0436	0.0383	0.0414	0.0395	0.035	0.0399	0.0423	0.0385	0.0388	0.0359	0.0413		495	0.0334	0.0374	0.0346	0.0377	0.0381	0.0359	0.0353	0.0378	0.0377	0.0388	0.0372	0.0392	0.0369	0.0425	0.0367	0.0508	0.0394	0.0349	0.0394		495	0.0377	0.037	0.0338	0.0402	0.0411	0.0387
	500	0.0383	0.0331	0.0345	0.034	0.0368	0.0405	0.0384	0.0353	0.0438	0.039	0.0416	0.0394	0.0347	0.0384	0.0416	0.0377	0.0394	0.0352	0.0407		500	0.0345	0.0362	0.0336	0.0375	0.0376	0.0353	0.0361	0.0368	0.0376	0.0384	0.0373	0.0391	0.0365	0.0414	0.0356	0.0495	0.0383	0.0344	0.0386		500	0.037	0.0363	0.0333	0.0393	0.0407	0.0386
	505	0.039	0.0339	0.0358	0.0344	0.0365	0.0397	0.0384	0.035	0.0416	0.0383	0.0414	0.0383	0.0343	0.038	0.0423	0.0378	0.0387	0.0351	0.0404		505	0.0343	0.0364	0.0339	0.0378	0.0374	0.0348	0.0372	0.0375	0.0375	0.0385	0.0371	0.0382	0.0367	0.0406	0.0351	0.0489	0.0389	0.0342	0.0389		505	0.0366	0.0359	0.0336	0.0395	0.0404	0.0372
	510	0.0389	0.0345	0.0339	0.034	0.0344	0.0379	0.0365	0.034	0.0405	0.0372	0.04	0.0365	0.0334	0.0367	0.0403	0.0359	0.0369	0.0342	0.0397		510	0.0333	0.037	0.0334	0.0361	0.0354	0.0345	0.0353	0.0362	0.0359	0.0369	0.0343	0.0359	0.0366	0.0388	0.0357	0.0488	0.0379	0.0353	0.0366		510	0.0366	0.0352	0.0336	0.0385	0.0382	0.0368
	515	0.0395	0.0339	0.0353	0.0345	0.0362	0.039	0.0374	0.0355	0.0417	0.0385	0.0414	0.0382	0.0349	0.0383	0.0413	0.0377	0.0396	0.0355	0.0405		515	0.0344	0.0377	0.0345	0.0373	0.038	0.0356	0.0361	0.0368	0.0374	0.038	0.0365	0.038	0.0379	0.0421	0.035	0.051	0.0397	0.0342	0.0383		515	0.0387	0.0364	0.0342	0.0401	0.0408	0.0384
	520	0.0385	0.0334	0.0347	0.0341	0.0354	0.0382	0.0377	0.0348	0.0411	0.0366	0.0398	0.0363	0.0345	0.0365	0.04	0.0368	0.0373	0.0337	0.0396		520	0.0338	0.0372	0.0341	0.0362	0.0369	0.0343	0.0348	0.0366	0.0362	0.0373	0.0343	0.037	0.0367	0.0402	0.0356	0.049	0.0384	0.0336	0.037		520	0.038	0.0362	0.0335	0.0385	0.0402	0.0382
	525	0.0393	0.0345	0.0359	0.035	0.0382	0.0403	0.0387	0.0356	0.044	0.0389	0.0426	0.0389	0.037	0.0388	0.0426	0.0393	0.0392	0.0361	0.0409		525	0.0341	0.038	0.0341	0.0381	0.0392	0.036	0.0367	0.0389	0.0391	0.0393	0.0379	0.0404	0.0372	0.0417	0.0366	0.051	0.0395	0.0345	0.0375		525	0.0388	0.0367	0.0349	0.0415	0.0419	0.0396
	530	0.038	0.034	0.0337	0.0337	0.0338	0.0368	0.0356	0.0343	0.04	0.0354	0.0391	0.0363	0.0335	0.0359	0.04	0.0366	0.0362	0.0334	0.0397		530	0.0335	0.0369	0.0328	0.0363	0.0349	0.0342	0.0346	0.0347	0.0351	0.0358	0.0349	0.0364	0.0353	0.0379	0.0339	0.0483	0.037	0.0333	0.0349		530	0.0363	0.035	0.033	0.0376	0.039	0.0365
	535	0.0398	0.0357	0.036	0.0358	0.0361	0.0395	0.0382	0.0356	0.0422	0.0378	0.0415	0.0378	0.0358	0.0382	0.0425	0.0384	0.0378	0.036	0.0422		535	0.035	0.0384	0.0351	0.038	0.0367	0.036	0.0368	0.0373	0.0379	0.0382	0.0363	0.0385	0.0372	0.0407	0.0357	0.0499	0.039	0.035	0.038		535	0.039	0.0363	0.0352	0.0397	0.0403	0.0388
	540	0.0398	0.0348	0.036	0.0357	0.0365	0.0383	0.0371	0.0352	0.042	0.0382	0.0414	0.0377	0.0351	0.0378	0.0414	0.0376	0.0383	0.0354	0.0407		540	0.0345	0.0376	0.0349	0.0373	0.0372	0.0357	0.036	0.0373	0.0376	0.038	0.0362	0.0381	0.0375	0.0402	0.0368	0.0491	0.0392	0.0345	0.0375		540	0.0382	0.0355	0.0349	0.0395	0.0391	0.0383
	545	0.0381	0.0343	0.0348	0.0346	0.0363	0.0378	0.0371	0.0344	0.0423	0.0364	0.0398	0.0365	0.0339	0.0367	0.0407	0.0362	0.0373	0.0335	0.0397		545	0.0337	0.0371	0.0339	0.0366	0.0361	0.0352	0.0351	0.036	0.0366	0.0374	0.0353	0.0373	0.0362	0.0399	0.035	0.0488	0.0371	0.0332	0.0369		545	0.0366	0.0354	0.0338	0.0385	0.0382	0.0366
	550	0.039	0.0343	0.0364	0.0352	0.0389	0.0407	0.0398	0.0357	0.0449	0.0394	0.0429	0.04	0.0367	0.0395	0.0433	0.0397	0.039	0.0355	0.0419		550	0.0349	0.0384	0.0347	0.0387	0.0392	0.0368	0.0375	0.0376	0.0404	0.0391	0.0389	0.0406	0.0378	0.0413	0.0375	0.0511	0.0401	0.0346	0.0383		550	0.038	0.0369	0.0348	0.0411	0.0422	0.0395
	555	0.0394	0.0349	0.0354	0.0351	0.0388	0.0393	0.0387	0.0356	0.0433	0.0389	0.0422	0.0382	0.0347	0.0384	0.042	0.0386	0.0387	0.0348	0.0409		555	0.0344	0.0382	0.0355	0.0384	0.0393	0.037	0.0366	0.0388	0.0392	0.0392	0.0368	0.0388	0.0383	0.0405	0.037	0.0496	0.0395	0.034	0.0367		555	0.038	0.0366	0.0351	0.0402	0.0405	0.0386
	560	0.0387	0.0345	0.0355	0.036	0.0379	0.0389	0.0363	0.0347	0.0436	0.0383	0.0414	0.0374	0.0358	0.0373	0.0416	0.0383	0.0382	0.0357	0.0414		560	0.0349	0.0371	0.035	0.0378	0.0376	0.0361	0.0363	0.0373	0.0383	0.0381	0.0376	0.039	0.0373	0.0409	0.0357	0.0503	0.0396	0.0346	0.036		560	0.038	0.0361	0.0349	0.0396	0.0413	0.0384
	565	0.0405	0.0346	0.0363	0.0349	0.0373	0.0381	0.0375	0.0355	0.0428	0.0372	0.0416	0.0368	0.0348	0.0375	0.0403	0.0377	0.0378	0.035	0.0409		565	0.0348	0.0386	0.0345	0.0379	0.0361	0.0348	0.0356	0.0374	0.0371	0.0381	0.0366	0.0369	0.0374	0.0399	0.0352	0.0486	0.0383	0.0352	0.0373		565	0.0383	0.0354	0.0354	0.0396	0.0395	0.0386
	570	0.0373	0.0331	0.0345	0.0335	0.0355	0.0376	0.0371	0.033	0.0405	0.0364	0.0397	0.0366	0.0335	0.0353	0.0404	0.0362	0.037	0.034	0.0408		570	0.0333	0.036	0.0333	0.0349	0.0356	0.034	0.0342	0.0356	0.0362	0.0364	0.035	0.0372	0.0363	0.0378	0.035	0.0453	0.0377	0.0339	0.0362		570	0.0376	0.0335	0.033	0.0384	0.038	0.0373
	575	0.0393	0.0349	0.0358	0.0346	0.0363	0.0379	0.0371	0.0356	0.0421	0.0376	0.0403	0.0377	0.0349	0.0367	0.0413	0.0366	0.0376	0.034	0.0405		575	0.0344	0.0367	0.0358	0.037	0.0371	0.0357	0.0355	0.0358	0.0375	0.0381	0.0352	0.0375	0.0365	0.0397	0.0361	0.0471	0.0379	0.0349	0.0364		575	0.0381	0.0351	0.034	0.0397	0.0394	0.0373
	580	0.0376	0.0348	0.0361	0.0354	0.0386	0.0391	0.0384	0.0362	0.0421	0.0383	0.0416	0.0377	0.0354	0.0373	0.0421	0.0393	0.0387	0.0341	0.0402		580	0.0349	0.0381	0.0355	0.0376	0.0381	0.0367	0.0375	0.0371	0.039	0.0386	0.0378	0.0389	0.0379	0.0395	0.0362	0.0488	0.039	0.0347	0.0364		580	0.0377	0.0361	0.0352	0.0399	0.0397	0.0387
	585	0.0392	0.0352	0.0371	0.0358	0.0395	0.0403	0.0395	0.0374	0.0434	0.0404	0.0436	0.039	0.0363	0.0391	0.0441	0.0405	0.0391	0.0361	0.042		585	0.0349	0.0382	0.0353	0.0388	0.0383	0.0376	0.0385	0.0386	0.04	0.04	0.0395	0.0398	0.0387	0.0412	0.0376	0.0501	0.0404	0.0366	0.0388		585	0.0396	0.0362	0.0368	0.0412	0.0416	0.0398
	590	0.0383	0.0344	0.0359	0.0358	0.0374	0.0389	0.0379	0.0359	0.0419	0.0391	0.0409	0.0391	0.0354	0.0361	0.0419	0.0375	0.0373	0.0343	0.0407		590	0.0349	0.0378	0.0355	0.0373	0.0369	0.0361	0.0364	0.0372	0.0388	0.0379	0.0373	0.0379	0.0377	0.0398	0.0359	0.0466	0.039	0.0355	0.0365		590	0.038	0.0358	0.0351	0.0399	0.0397	0.038
	595	0.039	0.0349	0.0363	0.0352	0.0369	0.0383	0.0383	0.0359	0.0421	0.0379	0.0407	0.0374	0.0342	0.0364	0.0408	0.0374	0.0367	0.0348	0.0408		595	0.0355	0.0378	0.0348	0.0379	0.036	0.0352	0.0351	0.0365	0.0372	0.0373	0.0362	0.0371	0.0378	0.0387	0.0359	0.0455	0.0384	0.0352	0.036		595	0.0382	0.0356	0.0348	0.0393	0.0387	0.0369
	600	0.0399	0.0354	0.0361	0.0361	0.0408	0.0402	0.0402	0.037	0.0443	0.0414	0.0427	0.0402	0.0375	0.0382	0.044	0.0403	0.039	0.0366	0.042		600	0.0359	0.0378	0.0356	0.0396	0.0391	0.0374	0.0385	0.0381	0.0409	0.0399	0.0388	0.0403	0.0392	0.042	0.0369	0.048	0.0395	0.0377	0.038		600	0.04	0.0375	0.0361	0.0418	0.0418	0.041
	605	0.0384	0.0337	0.0365	0.0353	0.0384	0.0401	0.0389	0.0363	0.0433	0.0402	0.0415	0.0386	0.0361	0.0372	0.0428	0.04	0.0388	0.035	0.042		605	0.0347	0.0373	0.0353	0.0379	0.037	0.0367	0.038	0.0382	0.0403	0.0387	0.038	0.0393	0.0391	0.0408	0.0367	0.0477	0.038	0.0366	0.0384		605	0.0395	0.0357	0.0356	0.0406	0.0405	0.0389
	610	0.0387	0.0347	0.0368	0.0356	0.0385	0.0394	0.0396	0.0361	0.0429	0.0397	0.0414	0.0383	0.0347	0.0377	0.0421	0.0384	0.0379	0.0344	0.0416		610	0.0351	0.037	0.0358	0.0388	0.0368	0.0373	0.0368	0.0378	0.0401	0.0387	0.0376	0.039	0.0388	0.0404	0.0352	0.0471	0.0399	0.0358	0.0377		610	0.0378	0.036	0.0349	0.0405	0.0405	0.0377
	615	0.0386	0.0363	0.0368	0.0362	0.0394	0.0411	0.0398	0.0379	0.0444	0.0401	0.0424	0.0398	0.0357	0.0381	0.043	0.0405	0.0395	0.0371	0.0418		615	0.0356	0.0377	0.0362	0.0396	0.0395	0.0377	0.0395	0.0384	0.0394	0.0395	0.0398	0.0403	0.0389	0.0405	0.0375	0.0488	0.0407	0.0365	0.038		615	0.0397	0.0374	0.0347	0.0407	0.0416	0.0398
	620	0.0391	0.035	0.037	0.0356	0.0383	0.0409	0.0388	0.0374	0.0434	0.0399	0.0409	0.0383	0.0364	0.0375	0.0427	0.0396	0.0384	0.0347	0.042		620	0.0354	0.0373	0.0353	0.0381	0.0372	0.0366	0.0379	0.0381	0.0388	0.0382	0.0372	0.0395	0.0378	0.0391	0.0364	0.0482	0.0383	0.0357	0.0375		620	0.0389	0.0366	0.0354	0.0412	0.0412	0.0387
	625	0.0385	0.0336	0.0358	0.0357	0.0376	0.0395	0.0387	0.0365	0.0413	0.0383	0.0398	0.0377	0.0357	0.0355	0.0417	0.0381	0.0368	0.0355	0.0418		625	0.0347	0.0371	0.0347	0.0368	0.0371	0.0365	0.0364	0.0375	0.0374	0.0377	0.0364	0.037	0.038	0.0383	0.0369	0.0459	0.0384	0.0362	0.0373		625	0.0384	0.035	0.035	0.0398	0.0402	0.0373
	630	0.0381	0.0347	0.0356	0.0346	0.0363	0.0389	0.0386	0.0358	0.0407	0.0386	0.0398	0.0382	0.0347	0.0365	0.0416	0.0372	0.038	0.0342	0.0409		630	0.0341	0.0369	0.0349	0.0371	0.0366	0.0362	0.0365	0.0368	0.0371	0.0373	0.0357	0.0371	0.0375	0.0374	0.0351	0.0473	0.0381	0.0359	0.0368		630	0.0382	0.0356	0.0348	0.04	0.0397	0.038
	635	0.0367	0.034	0.0359	0.0341	0.0369	0.039	0.0371	0.035	0.0409	0.0381	0.0398	0.0367	0.0346	0.0359	0.0408	0.0366	0.0363	0.0341	0.0404		635	0.0342	0.0363	0.0346	0.0368	0.0351	0.0363	0.0349	0.0357	0.038	0.0376	0.0359	0.0368	0.0364	0.0376	0.0345	0.0481	0.0383	0.0349	0.0353		635	0.0381	0.0356	0.0337	0.0385	0.0386	0.0375
	640	0.0368	0.0345	0.0354	0.0343	0.0366	0.0385	0.0391	0.0358	0.0422	0.038	0.0401	0.0364	0.0349	0.0369	0.0398	0.0379	0.0362	0.0345	0.0412		640	0.0337	0.0366	0.0344	0.0369	0.0357	0.035	0.0372	0.037	0.0367	0.0373	0.036	0.0372	0.0378	0.0379	0.0353	0.0484	0.039	0.0347	0.0365		640	0.0381	0.035	0.0332	0.0382	0.0397	0.0375
	645	0.0379	0.0335	0.036	0.0344	0.0373	0.0382	0.0378	0.0359	0.0417	0.038	0.0404	0.0368	0.0352	0.0369	0.0409	0.0367	0.0363	0.035	0.0398		645	0.0333	0.0368	0.0344	0.0376	0.0365	0.0344	0.0365	0.0376	0.037	0.0371	0.0358	0.0384	0.0375	0.038	0.035	0.0478	0.0384	0.0348	0.0359		645	0.0373	0.0346	0.0335	0.0388	0.0387	0.0368
	650	0.0376	0.0335	0.0348	0.0348	0.036	0.0389	0.0376	0.036	0.042	0.0378	0.0403	0.0371	0.0341	0.0362	0.0404	0.0376	0.0372	0.0358	0.0406		650	0.0342	0.0359	0.0339	0.0372	0.0367	0.0349	0.0356	0.0363	0.0371	0.0368	0.0355	0.0373	0.0374	0.0383	0.0354	0.0481	0.0384	0.034	0.0368		650	0.0367	0.0364	0.0338	0.0391	0.0386	0.0373
	655	0.0369	0.0336	0.0353	0.0345	0.0364	0.0389	0.0382	0.0361	0.0406	0.0383	0.0395	0.0376	0.0342	0.0356	0.04	0.038	0.0375	0.0353	0.0411		655	0.0339	0.0365	0.0342	0.0373	0.0371	0.036	0.0357	0.0365	0.0379	0.0371	0.0371	0.0384	0.0378	0.0378	0.0344	0.0492	0.0368	0.0354	0.0358		655	0.0376	0.0362	0.0341	0.0402	0.0392	0.0371
	660	0.0365	0.034	0.0353	0.0336	0.0352	0.0373	0.0369	0.0346	0.0392	0.0357	0.0388	0.0361	0.0339	0.0352	0.0381	0.0359	0.036	0.0342	0.0407		660	0.0327	0.0362	0.0336	0.0361	0.0352	0.0347	0.0339	0.0353	0.0355	0.0359	0.0348	0.0365	0.0367	0.0369	0.0335	0.0486	0.0363	0.0347	0.035		660	0.0362	0.0351	0.0339	0.0385	0.0377	0.0363
	665	0.0369	0.0342	0.0356	0.0362	0.0377	0.0396	0.0393	0.0362	0.0418	0.0389	0.0408	0.0374	0.0354	0.0377	0.0401	0.0383	0.0371	0.0353	0.042		665	0.0342	0.0372	0.0336	0.0371	0.0375	0.036	0.037	0.0374	0.038	0.0387	0.0385	0.0376	0.0383	0.039	0.0357	0.0512	0.037	0.0364	0.0359		665	0.0374	0.0356	0.036	0.04	0.0407	0.0378
	670	0.0351	0.0326	0.0333	0.0336	0.0366	0.0368	0.0364	0.035	0.0396	0.036	0.0389	0.0368	0.0339	0.0362	0.0382	0.0366	0.0352	0.0336	0.0399		670	0.0325	0.0344	0.0331	0.035	0.0343	0.035	0.0346	0.0347	0.0365	0.0367	0.0353	0.036	0.036	0.0373	0.0336	0.0488	0.0362	0.0337	0.0348		670	0.0353	0.0334	0.0332	0.0367	0.0382	0.0365
	675	0.0345	0.0327	0.0328	0.0334	0.036	0.0384	0.0371	0.0348	0.0392	0.0369	0.0395	0.0361	0.0332	0.0356	0.0381	0.0367	0.0352	0.0336	0.0387		675	0.0319	0.0354	0.0338	0.0351	0.035	0.0338	0.0348	0.0349	0.0374	0.0368	0.035	0.0367	0.0363	0.0369	0.0343	0.05	0.0372	0.0344	0.034		675	0.036	0.0339	0.0333	0.0378	0.0385	0.0349
	680	0.0338	0.0319	0.0332	0.0319	0.0335	0.0356	0.0349	0.0332	0.0375	0.0353	0.0381	0.0341	0.0314	0.0327	0.037	0.0354	0.0345	0.0328	0.0392		680	0.0306	0.0343	0.0322	0.0348	0.0342	0.0329	0.0323	0.0335	0.0349	0.0344	0.0333	0.0351	0.0355	0.0353	0.032	0.0483	0.0348	0.0333	0.0334		680	0.0346	0.0335	0.0324	0.0359	0.0364	0.0336
	685	0.0347	0.0328	0.034	0.0328	0.034	0.0367	0.0363	0.0343	0.0389	0.0371	0.0381	0.0369	0.0328	0.0345	0.0379	0.0352	0.035	0.0342	0.0399		685	0.0319	0.0348	0.0322	0.0352	0.0339	0.034	0.0336	0.0354	0.0354	0.0352	0.0343	0.037	0.0359	0.0371	0.0334	0.0484	0.0359	0.0342	0.0352		685	0.0357	0.0338	0.0325	0.0368	0.0368	0.0351
	690	0.0365	0.0328	0.0353	0.0332	0.0352	0.0385	0.0368	0.0361	0.0397	0.0377	0.0383	0.0376	0.0347	0.0369	0.0392	0.0367	0.0372	0.0343	0.0418		690	0.0325	0.0355	0.032	0.0355	0.0362	0.035	0.0345	0.0354	0.0358	0.037	0.036	0.0364	0.0368	0.0374	0.0351	0.0493	0.0362	0.0361	0.0352		690	0.0368	0.0349	0.033	0.0381	0.0392	0.035
	695	0.0365	0.0333	0.0345	0.0346	0.0375	0.04	0.0397	0.0373	0.0412	0.0386	0.0415	0.0382	0.0344	0.0375	0.0394	0.0399	0.0375	0.0352	0.0412		695	0.0334	0.0363	0.0333	0.0374	0.0364	0.0357	0.0362	0.037	0.0369	0.0398	0.0369	0.0383	0.0376	0.0388	0.0358	0.0496	0.0374	0.0356	0.0358		695	0.0374	0.0344	0.0345	0.0383	0.0399	0.0374
	700	0.0356	0.0333	0.034	0.0339	0.0339	0.0366	0.0365	0.0348	0.0379	0.0361	0.0382	0.0356	0.0322	0.0356	0.0368	0.0359	0.0348	0.0335	0.0391		700	0.0322	0.0356	0.0328	0.0351	0.0343	0.0333	0.0346	0.0339	0.0361	0.0364	0.0346	0.0352	0.036	0.0356	0.0344	0.0492	0.0364	0.0333	0.0357		700	0.0359	0.0343	0.0329	0.0362	0.0369	0.0347
	705	0.036	0.0328	0.0355	0.033	0.036	0.0387	0.0373	0.0364	0.0405	0.0386	0.0394	0.0378	0.0333	0.0357	0.0382	0.0376	0.0376	0.0352	0.043		705	0.0326	0.0362	0.0339	0.0353	0.036	0.0362	0.0367	0.0364	0.0374	0.0383	0.0363	0.0382	0.0376	0.0383	0.0355	0.0516	0.038	0.0357	0.0366		705	0.038	0.0347	0.0346	0.0389	0.0384	0.038
	710	0.0365	0.0328	0.0349	0.0347	0.0383	0.0397	0.0373	0.0363	0.0409	0.0401	0.0401	0.0391	0.035	0.037	0.0401	0.0374	0.0374	0.0362	0.0428		710	0.0337	0.0364	0.0334	0.0365	0.038	0.0354	0.0362	0.0363	0.0379	0.0381	0.0374	0.0379	0.0388	0.0394	0.0363	0.0505	0.0378	0.0376	0.0375		710	0.0378	0.0358	0.035	0.039	0.0409	0.0373
	715	0.0386	0.0355	0.0369	0.0358	0.0404	0.0422	0.041	0.0381	0.0426	0.0426	0.0426	0.0415	0.0384	0.0396	0.0435	0.0408	0.0406	0.0383	0.0453		715	0.0354	0.0389	0.0352	0.0381	0.0408	0.0382	0.0387	0.0387	0.0397	0.0408	0.0393	0.0406	0.0398	0.0419	0.0391	0.0528	0.0407	0.0389	0.0398		715	0.04	0.0376	0.0366	0.0419	0.0427	0.0397
	720	0.0394	0.036	0.0365	0.0365	0.0394	0.0408	0.0398	0.0378	0.0407	0.0414	0.0427	0.0398	0.0371	0.0389	0.042	0.0397	0.0399	0.0385	0.0445		720	0.0349	0.0375	0.0359	0.0381	0.0395	0.0376	0.0376	0.0374	0.0391	0.04	0.0382	0.04	0.0392	0.0404	0.0381	0.0517	0.0408	0.0387	0.0381		720	0.0395	0.0373	0.0359	0.0395	0.0407	0.0393
	725	0.0392	0.0366	0.0382	0.0371	0.0391	0.0405	0.0403	0.0381	0.0424	0.0412	0.0425	0.0392	0.0375	0.0395	0.0407	0.0414	0.04	0.038	0.0442		725	0.0365	0.0372	0.036	0.0383	0.0392	0.0376	0.0389	0.0387	0.0402	0.0402	0.0381	0.0399	0.0395	0.041	0.0391	0.0528	0.0401	0.0384	0.0399		725	0.0394	0.0372	0.0368	0.0407	0.0418	0.0386
	730	0.0395	0.038	0.0388	0.0379	0.039	0.0412	0.0398	0.0382	0.0407	0.0419	0.0414	0.0393	0.0374	0.0395	0.0412	0.04	0.0397	0.038	0.0445		730	0.0364	0.0395	0.0368	0.0386	0.0384	0.0379	0.0391	0.0384	0.0392	0.0406	0.038	0.0406	0.0405	0.0406	0.0389	0.0519	0.041	0.038	0.0395		730	0.0408	0.038	0.0378	0.0403	0.0415	0.0381
	735	0.0415	0.0388	0.0403	0.0397	0.0396	0.0414	0.04	0.0395	0.0413	0.0418	0.042	0.041	0.0388	0.0404	0.0431	0.0412	0.0415	0.039	0.0469		735	0.0392	0.041	0.0378	0.0398	0.0392	0.0391	0.0393	0.0404	0.0397	0.0411	0.0394	0.041	0.0419	0.0421	0.0401	0.0518	0.0419	0.0392	0.0403		735	0.0423	0.0393	0.039	0.0417	0.0416	0.0387
	740	0.0436	0.0398	0.042	0.0404	0.0422	0.044	0.0414	0.0407	0.0429	0.0431	0.0445	0.0433	0.0395	0.0427	0.0444	0.0418	0.043	0.0413	0.0471		740	0.04	0.0434	0.0395	0.0422	0.0421	0.0414	0.0405	0.0421	0.0425	0.0422	0.0413	0.043	0.0433	0.0441	0.0422	0.0542	0.0439	0.0418	0.0428		740	0.0447	0.0407	0.0407	0.0424	0.0436	0.0398
	745	0.0453	0.0407	0.0417	0.0408	0.0417	0.0451	0.0424	0.0423	0.0445	0.0438	0.045	0.0432	0.0405	0.0422	0.0451	0.0438	0.0431	0.0422	0.0483		745	0.0412	0.0428	0.0401	0.0426	0.0425	0.041	0.0404	0.0417	0.0428	0.0434	0.0418	0.0423	0.0434	0.0449	0.0419	0.0542	0.0431	0.041	0.0428		745	0.0438	0.0417	0.0411	0.0445	0.043	0.0407
	750	0.044	0.0407	0.0412	0.0404	0.0417	0.0449	0.0429	0.0417	0.0437	0.0431	0.0458	0.0425	0.0407	0.0428	0.0452	0.0428	0.0421	0.0409	0.0475		750	0.0404	0.0434	0.0404	0.0424	0.0414	0.0407	0.04	0.041	0.0417	0.043	0.0416	0.043	0.0426	0.044	0.0419	0.0535	0.0424	0.0412	0.0418		750	0.0436	0.0404	0.0404	0.0445	0.0432	0.0427
	755	0.0435	0.0401	0.0404	0.0405	0.0413	0.0422	0.0423	0.0412	0.0432	0.0441	0.0451	0.0425	0.0399	0.0424	0.0456	0.0424	0.042	0.0412	0.0481		755	0.0404	0.0418	0.0407	0.0419	0.0422	0.0406	0.0408	0.0415	0.0414	0.0431	0.0415	0.0439	0.0424	0.0451	0.0424	0.0541	0.0436	0.0404	0.0425		755	0.0438	0.0403	0.0416	0.0439	0.0439	0.0414
	760	0.0425	0.0394	0.0418	0.0389	0.0414	0.0427	0.0422	0.042	0.0426	0.0448	0.0447	0.0432	0.0404	0.042	0.0451	0.0424	0.0429	0.0404	0.0482		760	0.0399	0.042	0.0407	0.0418	0.0406	0.0409	0.0415	0.0417	0.0414	0.0438	0.0412	0.0442	0.0435	0.0443	0.0416	0.0537	0.0427	0.0404	0.0418		760	0.0438	0.0401	0.0408	0.0418	0.0433	0.0403
	765	0.0419	0.0382	0.0402	0.0397	0.0407	0.0421	0.0411	0.0403	0.0419	0.0423	0.0426	0.0428	0.0405	0.0419	0.045	0.0413	0.0419	0.0394	0.0462		765	0.0395	0.0406	0.038	0.042	0.0408	0.0396	0.041	0.0409	0.0403	0.0422	0.04	0.0414	0.0415	0.0432	0.042	0.0522	0.0432	0.0395	0.0425		765	0.0441	0.0398	0.0407	0.0416	0.0412	0.0389
	770	0.0413	0.039	0.0408	0.0392	0.0409	0.0418	0.0418	0.0397	0.0419	0.0428	0.0433	0.0418	0.0398	0.0416	0.045	0.041	0.0418	0.0403	0.046		770	0.0393	0.0416	0.0376	0.0407	0.0398	0.0405	0.0396	0.0396	0.0401	0.0419	0.0397	0.0429	0.0414	0.0441	0.0419	0.0525	0.0416	0.0394	0.0407		770	0.0434	0.0397	0.041	0.0422	0.0414	0.0401
	775	0.0419	0.039	0.0406	0.0395	0.0404	0.041	0.041	0.0401	0.041	0.0413	0.042	0.0413	0.0396	0.0414	0.044	0.0409	0.0416	0.0404	0.0466		775	0.0402	0.0421	0.0391	0.0409	0.0398	0.04	0.039	0.0399	0.0415	0.0413	0.0405	0.0413	0.0413	0.0429	0.0417	0.0515	0.0415	0.0386	0.0402		775	0.0439	0.0397	0.0398	0.0427	0.0419	0.0398
	780	0.0412	0.039	0.0393	0.0385	0.0401	0.0418	0.0397	0.041	0.0402	0.0416	0.0437	0.0413	0.039	0.0406	0.0435	0.0403	0.0415	0.0394	0.046		780	0.039	0.042	0.0378	0.0407	0.0401	0.0396	0.0387	0.0397	0.041	0.0411	0.0397	0.0418	0.0415	0.0428	0.0421	0.052	0.0416	0.0389	0.0407		780	0.0436	0.0395	0.0397	0.0413	0.0413	0.0389
	785	0.0396	0.0377	0.0394	0.0378	0.0388	0.0404	0.0397	0.0388	0.0376	0.0416	0.0417	0.0413	0.0373	0.0399	0.0423	0.0402	0.0389	0.0385	0.045		785	0.0382	0.0399	0.037	0.0394	0.0395	0.0382	0.0386	0.0403	0.0378	0.0394	0.0394	0.0409	0.0408	0.042	0.0401	0.0511	0.0408	0.0389	0.0398		785	0.0414	0.0377	0.0395	0.0399	0.0398	0.0377
	790	0.0391	0.0368	0.0391	0.0376	0.0394	0.0387	0.04	0.0387	0.0392	0.041	0.0418	0.0406	0.0371	0.0407	0.043	0.0401	0.0399	0.0381	0.0447		790	0.0384	0.0398	0.0354	0.0386	0.0372	0.0384	0.0389	0.039	0.0384	0.0401	0.0387	0.041	0.0411	0.0416	0.0399	0.0503	0.0406	0.0396	0.0393		790	0.0418	0.0368	0.0405	0.0397	0.0407	0.0368
	795	0.039	0.037	0.0379	0.0371	0.0385	0.0396	0.0386	0.0384	0.0375	0.0394	0.0408	0.04	0.0361	0.0394	0.0416	0.0394	0.0383	0.0382	0.0431		795	0.0367	0.0388	0.0352	0.0382	0.0364	0.0373	0.0374	0.0386	0.0371	0.0403	0.0374	0.0398	0.0403	0.0415	0.0386	0.0487	0.0398	0.0379	0.0391		795	0.0419	0.0367	0.039	0.0396	0.0394	0.0364
	800	0.0388	0.0383	0.04	0.0379	0.0395	0.0399	0.0386	0.0394	0.0381	0.0407	0.041	0.0406	0.0378	0.0382	0.0424	0.0397	0.0402	0.0386	0.044		800	0.038	0.04	0.0361	0.0393	0.0382	0.0392	0.0384	0.0382	0.0378	0.0398	0.0395	0.0403	0.041	0.043	0.0396	0.0491	0.0413	0.0385	0.0387		800	0.0428	0.0387	0.0386	0.0404	0.0398	0.0381
[truncated: 13 more columns]

## Sheet: Figure 4
	Blank = 295 μL Water + 5 μL DMSO		Aluminum (μM) Calibration Curve 1					Lithium Replicates									Sodium Replicates									Potassium Replicates									Magnesium Replicates										Blank = 295 μL Water + 5 μL DMSO		Aluminum (μM) Calibration Curve 2
	Wavelength (nm)	Blank 1	0	1	2	4	8	8 μM			80 μM			800 μM			8 μM			80 μM			800 μM			8 μM			80 μM			800 μM			8 μM			80 μM			800 μM				Wavelength (nm)	Blank 2	0	1	2
	300	0.4253	1.5786	1.5557	1.5911	1.5743	1.6549	1.5647	1.5784	1.5932	1.5977	1.5919	1.571	1.6341	1.5898	1.6086	1.5075	1.5139	1.5872	1.5161	1.6321	1.6643	1.5771	1.5625	1.5891	1.5608	1.4977	1.5644	1.5249	1.5559	1.4317	1.5514	1.4709	1.5556	1.4058	1.4628	1.6086	1.5904	1.5588	1.5804	1.5906	1.6635	1.557		300	0.4395	1.5793	1.62	1.5873
	305	0.3065	1.4986	1.4759	1.5077	1.4929	1.5531	1.4906	1.4979	1.5172	1.5302	1.5162	1.4942	1.5511	1.5122	1.5336	1.4228	1.4364	1.5076	1.4329	1.5552	1.5839	1.5012	1.4872	1.5061	1.4885	1.4219	1.493	1.4574	1.4816	1.3496	1.4858	1.4016	1.4868	1.3192	1.3715	1.5336	1.5145	1.4858	1.5019	1.5117	1.5824	1.4646		305	0.3216	1.5054	1.5494	1.5105
	310	0.2544	1.4984	1.4741	1.5049	1.4906	1.5408	1.4939	1.4975	1.5214	1.5359	1.5201	1.4965	1.5494	1.5138	1.5371	1.4179	1.4354	1.5092	1.4277	1.5594	1.5852	1.5026	1.4877	1.5038	1.4922	1.4261	1.4969	1.4621	1.4823	1.3442	1.4926	1.4038	1.492	1.3116	1.3612	1.5371	1.5162	1.4889	1.5021	1.5121	1.5821	1.458		310	0.2698	1.5085	1.5525	1.5095
	315	0.2288	1.5322	1.5079	1.5358	1.5213	1.5683	1.5283	1.532	1.5567	1.5743	1.5549	1.5308	1.5823	1.5472	1.5734	1.4488	1.4672	1.5428	1.4573	1.5961	1.6207	1.5367	1.5202	1.5348	1.5296	1.4585	1.533	1.4975	1.5184	1.3702	1.5296	1.4349	1.5277	1.3348	1.3843	1.5734	1.5511	1.5235	1.5345	1.5425	1.616	1.4871		315	0.2459	1.543	1.5907	1.5437
	320	0.2068	1.6046	1.5804	1.608	1.5939	1.6361	1.6042	1.606	1.6329	1.6528	1.6311	1.6046	1.6559	1.6215	1.6483	1.5143	1.5362	1.6184	1.5226	1.6741	1.6971	1.6086	1.591	1.6055	1.6067	1.53	1.6083	1.5714	1.5917	1.4339	1.6072	1.5051	1.6022	1.3908	1.4435	1.6483	1.6253	1.5975	1.6077	1.6133	1.6913	1.5512		320	0.2242	1.6188	1.6708	1.6192
	325	0.1857	1.7039	1.681	1.7085	1.6948	1.7342	1.7072	1.7069	1.7367	1.7618	1.7358	1.706	1.7569	1.7221	1.751	1.6077	1.6322	1.7199	1.6147	1.7821	1.803	1.7104	1.6882	1.7011	1.7112	1.6269	1.7138	1.6749	1.6937	1.5194	1.712	1.5999	1.7047	1.4713	1.5258	1.751	1.7284	1.6974	1.7069	1.7114	1.7962	1.6431		325	0.206	1.7224	1.7838	1.721
	330	0.1721	1.8107	1.7851	1.8141	1.8015	1.8408	1.8125	1.8122	1.8451	1.8727	1.8426	1.8109	1.8665	1.8283	1.8602	1.7057	1.7333	1.8271	1.7116	1.8939	1.9163	1.816	1.791	1.8031	1.8201	1.7277	1.8233	1.7821	1.8022	1.6113	1.8209	1.6981	1.8101	1.5557	1.6129	1.8602	1.8337	1.8027	1.8112	1.8144	1.9043	1.7398		330	0.1941	1.828	1.8937	1.8267
	335	0.1576	1.9397	1.9122	1.9433	1.9314	1.969	1.9424	1.9396	1.9766	2.008	1.976	1.9377	1.9962	1.9569	1.9877	1.8235	1.8528	1.9569	1.8279	2.0294	2.0488	1.9424	1.9139	1.9256	1.9507	1.8523	1.9546	1.9075	1.9297	1.7204	1.9512	1.8164	1.9396	1.6573	1.7186	1.9877	1.9626	1.9283	1.9359	1.9382	2.0364	1.8567		335	0.1793	1.9577	2.0288	1.9542
	340	0.1448	2.044	2.0142	2.0468	2.0386	2.0732	2.0473	2.0451	2.0833	2.1184	2.0828	2.0409	2.1038	2.0595	2.098	1.9186	1.9498	2.0606	1.9231	2.1383	2.1634	2.0454	2.0167	2.0234	2.0584	1.9502	2.062	2.0106	2.0371	1.8112	2.0572	1.9114	2.0448	1.7406	1.8039	2.098	2.0663	2.0309	2.0372	2.0397	2.1459	1.9523		340	0.1669	2.062	2.1385	2.0597
	345	0.1322	2.1368	2.1066	2.1414	2.1307	2.1678	2.1402	2.1359	2.1794	2.2136	2.178	2.1324	2.1993	2.1525	2.1922	2.0033	2.0361	2.1533	2.0082	2.2374	2.2574	2.138	2.1075	2.1154	2.1522	2.039	2.1554	2.1012	2.1315	1.8905	2.1506	1.9963	2.1394	1.8132	1.8792	2.1922	2.1606	2.1212	2.1265	2.1279	2.2408	2.0375		345	0.1538	2.1569	2.2319	2.1496
	350	0.1255	2.1881	2.1572	2.1909	2.1828	2.2169	2.1907	2.1873	2.2287	2.2628	2.232	2.1791	2.2498	2.1988	2.2426	2.0485	2.0827	2.2033	2.0536	2.2919	2.3099	2.1889	2.1567	2.1635	2.2045	2.0867	2.2017	2.1509	2.1819	1.9323	2.197	2.0395	2.1896	1.852	1.9178	2.2426	2.2105	2.1663	2.1752	2.1717	2.2868	2.0827		350	0.1432	2.2045	2.2792	2.1953
	355	0.1154	2.1818	2.1488	2.1802	2.1823	2.2129	2.186	2.1815	2.2274	2.2506	2.2255	2.1742	2.2445	2.1931	2.2405	2.0424	2.0793	2.1964	2.0474	2.2845	2.3116	2.1869	2.1544	2.1516	2.1951	2.0832	2.1983	2.1456	2.1745	1.9256	2.1887	2.0332	2.1839	1.8446	1.9078	2.2405	2.2053	2.1564	2.1683	2.1641	2.2989	2.0752		355	0.1325	2.1906	2.2585	2.1806
	360	0.1057	2.0977	2.066	2.1018	2.0968	2.1217	2.096	2.099	2.138	2.1687	2.1329	2.0766	2.152	2.1078	2.1492	1.9659	1.9952	2.1151	1.969	2.2002	2.2195	2.1032	2.0699	2.0739	2.1128	1.9973	2.1111	2.0571	2.0868	1.8461	2.0987	1.9481	2.1008	1.7708	1.8338	2.1492	2.1176	2.0705	2.0858	2.0797	2.2002	1.9937		360	0.1207	2.1093	2.1746	2.0917
	365	0.0949	1.9608	1.9341	1.9665	1.9625	1.9956	1.9565	1.9612	1.9925	2.0261	1.9938	1.9454	2.0166	1.9676	2.0084	1.8352	1.8622	1.9755	1.8418	2.0583	2.0728	1.9676	1.9356	1.9366	1.9722	1.866	1.9725	1.9176	1.9541	1.725	1.9606	1.8187	1.9637	1.6536	1.7139	2.0084	1.9781	1.9335	1.9485	1.9427	2.0561	1.8639		365	0.1082	1.9795	2.0307	1.9575
	370	0.0786	1.7126	1.6867	1.7212	1.7173	1.7484	1.7058	1.7155	1.7386	1.7663	1.7407	1.6925	1.7605	1.7173	1.757	1.5995	1.6272	1.7229	1.613	1.7944	1.8116	1.7203	1.6929	1.6925	1.721	1.6287	1.7224	1.6739	1.7089	1.5045	1.7099	1.5833	1.7147	1.4461	1.4956	1.757	1.7279	1.6829	1.6969	1.6981	1.7976	1.63		370	0.0901	1.7242	1.7718	1.7093
	375	0.0621	1.4361	1.4204	1.4507	1.452	1.4782	1.4281	1.4381	1.4569	1.4813	1.4617	1.418	1.4733	1.4411	1.4751	1.3423	1.3631	1.4444	1.3513	1.5097	1.5212	1.4464	1.4258	1.4183	1.4439	1.3659	1.4423	1.4018	1.4336	1.2598	1.4339	1.3284	1.44	1.212	1.2549	1.4751	1.4471	1.4077	1.4198	1.4232	1.5084	1.3669		375	0.0727	1.4508	1.485	1.4371
	380	0.0557	1.1728	1.1632	1.191	1.1975	1.2265	1.1678	1.1761	1.1924	1.2132	1.1983	1.1564	1.2083	1.1785	1.208	1.0955	1.1136	1.1798	1.1059	1.2355	1.2426	1.1853	1.1648	1.1648	1.1788	1.1114	1.1792	1.1466	1.1751	1.0282	1.1711	1.0837	1.1797	0.9953	1.0273	1.208	1.1841	1.1518	1.1576	1.1665	1.2345	1.1172		380	0.0599	1.1812	1.2087	1.1732
	385	0.0492	0.9009	0.8934	0.9225	0.9345	0.9635	0.8935	0.9024	0.9134	0.9306	0.9175	0.8877	0.9277	0.9071	0.9276	0.8413	0.8518	0.9069	0.852	0.9483	0.9559	0.9117	0.8968	0.8954	0.9022	0.8499	0.9006	0.8776	0.8984	0.7874	0.8965	0.8291	0.9058	0.7661	0.7914	0.9276	0.9092	0.8816	0.8873	0.8987	0.9508	0.859		385	0.0541	0.9062	0.9293	0.9003
	390	0.0475	0.6708	0.6698	0.6943	0.7096	0.7427	0.6616	0.6706	0.6767	0.6908	0.6825	0.6585	0.6917	0.6758	0.6915	0.6233	0.6342	0.6744	0.6368	0.7053	0.7114	0.6808	0.6701	0.6676	0.6714	0.6294	0.668	0.6507	0.667	0.5858	0.6645	0.6163	0.6744	0.5746	0.5932	0.6915	0.6765	0.6547	0.6618	0.6718	0.7107	0.6406		390	0.0517	0.6746	0.6946	0.672
	395	0.0479	0.4789	0.4806	0.5063	0.5224	0.5595	0.471	0.4778	0.4837	0.4955	0.4873	0.4734	0.495	0.4853	0.4977	0.4464	0.4535	0.4819	0.4582	0.5041	0.5105	0.489	0.4809	0.4831	0.4778	0.4494	0.4808	0.4627	0.4769	0.4199	0.4762	0.4404	0.4843	0.4158	0.4291	0.4977	0.4831	0.472	0.4739	0.4862	0.5121	0.4622		395	0.0507	0.485	0.4987	0.4876
	400	0.0446	0.3261	0.3336	0.355	0.3728	0.4107	0.3195	0.327	0.3272	0.3375	0.3319	0.3238	0.3388	0.3316	0.3401	0.3035	0.3092	0.3297	0.316	0.3436	0.3508	0.3369	0.3331	0.3335	0.3245	0.3053	0.3254	0.3143	0.325	0.2873	0.3242	0.3011	0.3323	0.2898	0.2987	0.3401	0.3321	0.3233	0.3238	0.3381	0.3565	0.3206		400	0.0466	0.3324	0.3402	0.3361
	405	0.0445	0.2176	0.2265	0.2465	0.2599	0.3038	0.2104	0.2165	0.2177	0.2246	0.2211	0.2175	0.2276	0.223	0.23	0.2029	0.2059	0.2187	0.2128	0.2294	0.2338	0.2263	0.2259	0.2269	0.2142	0.2014	0.2154	0.2095	0.2152	0.1932	0.2156	0.203	0.2246	0.1992	0.2062	0.23	0.2222	0.2186	0.218	0.2331	0.2425	0.2181		405	0.0444	0.2246	0.229	0.2311
	410	0.044	0.1549	0.1628	0.1826	0.194	0.2362	0.1482	0.1538	0.1537	0.1584	0.1565	0.1537	0.1627	0.1592	0.1644	0.1434	0.1456	0.1562	0.153	0.1612	0.1669	0.1638	0.1628	0.1646	0.1508	0.1432	0.1511	0.1472	0.1513	0.1378	0.1525	0.145	0.1613	0.1489	0.153	0.1644	0.161	0.1557	0.1562	0.1708	0.1776	0.1589		410	0.0444	0.1616	0.1642	0.1665
	415	0.0424	0.1051	0.1153	0.1325	0.1412	0.1786	0.0988	0.1041	0.1029	0.106	0.1053	0.1051	0.1113	0.1107	0.1155	0.099	0.0998	0.1068	0.1081	0.1097	0.1143	0.1142	0.1144	0.117	0.1008	0.0964	0.102	0.0993	0.1027	0.0947	0.1039	0.0988	0.1107	0.1072	0.111	0.1155	0.1095	0.1079	0.1076	0.1231	0.126	0.1139		415	0.0431	0.1141	0.1161	0.1185
	420	0.0413	0.0769	0.0861	0.1017	0.1092	0.141	0.0734	0.0772	0.0764	0.0804	0.0798	0.0811	0.0856	0.0847	0.0879	0.0746	0.0748	0.0795	0.0833	0.0815	0.086	0.088	0.0883	0.0899	0.0744	0.0717	0.0764	0.0742	0.0756	0.0729	0.0783	0.0763	0.0845	0.0856	0.0887	0.0879	0.0844	0.0847	0.0827	0.0984	0.0993	0.0885		420	0.0432	0.087	0.0878	0.0919
	425	0.0419	0.0651	0.072	0.0866	0.0926	0.1199	0.0619	0.0649	0.0641	0.0675	0.066	0.0687	0.0722	0.0719	0.0754	0.0613	0.063	0.066	0.0702	0.0684	0.0721	0.074	0.0757	0.0773	0.0621	0.0599	0.0632	0.0619	0.0629	0.0621	0.0653	0.0644	0.0721	0.0751	0.0778	0.0754	0.0721	0.0722	0.0705	0.0855	0.0846	0.0761		425	0.0427	0.0737	0.0741	0.0778
	430	0.041	0.0571	0.0641	0.0763	0.0782	0.1006	0.0505	0.0556	0.0541	0.0564	0.0552	0.0578	0.062	0.0609	0.0648	0.0518	0.0529	0.056	0.06	0.0581	0.0606	0.0638	0.0645	0.0677	0.0516	0.0499	0.0531	0.0514	0.0525	0.0518	0.0539	0.0543	0.0613	0.0673	0.069	0.0648	0.0615	0.0594	0.0603	0.0754	0.0722	0.0668		430	0.0417	0.0641	0.0625	0.065
	435	0.0409	0.0511	0.0567	0.0686	0.0679	0.0852	0.0452	0.0501	0.0483	0.0509	0.0498	0.0539	0.0554	0.0554	0.0586	0.0468	0.0482	0.0512	0.0551	0.0533	0.0545	0.0573	0.0585	0.0621	0.0462	0.0456	0.0474	0.0469	0.0483	0.0479	0.0489	0.0494	0.0561	0.0629	0.0642	0.0586	0.0559	0.0547	0.0552	0.0707	0.0663	0.0607		435	0.0428	0.0586	0.0567	0.0604
	440	0.0411	0.0474	0.0518	0.0633	0.061	0.075	0.0442	0.0476	0.0473	0.0501	0.0479	0.0524	0.0529	0.0541	0.0567	0.045	0.0466	0.0486	0.0528	0.0514	0.0526	0.0556	0.0577	0.0612	0.045	0.0444	0.0449	0.0458	0.0455	0.0469	0.0487	0.0485	0.054	0.0601	0.0626	0.0567	0.0544	0.0547	0.0533	0.0667	0.0649	0.0593		440	0.0428	0.0565	0.0546	0.0567
	445	0.04	0.0442	0.0485	0.0586	0.0542	0.0662	0.0424	0.0447	0.0447	0.0474	0.046	0.0503	0.0506	0.0516	0.0541	0.0424	0.0445	0.0462	0.0499	0.0473	0.0498	0.0524	0.0549	0.0572	0.0431	0.0431	0.0429	0.044	0.043	0.0444	0.0468	0.0466	0.0509	0.0582	0.0599	0.0541	0.052	0.0528	0.0511	0.065	0.0628	0.0567		445	0.0426	0.0545	0.0528	0.0537
	450	0.0401	0.0437	0.0469	0.0566	0.0507	0.0608	0.0404	0.0439	0.0421	0.0458	0.0442	0.0488	0.0504	0.0498	0.052	0.0413	0.0431	0.0437	0.0482	0.0454	0.0473	0.0502	0.0527	0.0553	0.042	0.0419	0.0412	0.0416	0.0409	0.0424	0.0449	0.0439	0.0496	0.0564	0.0586	0.052	0.05	0.05	0.0491	0.0637	0.0602	0.0542		450	0.0423	0.0524	0.0506	0.0509
	455	0.0388	0.0415	0.0445	0.0536	0.0475	0.0543	0.0373	0.0418	0.0398	0.0431	0.0403	0.0457	0.0476	0.0472	0.0493	0.0393	0.0411	0.0411	0.0449	0.0419	0.0445	0.0469	0.0494	0.0524	0.0403	0.0395	0.0384	0.0385	0.0393	0.0393	0.0413	0.041	0.046	0.0527	0.0569	0.0493	0.0473	0.0463	0.0449	0.0609	0.0559	0.0512		455	0.0421	0.0513	0.049	0.0482
	460	0.0399	0.0418	0.0431	0.0532	0.045	0.0522	0.0401	0.0421	0.0404	0.0444	0.0408	0.0459	0.0486	0.0477	0.0507	0.0397	0.0414	0.0412	0.0453	0.043	0.0451	0.0479	0.0511	0.0531	0.0411	0.0399	0.0394	0.0393	0.0397	0.0405	0.0423	0.0413	0.0464	0.0544	0.0575	0.0507	0.048	0.0483	0.0466	0.0604	0.0561	0.0518		460	0.0416	0.0509	0.0473	0.0475
	465	0.039	0.0401	0.0414	0.0514	0.0426	0.0485	0.0358	0.0413	0.0377	0.0411	0.0382	0.0438	0.0477	0.0456	0.0491	0.0374	0.0377	0.0377	0.0413	0.0394	0.0419	0.0436	0.046	0.0489	0.0406	0.0382	0.037	0.0358	0.037	0.0374	0.0375	0.0376	0.0435	0.0525	0.0556	0.0491	0.0446	0.0425	0.0429	0.0554	0.051	0.0495		465	0.0419	0.05	0.0464	0.0462
	470	0.0379	0.0387	0.0395	0.0498	0.0399	0.0459	0.0349	0.0383	0.0359	0.0394	0.0356	0.0425	0.0468	0.0436	0.0474	0.0355	0.036	0.0346	0.0386	0.0365	0.0384	0.0409	0.0434	0.0481	0.0384	0.0368	0.0344	0.0333	0.0362	0.0345	0.0356	0.0347	0.042	0.0506	0.0546	0.0474	0.0417	0.0404	0.0398	0.0545	0.0501	0.0464		470	0.0421	0.0502	0.0463	0.0448
	475	0.0384	0.0394	0.0405	0.0501	0.0412	0.0441	0.0355	0.0399	0.0368	0.0402	0.036	0.0435	0.0464	0.0446	0.0486	0.0366	0.0359	0.0361	0.0385	0.0358	0.0376	0.0409	0.0436	0.0484	0.0391	0.0359	0.0351	0.0354	0.0368	0.0349	0.0345	0.0337	0.0415	0.0505	0.054	0.0486	0.0405	0.0406	0.0402	0.0544	0.0497	0.047		475	0.042	0.0499	0.0455	0.0448
	480	0.0381	0.0396	0.04	0.0492	0.0408	0.0429	0.0362	0.0386	0.0355	0.0403	0.0352	0.0425	0.0457	0.0432	0.0473	0.0353	0.0338	0.0346	0.0374	0.0338	0.0376	0.0402	0.0416	0.047	0.0383	0.0367	0.0339	0.0326	0.0364	0.033	0.0313	0.032	0.0385	0.0511	0.0527	0.0473	0.0392	0.0367	0.0394	0.0527	0.048	0.0445		480	0.0422	0.051	0.0431	0.0444
	485	0.0387	0.0389	0.0406	0.0494	0.0402	0.0441	0.0379	0.039	0.0378	0.0421	0.0398	0.0439	0.045	0.0453	0.0476	0.0371	0.0373	0.0381	0.0419	0.039	0.0411	0.0435	0.046	0.0496	0.039	0.0383	0.0374	0.0368	0.0382	0.0379	0.0384	0.0389	0.0432	0.0516	0.0544	0.0476	0.0446	0.0446	0.0443	0.0549	0.053	0.0483		485	0.041	0.0495	0.0444	0.0461
	490	0.04	0.0401	0.0414	0.0509	0.0418	0.0459	0.0396	0.0405	0.0405	0.0432	0.0411	0.0448	0.0471	0.0464	0.0493	0.0378	0.0388	0.0389	0.0428	0.0397	0.0427	0.0451	0.0477	0.0504	0.041	0.0396	0.0398	0.0398	0.0386	0.0399	0.0411	0.0412	0.0456	0.0532	0.0546	0.0493	0.0453	0.0469	0.0455	0.0566	0.0527	0.0498		490	0.0419	0.0502	0.0456	0.0457
	495	0.0389	0.0398	0.0413	0.0511	0.0409	0.0437	0.0382	0.04	0.0382	0.0419	0.0393	0.0438	0.0459	0.0454	0.0487	0.0361	0.0364	0.037	0.0393	0.0363	0.0396	0.0421	0.0443	0.0474	0.0402	0.0387	0.0384	0.0371	0.0371	0.0371	0.037	0.0379	0.0408	0.0512	0.0537	0.0487	0.0419	0.0423	0.0429	0.0526	0.0491	0.0477		495	0.0416	0.0502	0.044	0.046
	500	0.0401	0.0397	0.0418	0.05	0.0407	0.0441	0.0387	0.0411	0.0389	0.0432	0.0403	0.0437	0.0471	0.0446	0.0495	0.0364	0.0379	0.0378	0.0395	0.037	0.0412	0.0425	0.0455	0.0476	0.0413	0.0385	0.0389	0.0387	0.0375	0.0371	0.0368	0.0384	0.0426	0.0522	0.0541	0.0495	0.0425	0.0444	0.0434	0.0533	0.0509	0.0476		500	0.0415	0.0496	0.0432	0.0449
	505	0.039	0.0403	0.0409	0.0504	0.0409	0.0442	0.0388	0.0416	0.0407	0.0432	0.0414	0.0449	0.0471	0.045	0.049	0.0377	0.0374	0.0384	0.04	0.0372	0.0402	0.0428	0.0448	0.0476	0.0415	0.0384	0.0389	0.039	0.0379	0.0385	0.0388	0.0391	0.042	0.0515	0.0547	0.049	0.0421	0.0447	0.0446	0.0545	0.0511	0.0477		505	0.0411	0.0494	0.0439	0.0453
	510	0.0394	0.0394	0.0398	0.0499	0.0404	0.0428	0.0384	0.039	0.0411	0.0437	0.0405	0.0437	0.046	0.0452	0.0485	0.0376	0.0385	0.039	0.0419	0.0383	0.0414	0.0437	0.047	0.0482	0.0408	0.0388	0.0392	0.0395	0.0388	0.039	0.04	0.0403	0.0434	0.0513	0.0537	0.0485	0.0432	0.0457	0.0453	0.0547	0.0514	0.0481		510	0.0412	0.0497	0.0463	0.0449
	515	0.0398	0.0403	0.0413	0.0502	0.0403	0.0433	0.0388	0.0396	0.0412	0.0419	0.0409	0.043	0.0462	0.0459	0.0486	0.0367	0.0373	0.0389	0.041	0.0386	0.0401	0.0444	0.0461	0.0472	0.0415	0.0391	0.0393	0.0394	0.0381	0.0389	0.0384	0.0394	0.0434	0.0521	0.0528	0.0486	0.0418	0.0433	0.0438	0.054	0.0508	0.047		515	0.0413	0.0486	0.0438	0.0453
	520	0.0397	0.0397	0.0417	0.0505	0.0413	0.0436	0.0392	0.0392	0.0398	0.0423	0.0407	0.0433	0.0471	0.0445	0.0493	0.0379	0.0377	0.0387	0.0426	0.0387	0.0426	0.0456	0.0463	0.0474	0.0408	0.0395	0.0394	0.0397	0.0388	0.0404	0.04	0.0405	0.0447	0.0511	0.053	0.0493	0.0428	0.0455	0.0439	0.0542	0.0519	0.0488		520	0.0396	0.0483	0.0437	0.0441
	525	0.0396	0.0403	0.0412	0.0504	0.041	0.0422	0.0376	0.039	0.0397	0.0412	0.04	0.042	0.0466	0.0436	0.0471	0.0361	0.0376	0.0377	0.0406	0.0371	0.0406	0.0432	0.0442	0.0465	0.0399	0.0382	0.0388	0.0389	0.0373	0.0369	0.038	0.0381	0.0415	0.0504	0.0525	0.0471	0.0411	0.0429	0.042	0.0511	0.0501	0.0455		525	0.0411	0.0483	0.043	0.0446
	530	0.0389	0.0394	0.0402	0.0501	0.04	0.0424	0.0392	0.0389	0.0394	0.0415	0.0399	0.0426	0.0458	0.0442	0.0474	0.0371	0.0382	0.0392	0.0415	0.0382	0.0418	0.0445	0.046	0.0476	0.0396	0.0387	0.0392	0.0396	0.0383	0.0394	0.0396	0.0399	0.0428	0.0494	0.052	0.0474	0.043	0.0449	0.0436	0.0535	0.0528	0.0478		530	0.0402	0.0478	0.044	0.0448
	535	0.0404	0.0396	0.041	0.0503	0.0415	0.0445	0.0397	0.0395	0.041	0.0426	0.0411	0.042	0.0464	0.0443	0.0479	0.0372	0.0387	0.0393	0.0418	0.0388	0.0427	0.0441	0.0464	0.0477	0.0411	0.0396	0.0407	0.0397	0.0387	0.0412	0.0396	0.0407	0.0431	0.0509	0.053	0.0479	0.0432	0.0455	0.0436	0.0549	0.0518	0.0483		535	0.0407	0.0486	0.0438	0.0443
	540	0.0396	0.0394	0.0405	0.0498	0.0402	0.0431	0.0387	0.0391	0.0396	0.0409	0.0407	0.0421	0.0453	0.0447	0.047	0.0367	0.0377	0.0388	0.0418	0.0383	0.0414	0.0433	0.0444	0.0465	0.0401	0.039	0.0392	0.0395	0.0383	0.0395	0.0399	0.0392	0.0424	0.0505	0.0521	0.047	0.043	0.0446	0.0434	0.053	0.0511	0.0465		540	0.0401	0.0488	0.0441	0.0443
	545	0.0402	0.0389	0.0406	0.05	0.0423	0.0437	0.0392	0.0395	0.0396	0.0414	0.0397	0.0413	0.0456	0.0443	0.0469	0.0373	0.039	0.0388	0.0418	0.0388	0.0412	0.0432	0.0445	0.0466	0.0411	0.0389	0.039	0.0396	0.0379	0.0396	0.0394	0.0394	0.0429	0.0505	0.0523	0.0469	0.0424	0.0445	0.0437	0.0531	0.0526	0.0471		545	0.0398	0.0481	0.0437	0.0429
	550	0.0391	0.0389	0.042	0.0514	0.0414	0.0433	0.0387	0.0388	0.0393	0.0414	0.0405	0.0414	0.0476	0.0435	0.0474	0.036	0.0357	0.0382	0.0396	0.0366	0.0404	0.0416	0.0425	0.0452	0.0401	0.0375	0.0378	0.0385	0.0369	0.0376	0.0371	0.0378	0.0404	0.0511	0.0529	0.0474	0.0399	0.0414	0.041	0.0507	0.0483	0.0451		550	0.0406	0.049	0.0438	0.0419
	555	0.0397	0.0393	0.0418	0.0503	0.0402	0.0429	0.0382	0.0396	0.0397	0.0398	0.0393	0.0415	0.0457	0.0432	0.047	0.037	0.0372	0.0378	0.0403	0.0381	0.0396	0.042	0.044	0.0454	0.0404	0.0388	0.0375	0.0383	0.0374	0.0377	0.0373	0.0384	0.0413	0.0498	0.0522	0.047	0.0398	0.0424	0.041	0.0511	0.0484	0.0453		555	0.04	0.0489	0.0439	0.0422
	560	0.0376	0.0393	0.0395	0.0491	0.039	0.0419	0.0369	0.038	0.0393	0.039	0.038	0.0396	0.0449	0.0428	0.0459	0.036	0.035	0.0371	0.0393	0.0367	0.039	0.0414	0.0416	0.0441	0.0386	0.0383	0.0378	0.0364	0.0372	0.0375	0.0358	0.0368	0.0399	0.0496	0.0513	0.0459	0.0394	0.0412	0.041	0.0499	0.047	0.0444		560	0.0408	0.0486	0.0433	0.041
	565	0.0381	0.0399	0.0403	0.0486	0.0394	0.0428	0.0376	0.0382	0.0388	0.0407	0.0387	0.0407	0.0434	0.0429	0.0474	0.0361	0.0364	0.0387	0.041	0.0377	0.0409	0.042	0.0442	0.0455	0.0397	0.0386	0.0383	0.0385	0.0378	0.0394	0.0383	0.0379	0.0421	0.049	0.0512	0.0474	0.0408	0.0445	0.0438	0.0521	0.0498	0.0464		565	0.0408	0.0483	0.0438	0.0433
	570	0.0393	0.0384	0.0403	0.0488	0.0402	0.043	0.0379	0.0385	0.0388	0.0412	0.0398	0.0418	0.0444	0.0437	0.0469	0.0367	0.0365	0.0379	0.0406	0.0379	0.0411	0.0422	0.0438	0.0456	0.0401	0.0385	0.0385	0.0378	0.0378	0.0393	0.0384	0.0384	0.0418	0.0483	0.0509	0.0469	0.0416	0.043	0.0436	0.0513	0.0497	0.0462		570	0.0408	0.0481	0.0437	0.0436
	575	0.0389	0.0397	0.0409	0.0487	0.0402	0.0429	0.0384	0.039	0.0396	0.0399	0.0397	0.0406	0.0442	0.0431	0.0455	0.0373	0.0376	0.0381	0.041	0.0375	0.04	0.0424	0.0432	0.0443	0.0396	0.038	0.0384	0.0375	0.0377	0.0392	0.0379	0.0378	0.042	0.0486	0.0507	0.0455	0.0416	0.043	0.0434	0.0518	0.0492	0.0462		575	0.0399	0.048	0.0434	0.0437
	580	0.0392	0.0396	0.0411	0.0511	0.0406	0.0428	0.0375	0.039	0.0393	0.0405	0.04	0.0405	0.045	0.0426	0.0468	0.037	0.0372	0.0389	0.0402	0.0384	0.0407	0.0412	0.0435	0.0443	0.0401	0.0386	0.0389	0.0376	0.0381	0.0387	0.038	0.0369	0.041	0.0493	0.0512	0.0468	0.0404	0.043	0.0429	0.051	0.049	0.0443		580	0.041	0.049	0.043	0.0424
	585	0.0399	0.0409	0.042	0.0512	0.0409	0.0443	0.0394	0.0402	0.0403	0.0412	0.0407	0.0421	0.0439	0.0446	0.046	0.0365	0.0373	0.0381	0.0406	0.0389	0.041	0.0427	0.0417	0.0443	0.0389	0.0398	0.0396	0.0383	0.0385	0.0362	0.0378	0.0369	0.0394	0.0495	0.0518	0.046	0.0398	0.0407	0.0419	0.0492	0.0479	0.0437		585	0.0399	0.0468	0.0424	0.0405
	590	0.0409	0.0414	0.0423	0.0499	0.0414	0.0445	0.0401	0.0404	0.0399	0.0426	0.0408	0.042	0.0442	0.0453	0.0462	0.0389	0.0384	0.0398	0.0432	0.0403	0.0422	0.0431	0.0421	0.046	0.0402	0.0398	0.0401	0.0389	0.0406	0.038	0.0386	0.0391	0.0398	0.0498	0.0523	0.0462	0.0409	0.0413	0.0439	0.0503	0.0505	0.0454		590	0.0395	0.0474	0.0422	0.0408
	595	0.0396	0.0399	0.0411	0.0484	0.0393	0.0437	0.0403	0.0399	0.0383	0.0411	0.0407	0.0411	0.0422	0.0441	0.0457	0.0373	0.0378	0.0397	0.0424	0.0388	0.0423	0.0428	0.0428	0.0459	0.0386	0.0397	0.0393	0.0375	0.0401	0.0378	0.0394	0.0399	0.0417	0.0483	0.0508	0.0457	0.0426	0.0419	0.0437	0.0507	0.0518	0.045		595	0.0406	0.0464	0.0427	0.0438
	600	0.0389	0.04	0.0404	0.0497	0.0407	0.0424	0.0398	0.0404	0.0392	0.0408	0.0391	0.0412	0.0432	0.0448	0.0454	0.0382	0.0359	0.0386	0.0415	0.038	0.0412	0.042	0.0411	0.0447	0.039	0.0386	0.0383	0.0366	0.0383	0.0368	0.0369	0.038	0.0395	0.0493	0.0517	0.0454	0.0403	0.0393	0.0411	0.0482	0.0494	0.0442		600	0.0398	0.0463	0.041	0.0402
	605	0.0398	0.0388	0.0399	0.0493	0.0395	0.0438	0.0396	0.0404	0.039	0.0409	0.0389	0.0419	0.043	0.0446	0.0457	0.0382	0.0369	0.0387	0.0415	0.0378	0.0418	0.0404	0.0415	0.0436	0.0391	0.0381	0.0382	0.0369	0.0389	0.0371	0.0365	0.0377	0.0397	0.049	0.0504	0.0457	0.041	0.0405	0.0408	0.0488	0.0489	0.0424		605	0.0397	0.0455	0.0412	0.04
	610	0.0392	0.0393	0.0396	0.0495	0.0388	0.0426	0.039	0.0402	0.0383	0.0398	0.0391	0.0403	0.0424	0.0441	0.0449	0.0384	0.0373	0.0394	0.0419	0.0387	0.0411	0.0416	0.0409	0.0444	0.0391	0.0385	0.0388	0.0379	0.0386	0.0379	0.038	0.0387	0.0405	0.0483	0.0497	0.0449	0.0414	0.0414	0.0426	0.0497	0.0496	0.044		610	0.0404	0.0456	0.042	0.04
	615	0.0395	0.0392	0.0401	0.0496	0.0399	0.0426	0.0398	0.0399	0.0387	0.0405	0.0404	0.0417	0.0432	0.0444	0.0449	0.0384	0.037	0.039	0.0415	0.0384	0.0416	0.0413	0.0416	0.044	0.0403	0.0389	0.0392	0.0387	0.0391	0.0378	0.0393	0.0388	0.039	0.0491	0.0508	0.0449	0.0418	0.0411	0.0428	0.0504	0.0506	0.0439		615	0.0406	0.0456	0.0412	0.0398
	620	0.0395	0.039	0.0401	0.0479	0.0401	0.042	0.0398	0.0389	0.0384	0.0405	0.0386	0.0414	0.0438	0.044	0.0445	0.0384	0.0372	0.038	0.0405	0.0386	0.0414	0.0415	0.0421	0.0437	0.0383	0.0392	0.0382	0.0378	0.0386	0.0379	0.0381	0.0389	0.0396	0.0488	0.0495	0.0445	0.0411	0.0405	0.0427	0.0492	0.0497	0.0421		620	0.0389	0.0457	0.0405	0.0376
	625	0.0385	0.0382	0.0385	0.0467	0.039	0.0421	0.0392	0.0391	0.0377	0.04	0.038	0.0402	0.0427	0.043	0.0443	0.0379	0.0376	0.0384	0.0403	0.0382	0.0409	0.0409	0.0419	0.0438	0.0391	0.0381	0.0379	0.0373	0.038	0.0379	0.0385	0.0395	0.0386	0.0474	0.0497	0.0443	0.0411	0.0407	0.043	0.0491	0.0496	0.0418		625	0.0394	0.0444	0.0401	0.0396
	630	0.0385	0.0377	0.0381	0.0477	0.0387	0.0411	0.0386	0.0393	0.0373	0.0386	0.0381	0.0399	0.042	0.0432	0.0435	0.0373	0.0371	0.0373	0.0406	0.038	0.0403	0.0406	0.0406	0.044	0.0375	0.0368	0.0368	0.0369	0.0377	0.0361	0.0377	0.0394	0.0396	0.0467	0.0489	0.0435	0.0407	0.0408	0.0425	0.0493	0.0494	0.0427		630	0.0397	0.0445	0.04	0.0393
	635	0.0377	0.0384	0.0385	0.0466	0.0394	0.0406	0.037	0.0388	0.0373	0.0391	0.0373	0.0397	0.0412	0.0431	0.0439	0.0374	0.0361	0.0373	0.0397	0.0377	0.0408	0.0404	0.0413	0.0433	0.0381	0.0378	0.0375	0.0374	0.0372	0.0362	0.038	0.0377	0.0386	0.0477	0.0487	0.0439	0.0405	0.0403	0.0433	0.0488	0.0489	0.0427		635	0.0382	0.0431	0.0395	0.038
	640	0.0393	0.0381	0.0395	0.0472	0.0402	0.0419	0.039	0.0393	0.0386	0.0403	0.039	0.0409	0.0426	0.0438	0.0444	0.0381	0.0372	0.0367	0.0401	0.0387	0.0414	0.0412	0.0404	0.0438	0.0392	0.0375	0.0377	0.0376	0.0379	0.0363	0.0388	0.0394	0.0387	0.0482	0.0499	0.0444	0.0414	0.0404	0.0429	0.0477	0.0494	0.0428		640	0.0398	0.0435	0.0398	0.0371
	645	0.0383	0.0375	0.0387	0.0461	0.0373	0.0404	0.0384	0.0387	0.0369	0.0384	0.0372	0.0397	0.0414	0.0429	0.0443	0.0374	0.0367	0.0357	0.0392	0.0373	0.0406	0.0402	0.0402	0.0426	0.0378	0.0366	0.0379	0.0359	0.0372	0.0365	0.0376	0.0371	0.0381	0.0466	0.0488	0.0443	0.0408	0.0393	0.0431	0.0486	0.0476	0.0415		645	0.0391	0.0434	0.039	0.0384
	650	0.0381	0.0373	0.0373	0.0461	0.0373	0.0408	0.038	0.0393	0.0364	0.0385	0.0372	0.0393	0.0421	0.042	0.0425	0.0368	0.0371	0.0375	0.0394	0.0379	0.0401	0.0408	0.0394	0.0434	0.0373	0.0378	0.0371	0.037	0.0378	0.0362	0.0369	0.0381	0.0383	0.0467	0.0475	0.0425	0.0402	0.0402	0.0433	0.0482	0.0487	0.0421		650	0.0388	0.0438	0.0388	0.0381
	655	0.0374	0.0373	0.0363	0.045	0.0376	0.0404	0.0377	0.0384	0.0363	0.0382	0.0363	0.0385	0.0399	0.0426	0.0438	0.0371	0.0362	0.0377	0.0392	0.0382	0.0406	0.0413	0.0398	0.0422	0.0375	0.0367	0.0369	0.0354	0.0361	0.0356	0.0366	0.0363	0.0373	0.0467	0.047	0.0438	0.04	0.0393	0.0424	0.0476	0.048	0.0403		655	0.0378	0.0417	0.0387	0.0355
	660	0.0377	0.0368	0.0367	0.0448	0.0372	0.0397	0.0382	0.0389	0.0367	0.0391	0.037	0.0383	0.0403	0.0426	0.0424	0.0381	0.0368	0.038	0.0403	0.0381	0.0407	0.0401	0.0409	0.0434	0.0379	0.0372	0.0367	0.0368	0.0373	0.0362	0.0387	0.038	0.0391	0.0461	0.0466	0.0424	0.0421	0.0401	0.0443	0.0494	0.0498	0.0417		660	0.038	0.0421	0.0395	0.0389
	665	0.0383	0.0383	0.0381	0.0473	0.039	0.0408	0.0395	0.0401	0.0382	0.0393	0.038	0.0406	0.042	0.0441	0.045	0.0379	0.0374	0.0372	0.0387	0.0388	0.0413	0.0421	0.0424	0.0445	0.0389	0.0382	0.0377	0.037	0.0378	0.0369	0.0379	0.0386	0.0387	0.0485	0.0487	0.045	0.0414	0.0394	0.0448	0.0502	0.0502	0.0421		665	0.0398	0.043	0.0395	0.0368
	670	0.0369	0.0376	0.0369	0.0443	0.0362	0.0393	0.0386	0.0391	0.0367	0.0384	0.0374	0.0392	0.0408	0.0426	0.0433	0.0372	0.0368	0.0377	0.0399	0.0384	0.0407	0.0405	0.0411	0.0424	0.0372	0.0374	0.0376	0.0365	0.0374	0.0369	0.0374	0.038	0.0397	0.0468	0.0477	0.0433	0.0408	0.0402	0.0452	0.0481	0.0486	0.0417		670	0.0383	0.0416	0.0376	0.0368
	675	0.0386	0.0372	0.0372	0.0456	0.0378	0.0407	0.0398	0.0396	0.0376	0.0399	0.0381	0.04	0.0417	0.0431	0.0431	0.0391	0.0377	0.0378	0.0393	0.0387	0.0414	0.0413	0.0413	0.0437	0.0386	0.0393	0.037	0.0371	0.0382	0.0369	0.0379	0.0386	0.039	0.048	0.0479	0.0431	0.0424	0.0414	0.0459	0.0497	0.0487	0.0412		675	0.0378	0.0415	0.0389	0.0364
	680	0.0383	0.0369	0.0363	0.0455	0.0383	0.0407	0.0391	0.0392	0.0376	0.0394	0.0385	0.0409	0.0412	0.0433	0.0424	0.0383	0.0378	0.0385	0.0398	0.039	0.0402	0.0413	0.0429	0.0443	0.038	0.0393	0.0379	0.0377	0.0392	0.0376	0.0386	0.0399	0.0403	0.0462	0.0471	0.0424	0.0423	0.042	0.0455	0.0504	0.0507	0.0432		680	0.0372	0.0415	0.0389	0.0379
	685	0.0379	0.0376	0.0361	0.0458	0.0373	0.0406	0.0403	0.0395	0.0383	0.0395	0.0392	0.0396	0.0409	0.0436	0.0426	0.0392	0.0376	0.0386	0.0408	0.039	0.0415	0.0412	0.0426	0.0444	0.0382	0.0378	0.0379	0.0371	0.0385	0.0386	0.0392	0.0384	0.0403	0.0465	0.0472	0.0426	0.043	0.0411	0.046	0.0498	0.0498	0.0427		685	0.0381	0.0434	0.0394	0.0392
	690	0.0376	0.0373	0.0365	0.0435	0.0377	0.0406	0.0391	0.0387	0.0377	0.039	0.0384	0.0405	0.0403	0.042	0.0433	0.0384	0.038	0.0375	0.0401	0.0392	0.0411	0.0404	0.0431	0.0431	0.0382	0.0376	0.0378	0.0367	0.0386	0.0377	0.0386	0.0394	0.0396	0.0475	0.0473	0.0433	0.042	0.0419	0.0441	0.0497	0.0506	0.0417		690	0.0391	0.0407	0.0386	0.0387
	695	0.0373	0.036	0.0354	0.0436	0.0358	0.0385	0.0385	0.0396	0.0371	0.0392	0.0385	0.0397	0.0405	0.0417	0.0422	0.0386	0.0378	0.0377	0.0384	0.038	0.0402	0.0399	0.0398	0.0414	0.038	0.0385	0.0369	0.0366	0.0374	0.0367	0.0375	0.0373	0.038	0.0475	0.0469	0.0422	0.0411	0.0403	0.0421	0.0479	0.0482	0.0408		695	0.0372	0.041	0.0381	0.0375
	700	0.0371	0.0361	0.036	0.0435	0.0365	0.0405	0.0386	0.0385	0.0378	0.0392	0.0382	0.0405	0.0393	0.0415	0.0418	0.038	0.0374	0.0378	0.0397	0.0382	0.0404	0.041	0.0421	0.0424	0.0381	0.0378	0.0369	0.0372	0.0383	0.0375	0.039	0.0394	0.0395	0.0459	0.0465	0.0418	0.0418	0.0408	0.0449	0.049	0.0496	0.043		700	0.0379	0.0423	0.04	0.0397
	705	0.0374	0.0376	0.0359	0.0441	0.0371	0.0402	0.0384	0.0397	0.0387	0.0406	0.0378	0.0413	0.0412	0.0431	0.0434	0.039	0.0381	0.0387	0.0396	0.0395	0.0411	0.0409	0.0418	0.0428	0.0384	0.0395	0.0378	0.0383	0.0389	0.0372	0.0386	0.0399	0.0389	0.0458	0.0477	0.0434	0.042	0.0413	0.0455	0.049	0.0498	0.0428		705	0.0386	0.0438	0.04	0.04
	710	0.0373	0.0374	0.0355	0.0442	0.0371	0.0392	0.0406	0.0397	0.0388	0.0403	0.0397	0.0413	0.0418	0.0431	0.045	0.0393	0.0382	0.0396	0.0397	0.0404	0.0416	0.0407	0.0406	0.0438	0.0391	0.0392	0.039	0.0376	0.0395	0.0384	0.0391	0.0395	0.0386	0.0467	0.0477	0.045	0.0425	0.0415	0.0431	0.0496	0.0487	0.0434		710	0.0382	0.0426	0.0391	0.0384
	715	0.0395	0.0392	0.0359	0.0438	0.037	0.041	0.0401	0.041	0.0405	0.0412	0.04	0.0421	0.0414	0.0441	0.0446	0.0414	0.0389	0.0396	0.0411	0.0395	0.0429	0.0429	0.0425	0.0445	0.0403	0.0401	0.0394	0.0403	0.0402	0.04	0.0394	0.0406	0.0396	0.0489	0.0479	0.0446	0.0437	0.0426	0.0466	0.0496	0.0502	0.0432		715	0.0402	0.0444	0.0398	0.04
	720	0.0399	0.0385	0.0356	0.0443	0.0368	0.0422	0.0401	0.0412	0.0397	0.0411	0.0406	0.0416	0.0408	0.043	0.0444	0.0404	0.0388	0.0402	0.0418	0.04	0.0421	0.043	0.0434	0.0458	0.0401	0.0408	0.0399	0.0399	0.0406	0.0397	0.0418	0.041	0.0415	0.048	0.0476	0.0444	0.0442	0.0441	0.0459	0.0509	0.0509	0.0443		720	0.0389	0.044	0.0408	0.0415
	725	0.0393	0.0389	0.0375	0.0452	0.038	0.0417	0.0413	0.0419	0.0407	0.0415	0.0418	0.0426	0.0422	0.0441	0.0459	0.0405	0.0403	0.0409	0.0418	0.0422	0.0429	0.0429	0.0443	0.0448	0.0411	0.0402	0.0404	0.0404	0.0411	0.0411	0.0425	0.0421	0.0418	0.0488	0.0481	0.0459	0.0451	0.0446	0.0473	0.0518	0.0519	0.0447		725	0.0392	0.0442	0.0416	0.0415
	730	0.0414	0.0409	0.038	0.0458	0.0403	0.0438	0.0423	0.0431	0.0413	0.0436	0.043	0.0444	0.043	0.0465	0.0452	0.0429	0.0409	0.0419	0.043	0.042	0.0454	0.0446	0.0455	0.047	0.0418	0.0415	0.042	0.0428	0.044	0.0421	0.0426	0.0441	0.0445	0.0497	0.0496	0.0452	0.0465	0.0447	0.0485	0.0526	0.0537	0.047		730	0.0402	0.0457	0.0421	0.0423
	735	0.0442	0.044	0.0388	0.0472	0.0434	0.0464	0.045	0.0448	0.0436	0.0448	0.045	0.0458	0.0471	0.0479	0.0485	0.0453	0.0436	0.0444	0.046	0.0445	0.0462	0.0464	0.0478	0.0503	0.044	0.0457	0.0443	0.045	0.0458	0.0443	0.0465	0.0461	0.0463	0.0505	0.0523	0.0485	0.0488	0.0483	0.0515	0.0544	0.0562	0.0487		735	0.0435	0.0477	0.044	0.0452
	740	0.0434	0.0422	0.0386	0.0483	0.0413	0.0451	0.0449	0.0449	0.0437	0.0449	0.0436	0.047	0.0464	0.0478	0.0477	0.0452	0.0432	0.0438	0.0446	0.0445	0.0471	0.0462	0.048	0.0485	0.0444	0.0444	0.0444	0.0455	0.0458	0.0452	0.0451	0.0459	0.0469	0.0514	0.0519	0.0477	0.0484	0.0487	0.0522	0.0544	0.0553	0.0489		740	0.0437	0.0487	0.0446	0.0461
	745	0.0447	0.0436	0.0409	0.0486	0.0424	0.0467	0.0459	0.0456	0.0453	0.0457	0.0453	0.0468	0.0466	0.0492	0.0482	0.0456	0.0441	0.0456	0.046	0.046	0.0484	0.048	0.0489	0.0498	0.0456	0.0436	0.0458	0.0462	0.0471	0.0463	0.0459	0.0474	0.0473	0.0524	0.0523	0.0482	0.0495	0.048	0.0515	0.0556	0.0562	0.0498		745	0.0445	0.0484	0.0464	0.0464
	750	0.0455	0.0435	0.0402	0.0478	0.0431	0.0469	0.0461	0.0453	0.0449	0.0459	0.045	0.0462	0.0452	0.0491	0.0487	0.0455	0.0437	0.0456	0.0466	0.0451	0.0479	0.0481	0.0493	0.0511	0.0455	0.0445	0.0454	0.0457	0.0467	0.0463	0.0472	0.0476	0.0477	0.0512	0.0513	0.0487	0.0504	0.0485	0.0516	0.0561	0.0573	0.0497		750	0.0441	0.0498	0.046	0.0464
	755	0.0452	0.0439	0.0399	0.0482	0.0436	0.0474	0.0467	0.0465	0.0455	0.0464	0.0462	0.047	0.0469	0.0494	0.0491	0.0469	0.0461	0.0468	0.0468	0.0465	0.0489	0.0484	0.0488	0.0514	0.0471	0.0458	0.0462	0.0464	0.0479	0.047	0.0469	0.047	0.049	0.0513	0.052	0.0491	0.0499	0.0484	0.0534	0.0563	0.058	0.0507		755	0.0446	0.0488	0.0449	0.0451
	760	0.0463	0.0434	0.0398	0.049	0.0422	0.0478	0.0458	0.0469	0.0465	0.0463	0.0464	0.0448	0.0477	0.0498	0.0486	0.0467	0.0439	0.0461	0.0473	0.0461	0.0486	0.0478	0.0475	0.0509	0.0463	0.0455	0.0462	0.0469	0.0476	0.0469	0.0472	0.0479	0.0484	0.0509	0.0512	0.0486	0.0502	0.0489	0.0536	0.0554	0.0564	0.0504		760	0.045	0.0481	0.0446	0.0443
	765	0.0463	0.045	0.04	0.0478	0.0423	0.0475	0.0466	0.0457	0.0453	0.0457	0.0461	0.0466	0.0461	0.0488	0.0486	0.0468	0.0454	0.0448	0.0468	0.0455	0.0487	0.0477	0.048	0.0511	0.0453	0.0464	0.0457	0.0463	0.0476	0.0475	0.0478	0.0486	0.0487	0.052	0.0509	0.0486	0.0508	0.0487	0.0542	0.0552	0.0568	0.0504		765	0.0442	0.0477	0.0447	0.0457
	770	0.0454	0.0435	0.0404	0.0468	0.042	0.047	0.0464	0.0458	0.0447	0.0457	0.0457	0.0469	0.0449	0.0479	0.0486	0.046	0.0448	0.0447	0.0462	0.0469	0.0489	0.048	0.0473	0.0507	0.0454	0.0455	0.0463	0.0462	0.0472	0.0454	0.0471	0.0472	0.0477	0.0508	0.0511	0.0486	0.0493	0.0481	0.0539	0.0562	0.0552	0.0488		770	0.0451	0.0483	0.0471	0.0457
	775	0.0461	0.0444	0.0384	0.0462	0.0421	0.0467	0.0474	0.0463	0.0444	0.0447	0.0451	0.0461	0.046	0.0477	0.0482	0.0466	0.0447	0.0463	0.0464	0.0455	0.0482	0.047	0.0487	0.0509	0.0446	0.0453	0.0464	0.0477	0.048	0.0458	0.0459	0.0489	0.0473	0.0507	0.0507	0.0482	0.0496	0.0488	0.0525	0.0556	0.0553	0.0499		775	0.0445	0.0482	0.0455	0.0454
	780	0.0446	0.0428	0.0378	0.0452	0.0414	0.0455	0.0444	0.0443	0.0452	0.0438	0.0436	0.0438	0.0445	0.0473	0.0469	0.0458	0.0448	0.0449	0.0457	0.0441	0.0466	0.0454	0.0468	0.0491	0.0435	0.0434	0.0443	0.0445	0.0464	0.0464	0.0462	0.0466	0.0467	0.049	0.0501	0.0469	0.0484	0.0465	0.0519	0.0532	0.0543	0.0479		780	0.0453	0.0491	0.0462	0.0465
	785	0.0449	0.0414	0.0374	0.0456	0.0408	0.045	0.0448	0.0449	0.0445	0.0448	0.043	0.045	0.0451	0.0479	0.0477	0.0461	0.0446	0.0452	0.0446	0.0451	0.0471	0.0468	0.0466	0.0489	0.0442	0.0437	0.0452	0.0449	0.0472	0.0457	0.0459	0.0465	0.0472	0.05	0.0499	0.0477	0.0497	0.0466	0.0528	0.0523	0.0545	0.0479		785	0.0439	0.0475	0.0448	0.0455
	790	0.0438	0.0417	0.0376	0.0446	0.0398	0.0446	0.0443	0.0446	0.0428	0.0441	0.0433	0.0441	0.0441	0.0462	0.0463	0.0451	0.0435	0.045	0.0454	0.0431	0.0483	0.0455	0.0477	0.0491	0.0438	0.0437	0.045	0.0439	0.0451	0.044	0.0467	0.0471	0.0473	0.0488	0.0492	0.0463	0.0478	0.0462	0.0516	0.0539	0.0535	0.0475		790	0.0444	0.0479	0.0452	0.0452
	795	0.0438	0.042	0.0374	0.0455	0.0404	0.0454	0.0449	0.0448	0.0443	0.0437	0.044	0.0445	0.044	0.047	0.0466	0.0454	0.0441	0.0451	0.0459	0.0451	0.0469	0.0465	0.0475	0.0496	0.0451	0.0445	0.0444	0.0458	0.0462	0.0451	0.0455	0.0464	0.048	0.0493	0.0499	0.0466	0.0477	0.0475	0.0517	0.053	0.0542	0.0484		795	0.0437	0.0478	0.0444	0.0456
	800	0.0441	0.0415	0.0349	0.0439	0.0393	0.0446	0.0437	0.0435	0.0427	0.0429	0.0434	0.0446	0.0438	0.0462	0.0455	0.0447	0.043	0.045	0.0455	0.0444	0.0461	0.046	0.0464	0.0484	0.0428	0.0451	0.043	0.0441	0.046	0.0445	0.0445	0.0463	0.046	0.0486	0.0489	0.0455	0.0474	0.0453	0.0517	0.0514	0.0532	0.0476		800	0.0429	0.0469	0.0434	0.044
[truncated: 63 more columns]

## Sheet: Figure 5
								Chelation Curve 1								Chelation Curve 2								Chelation Curve 3
	Blank = 295 μL Water + 5 μL DMSO		Aluminum (μM) Calibration Curve					Volume of 819 μM Aluminum Added to 0.001% (w/v) Alginate								Volume of 819 μM Aluminum Added to 0.001% (w/v) Alginate								Volume of 819 μM Aluminum Added to 0.001% (w/v) Alginate
	Wavelength (nm)	Blank	0	1	2	4	8	Blank	0 μL	10 μL	20 μL	40 μL	80 μL	160 μL	320 μL (1/4 Dilution)	Blank	0 μL	10 μL	20 μL	40 μL	80 μL	160 μL	320 μL (1/4 Dilution)	Blank	0 μL	10 μL	20 μL	40 μL	80 μL	160 μL	320 μL (1/4 Dilution)
	300	0.4437	1.5131	1.526	1.5106	1.4813	1.5447	0.4437	1.4262	1.4699	1.477	1.4131	1.3969	1.4699	1.5686	0.4668	1.4609	1.4844	1.493	1.4233	1.449	1.5139	1.6063	0.4776	1.4643	1.4866	1.4576	1.322	1.4366	1.5122	1.5659
	305	0.3179	1.4212	1.4317	1.4218	1.3842	1.4451	0.3179	1.3529	1.3893	1.389	1.3271	1.3076	1.3751	1.4691	0.3364	1.3729	1.3991	1.4087	1.3388	1.3548	1.4209	1.497	0.3471	1.3835	1.3911	1.3637	1.2305	1.3477	1.4221	1.4587
	310	0.263	1.4151	1.4238	1.4168	1.3722	1.4285	0.263	1.3524	1.3853	1.3817	1.3181	1.2975	1.3616	1.4529	0.2814	1.3688	1.394	1.4022	1.329	1.3447	1.4078	1.4748	0.2896	1.3806	1.3818	1.3539	1.2171	1.3386	1.409	1.4385
	315	0.2414	1.4451	1.4511	1.4436	1.396	1.4515	0.2414	1.3828	1.4134	1.4079	1.3446	1.3212	1.3833	1.476	0.2556	1.3973	1.4227	1.4295	1.3534	1.3689	1.431	1.495	0.2652	1.4104	1.4065	1.3799	1.2381	1.3635	1.4317	1.4576
	320	0.219	1.5066	1.5137	1.5057	1.4531	1.5081	0.219	1.4436	1.4724	1.4655	1.4015	1.3751	1.4402	1.5347	0.2315	1.4576	1.4809	1.4877	1.4073	1.4262	1.4892	1.5494	0.2404	1.4711	1.4616	1.4343	1.2866	1.4213	1.492	1.5118
	325	0.1976	1.5974	1.6056	1.5953	1.5391	1.594	0.1976	1.5322	1.5582	1.5501	1.4865	1.4563	1.5287	1.6258	0.2108	1.5447	1.5678	1.573	1.4903	1.5125	1.5814	1.637	0.2194	1.5598	1.5443	1.5162	1.3593	1.5072	1.58	1.5968
	330	0.1837	1.6933	1.703	1.693	1.6298	1.6878	0.1837	1.6217	1.6474	1.6378	1.5744	1.5409	1.6238	1.7242	0.1965	1.6344	1.6583	1.663	1.576	1.6024	1.6799	1.732	0.203	1.6517	1.6299	1.6021	1.4379	1.5958	1.6758	1.6902
	335	0.1674	1.8106	1.8188	1.8096	1.7399	1.8011	0.1674	1.7344	1.757	1.7468	1.6823	1.6452	1.7386	1.8437	0.1781	1.7455	1.7664	1.7714	1.6821	1.712	1.7996	1.8493	0.1848	1.7655	1.7383	1.7078	1.5312	1.7063	1.7936	1.805
	340	0.1546	1.9074	1.9148	1.9087	1.8321	1.8963	0.1546	1.8261	1.8473	1.8345	1.7726	1.7296	1.8331	1.942	0.1636	1.8372	1.8578	1.8628	1.7681	1.8036	1.8975	1.9466	0.1702	1.857	1.8278	1.7951	1.6084	1.7957	1.8895	1.8978
	345	0.1409	1.9951	2.0017	1.9968	1.9143	1.983	0.1409	1.9098	1.9289	1.9176	1.8522	1.8054	1.9194	2.0306	0.1501	1.9198	1.9416	1.9427	1.8427	1.8836	1.9868	2.0328	0.1562	1.9422	1.9089	1.8741	1.6788	1.8782	1.9764	1.9824
	350	0.1324	2.0493	2.0528	2.0486	1.9633	2.0359	0.1324	1.9607	1.977	1.9657	1.8969	1.8514	1.9675	2.0802	0.1414	1.9686	1.9889	1.9892	1.8849	1.9291	2.0354	2.0829	0.1459	1.9914	1.9578	1.9214	1.7188	1.9253	2.0256	2.0299
	355	0.1244	2.044	2.0495	2.0435	1.9669	2.0346	0.1244	1.9603	1.9706	1.9654	1.8953	1.8507	1.9705	2.0705	0.1316	1.9677	1.9921	1.9854	1.8813	1.9246	2.032	2.0751	0.1354	1.9842	1.957	1.9224	1.7179	1.9233	2.0232	2.0229
	360	0.1141	1.9796	1.983	1.9806	1.9033	1.973	0.1141	1.8997	1.9115	1.8934	1.8368	1.7877	1.9055	2.0118	0.1205	1.9018	1.926	1.9189	1.8145	1.8597	1.9702	2.0151	0.1243	1.9209	1.8896	1.8568	1.6594	1.8554	1.9557	1.9614
	365	0.1051	1.8646	1.862	1.863	1.7938	1.8653	0.1051	1.7886	1.8012	1.7885	1.7235	1.6829	1.7962	1.9007	0.109	1.7883	1.8104	1.8069	1.7048	1.7502	1.8568	1.9042	0.1119	1.8088	1.7835	1.7449	1.56	1.743	1.8409	1.8472
	370	0.0898	1.6559	1.6392	1.6511	1.5965	1.6675	0.0898	1.5808	1.5956	1.5809	1.527	1.4868	1.597	1.7008	0.0905	1.5832	1.6094	1.6005	1.5011	1.5496	1.657	1.7015	0.0934	1.5998	1.5776	1.5405	1.3793	1.5365	1.6329	1.6408
	375	0.0752	1.4018	1.3864	1.4027	1.3595	1.4282	0.0752	1.3425	1.3571	1.3439	1.2954	1.2561	1.3635	1.4571	0.0716	1.341	1.3693	1.3599	1.2721	1.3099	1.4194	1.4602	0.0768	1.3533	1.3368	1.3061	1.1713	1.2959	1.3986	1.3985
	380	0.0658	1.1445	1.1337	1.1505	1.1226	1.1888	0.0658	1.1059	1.1155	1.1086	1.0617	1.0324	1.1321	1.218	0.0605	1.1058	1.1333	1.1261	1.0472	1.0733	1.1844	1.219	0.0668	1.1109	1.1026	1.0743	0.9694	1.0647	1.1631	1.1651
	385	0.0606	0.8892	0.8781	0.8966	0.8813	0.949	0.0606	0.8618	0.8734	0.8648	0.8255	0.8043	0.9004	0.9776	0.0541	0.8621	0.8939	0.8811	0.8161	0.8374	0.9497	0.9802	0.0601	0.864	0.8597	0.842	0.7653	0.8277	0.9305	0.9376
	390	0.057	0.6644	0.6592	0.6779	0.6777	0.7421	0.057	0.6504	0.6607	0.6555	0.6231	0.6088	0.697	0.7713	0.0506	0.651	0.6807	0.6722	0.6222	0.6318	0.743	0.7764	0.0575	0.6507	0.653	0.642	0.5861	0.6311	0.726	0.7358
	395	0.0561	0.4767	0.4759	0.4951	0.5006	0.5665	0.0561	0.475	0.4791	0.4799	0.4518	0.4441	0.5251	0.5886	0.0504	0.4746	0.5009	0.4969	0.4581	0.4591	0.566	0.5994	0.0572	0.4722	0.4776	0.4724	0.4366	0.4629	0.5532	0.5662
	400	0.051	0.3311	0.3327	0.351	0.3636	0.4266	0.051	0.3317	0.3383	0.3426	0.3178	0.3166	0.3895	0.4467	0.0478	0.333	0.3585	0.3566	0.3273	0.3235	0.4246	0.4584	0.0545	0.3302	0.3388	0.3371	0.3171	0.3304	0.4142	0.4286
	405	0.0494	0.2201	0.2277	0.2441	0.2606	0.3181	0.0494	0.2269	0.236	0.239	0.2207	0.2205	0.287	0.339	0.0456	0.2314	0.2524	0.2551	0.2349	0.2252	0.32	0.3472	0.0535	0.2281	0.2357	0.2372	0.2305	0.2356	0.3089	0.3246
	410	0.0496	0.1595	0.1667	0.1817	0.2005	0.2533	0.0496	0.1644	0.1727	0.1782	0.1633	0.164	0.2242	0.2722	0.0445	0.1717	0.1896	0.1951	0.1782	0.1657	0.2532	0.2801	0.0524	0.1671	0.1751	0.1778	0.1797	0.1788	0.2447	0.2598
	415	0.0471	0.1107	0.1169	0.1326	0.1511	0.1972	0.0471	0.118	0.1258	0.1317	0.1181	0.1202	0.1745	0.2164	0.0441	0.1256	0.14	0.1465	0.1355	0.1219	0.2006	0.2259	0.0506	0.1212	0.1273	0.132	0.1368	0.1329	0.1917	0.2052
	420	0.0463	0.0806	0.0877	0.102	0.119	0.1581	0.0463	0.0884	0.0957	0.102	0.0911	0.0928	0.136	0.1748	0.0425	0.0952	0.1085	0.1163	0.1082	0.0939	0.1606	0.183	0.0508	0.0925	0.0967	0.1028	0.1097	0.1052	0.1531	0.1658
	425	0.0476	0.0683	0.0765	0.0888	0.1041	0.1382	0.0476	0.075	0.0822	0.0876	0.0786	0.0804	0.1153	0.1497	0.0432	0.0821	0.0938	0.1015	0.0961	0.0803	0.1369	0.1589	0.0517	0.0792	0.0827	0.0891	0.0967	0.0924	0.1328	0.1417
	430	0.0453	0.059	0.0651	0.0763	0.0896	0.1175	0.0453	0.0641	0.0697	0.0755	0.0671	0.0704	0.1002	0.1304	0.04	0.0703	0.0825	0.0868	0.0832	0.0694	0.1189	0.1393	0.0486	0.0684	0.0705	0.0757	0.0827	0.0783	0.1122	0.1218
	435	0.0444	0.0524	0.0578	0.0672	0.0782	0.1007	0.0444	0.056	0.0612	0.0674	0.0595	0.0622	0.0842	0.1114	0.039	0.0635	0.074	0.0782	0.0752	0.0608	0.1007	0.1195	0.0485	0.0612	0.062	0.0671	0.0732	0.0695	0.0954	0.1044
	440	0.0457	0.0494	0.054	0.0635	0.0718	0.09	0.0457	0.0527	0.0571	0.0638	0.0565	0.0572	0.0731	0.0975	0.0411	0.0592	0.0691	0.074	0.072	0.0569	0.0884	0.1044	0.0498	0.0573	0.0581	0.0623	0.0684	0.0674	0.0836	0.0903
	445	0.0451	0.0476	0.0522	0.06	0.0676	0.0815	0.0451	0.0496	0.054	0.0594	0.0537	0.054	0.0644	0.0877	0.041	0.0566	0.0645	0.0693	0.0677	0.053	0.0787	0.0945	0.0483	0.0542	0.054	0.0587	0.0633	0.0634	0.0745	0.0807
	450	0.0442	0.0464	0.0506	0.0578	0.0641	0.0751	0.0442	0.0487	0.0516	0.0566	0.052	0.0515	0.0593	0.0803	0.0401	0.0551	0.0621	0.0663	0.0657	0.0507	0.0723	0.0858	0.0484	0.0513	0.052	0.0561	0.0596	0.0608	0.0681	0.0738
	455	0.0436	0.045	0.0486	0.0559	0.0617	0.0702	0.0436	0.0468	0.0487	0.0551	0.0496	0.0505	0.056	0.0743	0.0391	0.0535	0.0609	0.0625	0.0622	0.0498	0.0674	0.0802	0.0478	0.0496	0.0498	0.0535	0.0553	0.0577	0.064	0.0678
	460	0.0426	0.0439	0.046	0.0536	0.0574	0.0653	0.0426	0.0451	0.0476	0.0524	0.0473	0.0481	0.052	0.069	0.039	0.0512	0.0591	0.0603	0.0606	0.0471	0.0628	0.0744	0.0471	0.0466	0.0478	0.051	0.053	0.0558	0.0587	0.0632
	465	0.0413	0.0413	0.0447	0.0518	0.0546	0.0605	0.0413	0.0442	0.0468	0.0507	0.0458	0.0466	0.0501	0.0655	0.037	0.0497	0.0574	0.0577	0.0582	0.0447	0.0602	0.0718	0.0457	0.0452	0.046	0.0482	0.0501	0.0524	0.0559	0.0608
	470	0.0406	0.041	0.0422	0.0502	0.0522	0.0576	0.0406	0.0439	0.0445	0.0496	0.0443	0.0439	0.0476	0.0621	0.0353	0.0478	0.0551	0.0555	0.0554	0.0427	0.058	0.069	0.0443	0.0425	0.0437	0.0463	0.0483	0.0499	0.0537	0.0578
	475	0.0405	0.0404	0.0436	0.0494	0.0512	0.0561	0.0405	0.0427	0.0453	0.0496	0.0461	0.0453	0.046	0.0612	0.0361	0.0479	0.0544	0.0555	0.0555	0.0437	0.0559	0.0673	0.0439	0.043	0.0438	0.0476	0.0475	0.0505	0.052	0.056
	480	0.0412	0.0408	0.0424	0.0484	0.0516	0.0546	0.0412	0.0428	0.0453	0.0497	0.0451	0.046	0.0469	0.0601	0.0359	0.0488	0.0553	0.0562	0.0543	0.0446	0.0564	0.0662	0.0443	0.0426	0.0434	0.0473	0.0467	0.0498	0.0509	0.0547
	485	0.041	0.0395	0.0418	0.0474	0.0499	0.0551	0.041	0.0413	0.0437	0.0487	0.0442	0.0434	0.043	0.0585	0.0377	0.0485	0.0528	0.0541	0.0549	0.0432	0.0538	0.0632	0.0453	0.0422	0.044	0.0474	0.0474	0.0515	0.0498	0.0529
	490	0.0412	0.039	0.042	0.0479	0.0502	0.054	0.0412	0.0413	0.0436	0.0479	0.0447	0.043	0.0441	0.0581	0.0379	0.0486	0.054	0.0538	0.0544	0.0431	0.0531	0.0639	0.046	0.0425	0.0437	0.047	0.0482	0.052	0.0507	0.0532
	495	0.0416	0.0406	0.0431	0.0483	0.0496	0.054	0.0416	0.0433	0.0449	0.0499	0.0449	0.0457	0.0445	0.0585	0.038	0.049	0.0554	0.0544	0.0542	0.0448	0.0534	0.0641	0.0457	0.042	0.0442	0.0481	0.0487	0.0505	0.0504	0.0534
	500	0.0417	0.0402	0.0422	0.047	0.0493	0.0527	0.0417	0.0427	0.0446	0.0494	0.0447	0.0459	0.0459	0.0571	0.0376	0.048	0.0544	0.0546	0.0544	0.0456	0.053	0.063	0.0449	0.0418	0.0435	0.0476	0.0487	0.051	0.0508	0.0523
	505	0.0413	0.0403	0.0426	0.0477	0.0508	0.0534	0.0413	0.0431	0.0453	0.0496	0.0453	0.046	0.0456	0.057	0.0387	0.0482	0.0555	0.0549	0.0544	0.0449	0.0537	0.0631	0.046	0.0433	0.0444	0.0486	0.0485	0.0518	0.0513	0.0526
	510	0.042	0.0394	0.0421	0.0465	0.0491	0.0533	0.042	0.0425	0.0437	0.0489	0.0453	0.0454	0.0442	0.0568	0.0387	0.0495	0.0548	0.0543	0.0538	0.0434	0.0521	0.0619	0.0451	0.0431	0.045	0.048	0.0476	0.0522	0.0505	0.0512
	515	0.0424	0.0406	0.0424	0.0473	0.0496	0.0531	0.0424	0.0432	0.0447	0.0494	0.0449	0.0453	0.0448	0.056	0.0381	0.0499	0.0548	0.0548	0.0532	0.045	0.0527	0.0628	0.0469	0.044	0.0441	0.0492	0.049	0.0521	0.05	0.0516
	520	0.0415	0.0401	0.0428	0.0488	0.0493	0.0535	0.0415	0.0425	0.0441	0.0496	0.0444	0.0455	0.0436	0.0544	0.0398	0.0491	0.0553	0.0551	0.055	0.0454	0.0518	0.0612	0.0466	0.0421	0.0446	0.0485	0.0505	0.0531	0.0499	0.0509
	525	0.0419	0.0402	0.0428	0.0471	0.0498	0.0522	0.0419	0.0425	0.044	0.0497	0.0428	0.0448	0.044	0.055	0.0374	0.0471	0.0543	0.0547	0.0516	0.0456	0.0516	0.0614	0.0447	0.044	0.0436	0.0475	0.0473	0.0498	0.0506	0.0511
	530	0.0412	0.0395	0.0417	0.0461	0.0484	0.0512	0.0412	0.0412	0.043	0.0478	0.0434	0.0438	0.0424	0.0534	0.0382	0.0471	0.0527	0.0533	0.0521	0.0438	0.0513	0.0597	0.0457	0.0426	0.0434	0.0466	0.0471	0.0511	0.0488	0.0494
	535	0.0419	0.0406	0.0417	0.0474	0.0486	0.052	0.0419	0.0433	0.0444	0.0493	0.0439	0.0447	0.0439	0.0547	0.0395	0.0485	0.0555	0.0546	0.0537	0.0451	0.0509	0.0598	0.0465	0.0419	0.0455	0.0489	0.0488	0.0528	0.0485	0.0501
	540	0.042	0.0415	0.0422	0.0479	0.0488	0.0517	0.042	0.0424	0.0445	0.0485	0.0429	0.046	0.0439	0.0539	0.0385	0.0478	0.0547	0.0539	0.0527	0.045	0.0521	0.0607	0.0474	0.043	0.0454	0.0489	0.0482	0.0523	0.0492	0.0504
	545	0.0416	0.0409	0.0415	0.0461	0.0482	0.0507	0.0416	0.0416	0.0437	0.0485	0.0427	0.0445	0.0432	0.0524	0.0383	0.0479	0.0544	0.0542	0.0519	0.0443	0.05	0.0595	0.0466	0.0417	0.0449	0.0486	0.0483	0.0504	0.0487	0.0494
	550	0.0422	0.0417	0.043	0.0474	0.0491	0.0516	0.0422	0.042	0.0444	0.0489	0.0415	0.0454	0.0483	0.0517	0.038	0.0449	0.0538	0.0536	0.0496	0.0456	0.0534	0.06	0.0457	0.0427	0.0459	0.048	0.0467	0.0487	0.0487	0.0507
	555	0.0418	0.041	0.0425	0.0468	0.0489	0.0514	0.0418	0.0416	0.044	0.0473	0.0424	0.0453	0.0459	0.0512	0.0378	0.0457	0.0549	0.0539	0.0509	0.045	0.0503	0.0594	0.0453	0.0424	0.0458	0.0474	0.0464	0.0488	0.0489	0.0491
	560	0.0424	0.0407	0.042	0.0464	0.048	0.0517	0.0424	0.0431	0.0448	0.0488	0.0441	0.0449	0.0455	0.0516	0.0389	0.0467	0.0562	0.0556	0.0518	0.0452	0.0513	0.0598	0.0467	0.0437	0.0461	0.0484	0.0472	0.0506	0.0496	0.0494
	565	0.0415	0.0415	0.0423	0.0468	0.0489	0.0521	0.0415	0.043	0.0438	0.0469	0.0435	0.0452	0.0455	0.052	0.0407	0.0474	0.0544	0.0542	0.052	0.0462	0.0499	0.0585	0.0464	0.0432	0.0456	0.0472	0.0466	0.0507	0.0498	0.0498
	570	0.0418	0.0408	0.042	0.0459	0.0468	0.0501	0.0418	0.0417	0.0426	0.0469	0.0425	0.0438	0.0446	0.0518	0.0392	0.0466	0.054	0.0536	0.0498	0.0449	0.0503	0.0592	0.0455	0.042	0.0438	0.047	0.0463	0.0488	0.0489	0.0497
	575	0.041	0.0406	0.0414	0.046	0.0473	0.0501	0.041	0.0414	0.0432	0.0475	0.0434	0.0437	0.0443	0.0511	0.0391	0.0476	0.0549	0.0531	0.0502	0.0433	0.05	0.0577	0.045	0.0415	0.0439	0.0455	0.0464	0.0496	0.0491	0.0485
	580	0.0408	0.0395	0.0409	0.0459	0.047	0.0507	0.0408	0.0425	0.0423	0.0475	0.0437	0.0438	0.0458	0.0503	0.0386	0.0466	0.0547	0.0531	0.05	0.0445	0.0512	0.0582	0.0456	0.0411	0.0439	0.0459	0.0472	0.0488	0.049	0.0477
	585	0.041	0.0403	0.042	0.0467	0.0481	0.0511	0.041	0.0425	0.043	0.0462	0.0433	0.0447	0.0453	0.053	0.0377	0.045	0.0525	0.0526	0.0495	0.045	0.0514	0.0592	0.0455	0.0425	0.0444	0.0451	0.0461	0.0485	0.0484	0.0488
	590	0.0417	0.0407	0.0415	0.0459	0.0477	0.0507	0.0417	0.0411	0.0427	0.0459	0.0426	0.044	0.0433	0.0534	0.0387	0.0442	0.0525	0.0535	0.0501	0.0446	0.0495	0.0582	0.0457	0.0418	0.0438	0.0453	0.0456	0.0482	0.047	0.0487
	595	0.0402	0.0396	0.041	0.044	0.0466	0.0493	0.0402	0.0412	0.0429	0.0447	0.0426	0.044	0.043	0.0523	0.0389	0.0458	0.0512	0.0522	0.0493	0.0434	0.0503	0.0559	0.0457	0.0423	0.0426	0.0445	0.046	0.0496	0.0458	0.0475
	600	0.0407	0.0406	0.0421	0.0448	0.0476	0.0499	0.0407	0.0412	0.0423	0.0451	0.042	0.0437	0.0426	0.052	0.0374	0.044	0.0507	0.052	0.0493	0.0432	0.0494	0.0564	0.0458	0.0427	0.0429	0.0449	0.0452	0.0483	0.0474	0.0488
	605	0.041	0.0398	0.0423	0.0452	0.048	0.0503	0.041	0.0412	0.0415	0.0436	0.0429	0.0435	0.0437	0.0502	0.0369	0.045	0.0511	0.0529	0.0493	0.0431	0.05	0.0563	0.0452	0.043	0.0428	0.0447	0.0458	0.0478	0.0468	0.0462
	610	0.0414	0.0393	0.0417	0.0447	0.0464	0.0494	0.0414	0.0403	0.0427	0.0442	0.0421	0.0433	0.0417	0.0505	0.0394	0.0459	0.0517	0.0532	0.0497	0.0426	0.0491	0.0545	0.0462	0.0423	0.0443	0.0447	0.0459	0.0501	0.0461	0.0452
	615	0.0413	0.04	0.0417	0.0445	0.0465	0.0493	0.0413	0.0401	0.0419	0.0439	0.0425	0.0421	0.041	0.0508	0.0393	0.0455	0.0514	0.0526	0.0505	0.0426	0.049	0.0539	0.0466	0.0421	0.0433	0.0444	0.0456	0.0501	0.0467	0.0471
	620	0.0408	0.0408	0.0414	0.0452	0.0465	0.0485	0.0408	0.0422	0.0421	0.044	0.0433	0.0438	0.042	0.0499	0.0383	0.0447	0.052	0.053	0.0498	0.0428	0.0496	0.0545	0.0459	0.0421	0.0452	0.0454	0.0473	0.0481	0.0467	0.0457
	625	0.0399	0.0395	0.0423	0.0447	0.0468	0.0494	0.0399	0.04	0.0422	0.0442	0.043	0.0429	0.0397	0.049	0.0389	0.0443	0.051	0.0524	0.05	0.0419	0.0483	0.0545	0.0455	0.0403	0.0441	0.0444	0.0463	0.0484	0.0461	0.046
	630	0.0394	0.0398	0.0399	0.0441	0.046	0.0485	0.0394	0.0402	0.0399	0.0436	0.0424	0.042	0.0403	0.0494	0.0376	0.0443	0.0503	0.0515	0.0484	0.0411	0.0482	0.0538	0.0445	0.0406	0.0437	0.0432	0.0454	0.0481	0.045	0.0458
	635	0.0404	0.0399	0.0404	0.0438	0.0465	0.0493	0.0404	0.04	0.0411	0.0432	0.0418	0.0422	0.0404	0.0481	0.0383	0.0437	0.05	0.051	0.0479	0.0413	0.0483	0.0537	0.0457	0.0395	0.0438	0.0428	0.045	0.0477	0.0438	0.0456
	640	0.0399	0.0387	0.0403	0.0436	0.046	0.0482	0.0399	0.0398	0.0401	0.0423	0.0409	0.0418	0.0409	0.0471	0.0364	0.0442	0.0496	0.0516	0.0469	0.0408	0.0477	0.0537	0.0439	0.0396	0.0421	0.0418	0.0445	0.0475	0.0446	0.0453
	645	0.0402	0.0389	0.0409	0.0437	0.0462	0.0479	0.0402	0.0387	0.0397	0.0423	0.0416	0.0418	0.0392	0.0466	0.038	0.0452	0.0509	0.0505	0.0454	0.0403	0.0481	0.054	0.0435	0.0394	0.0412	0.0414	0.0445	0.0462	0.0438	0.0441
	650	0.041	0.0392	0.0389	0.0442	0.0453	0.0476	0.041	0.0392	0.0398	0.0422	0.0426	0.0411	0.0391	0.0473	0.0375	0.0438	0.0504	0.0503	0.0463	0.0397	0.0474	0.0534	0.043	0.0391	0.0416	0.0408	0.0454	0.0469	0.0432	0.0449
	655	0.0409	0.0401	0.0399	0.0444	0.0464	0.0482	0.0409	0.0385	0.0378	0.0411	0.0407	0.0407	0.0392	0.0463	0.0363	0.0422	0.0486	0.0496	0.0444	0.0389	0.0464	0.0521	0.0426	0.0385	0.0403	0.0399	0.0438	0.0463	0.0422	0.0444
	660	0.0391	0.0371	0.0387	0.0417	0.0444	0.0476	0.0391	0.0385	0.0406	0.0428	0.0407	0.0401	0.0388	0.0473	0.0373	0.0432	0.0487	0.0498	0.0469	0.0409	0.0461	0.0516	0.0429	0.0398	0.0405	0.042	0.0446	0.0476	0.0432	0.043
	665	0.0408	0.0398	0.0396	0.0432	0.0454	0.0487	0.0408	0.0378	0.0402	0.0424	0.0414	0.0406	0.0398	0.0474	0.0369	0.0427	0.0485	0.0505	0.0454	0.0399	0.0483	0.0506	0.0426	0.0376	0.042	0.0424	0.0437	0.0467	0.0415	0.0428
	670	0.0398	0.0385	0.0395	0.0438	0.0447	0.0492	0.0398	0.0387	0.0396	0.0417	0.0401	0.0405	0.0379	0.0456	0.0376	0.0432	0.0469	0.0489	0.0453	0.0388	0.0461	0.0495	0.0414	0.0401	0.041	0.0406	0.0433	0.0449	0.0435	0.0425
	675	0.0413	0.0372	0.0397	0.0425	0.0446	0.0476	0.0413	0.0388	0.0393	0.0416	0.0407	0.0405	0.0382	0.046	0.037	0.0419	0.0479	0.0499	0.0448	0.0401	0.0459	0.0494	0.0425	0.0391	0.0407	0.0413	0.0442	0.0465	0.0426	0.0428
	680	0.0386	0.0363	0.0372	0.0422	0.0434	0.0452	0.0386	0.0377	0.0394	0.042	0.0413	0.0408	0.0373	0.0459	0.0376	0.0439	0.0476	0.0511	0.0462	0.0405	0.0452	0.0509	0.0426	0.0393	0.0425	0.0424	0.0438	0.0466	0.0421	0.0427
	685	0.0399	0.0373	0.0393	0.0437	0.044	0.0467	0.0399	0.0375	0.0389	0.0431	0.0405	0.0408	0.0375	0.0461	0.0369	0.0425	0.0473	0.0499	0.0464	0.0398	0.0445	0.0502	0.0407	0.0382	0.0414	0.0411	0.0428	0.0467	0.0421	0.0428
	690	0.0401	0.0365	0.0385	0.0426	0.0434	0.0466	0.0401	0.0386	0.039	0.0422	0.0422	0.0416	0.0376	0.0453	0.0393	0.0432	0.0472	0.0511	0.0461	0.0415	0.0449	0.0485	0.0426	0.0379	0.0415	0.0425	0.0442	0.0459	0.0415	0.0417
	695	0.0391	0.0375	0.0392	0.0443	0.0444	0.0479	0.0391	0.038	0.0383	0.041	0.0422	0.0417	0.0381	0.0452	0.0364	0.0407	0.0466	0.0493	0.0453	0.0397	0.0461	0.0494	0.0397	0.0386	0.0391	0.0411	0.0421	0.0446	0.0423	0.0414
	700	0.0398	0.0383	0.0386	0.0426	0.0442	0.0465	0.0398	0.0388	0.0394	0.0406	0.04	0.0413	0.0384	0.047	0.0384	0.0433	0.0476	0.05	0.0458	0.0395	0.0455	0.05	0.0418	0.0384	0.0403	0.0415	0.0433	0.0468	0.0425	0.0422
	705	0.0416	0.0384	0.039	0.0429	0.0439	0.0468	0.0416	0.0384	0.0397	0.042	0.0408	0.0413	0.0397	0.0469	0.0375	0.0415	0.0467	0.0493	0.0454	0.0393	0.0457	0.05	0.0408	0.038	0.0402	0.0412	0.0436	0.0465	0.0439	0.0429
	710	0.0404	0.0378	0.0388	0.0442	0.0441	0.0465	0.0404	0.0375	0.0382	0.0406	0.0397	0.0404	0.0384	0.0456	0.0369	0.0405	0.0458	0.0487	0.0446	0.0387	0.0451	0.0492	0.0385	0.0376	0.0397	0.0407	0.0425	0.0456	0.0436	0.0418
	715	0.0411	0.0406	0.0405	0.0443	0.0454	0.0477	0.0411	0.0375	0.0384	0.0411	0.0407	0.0407	0.0377	0.0469	0.0374	0.0405	0.0468	0.0496	0.0451	0.0405	0.0454	0.0496	0.0396	0.0389	0.0399	0.0406	0.043	0.0461	0.0435	0.0428
	720	0.0407	0.04	0.0394	0.0424	0.0444	0.0476	0.0407	0.0387	0.0395	0.0429	0.0417	0.0421	0.0379	0.0476	0.0392	0.0437	0.0473	0.051	0.0461	0.0408	0.0453	0.049	0.0408	0.0396	0.042	0.0422	0.0436	0.0464	0.0443	0.0442
	725	0.0435	0.0402	0.0417	0.0443	0.0467	0.0489	0.0435	0.0403	0.0401	0.0438	0.0428	0.0432	0.0384	0.0478	0.0408	0.0457	0.05	0.0531	0.0475	0.0426	0.0451	0.0502	0.0412	0.0375	0.0443	0.0438	0.0456	0.0481	0.0435	0.0442
	730	0.043	0.0418	0.0431	0.0462	0.0476	0.0489	0.043	0.0414	0.0426	0.0446	0.0433	0.0445	0.0425	0.0499	0.0424	0.0463	0.0519	0.0542	0.0492	0.0439	0.0481	0.052	0.0425	0.0424	0.0456	0.0463	0.0467	0.0507	0.0463	0.0473
	735	0.0433	0.0428	0.0439	0.0466	0.0484	0.0503	0.0433	0.0439	0.0451	0.0473	0.046	0.0476	0.044	0.0523	0.0444	0.049	0.0536	0.056	0.0518	0.0479	0.0488	0.0532	0.046	0.0436	0.0477	0.048	0.049	0.0533	0.0467	0.0486
	740	0.0467	0.0447	0.0454	0.0483	0.0504	0.0522	0.0467	0.045	0.0464	0.0481	0.0473	0.0482	0.0454	0.0522	0.0455	0.0495	0.0554	0.0573	0.0534	0.0474	0.0508	0.0561	0.0461	0.0445	0.0483	0.0499	0.0501	0.053	0.0468	0.0499
	745	0.0456	0.0439	0.0451	0.0487	0.05	0.0528	0.0456	0.0458	0.0477	0.0494	0.0462	0.048	0.0468	0.0535	0.0455	0.0505	0.0558	0.0568	0.053	0.0484	0.0516	0.0548	0.0471	0.0453	0.0495	0.0488	0.0512	0.0546	0.0501	0.0507
	750	0.0465	0.0455	0.0457	0.0498	0.0516	0.0533	0.0465	0.0452	0.047	0.049	0.0476	0.0481	0.0453	0.0535	0.0452	0.0501	0.0555	0.0569	0.0531	0.0479	0.0501	0.0553	0.0465	0.0441	0.0483	0.0496	0.052	0.0542	0.0484	0.0499
	755	0.0461	0.0444	0.0458	0.0473	0.0503	0.052	0.0461	0.0454	0.0465	0.0488	0.0477	0.0476	0.0459	0.054	0.0451	0.052	0.0546	0.0571	0.0535	0.0485	0.0505	0.0556	0.0469	0.0441	0.0502	0.0492	0.0514	0.0533	0.0485	0.0501
	760	0.0471	0.0451	0.0469	0.0482	0.0512	0.0517	0.0471	0.046	0.0461	0.0474	0.0473	0.0475	0.0452	0.0539	0.0448	0.0502	0.0546	0.0575	0.0528	0.0482	0.0497	0.0554	0.0451	0.0457	0.049	0.0487	0.0518	0.0539	0.0482	0.0494
	765	0.0461	0.0438	0.0458	0.0475	0.0494	0.052	0.0461	0.0458	0.0464	0.0478	0.0481	0.0488	0.0454	0.0538	0.0455	0.051	0.0551	0.0574	0.0519	0.049	0.0503	0.0545	0.0452	0.0462	0.0484	0.0482	0.0514	0.0533	0.0497	0.0492
	770	0.0468	0.0447	0.0451	0.0489	0.051	0.0529	0.0468	0.0456	0.047	0.049	0.0462	0.0478	0.046	0.0529	0.0457	0.0506	0.0548	0.0561	0.0514	0.0481	0.051	0.0544	0.0459	0.0439	0.0482	0.0486	0.0514	0.0528	0.0472	0.0488
	775	0.0447	0.0444	0.045	0.0476	0.0493	0.0524	0.0447	0.0458	0.0473	0.0494	0.0462	0.0483	0.0466	0.0521	0.0449	0.0504	0.0551	0.0568	0.0519	0.0495	0.0497	0.0538	0.0461	0.0443	0.0488	0.049	0.0512	0.0533	0.0483	0.0489
	780	0.0455	0.0452	0.0451	0.0471	0.0506	0.0512	0.0455	0.045	0.0475	0.0481	0.0462	0.0472	0.0458	0.0535	0.0448	0.0498	0.054	0.0565	0.0522	0.0476	0.0488	0.0543	0.0463	0.0437	0.0481	0.048	0.0506	0.0527	0.0469	0.0493
	785	0.0444	0.0439	0.0453	0.0465	0.0503	0.052	0.0444	0.0449	0.0472	0.048	0.0452	0.0484	0.0446	0.0524	0.0443	0.0508	0.0545	0.0568	0.0508	0.0483	0.0493	0.0535	0.0448	0.0435	0.0484	0.0484	0.0516	0.0527	0.0468	0.049
	790	0.0437	0.0436	0.0444	0.0465	0.0483	0.0497	0.0437	0.0446	0.0474	0.0474	0.0444	0.0474	0.0452	0.0522	0.0443	0.0494	0.053	0.0556	0.0504	0.0478	0.0494	0.0533	0.045	0.0448	0.048	0.0474	0.0502	0.0512	0.0455	0.0476
	795	0.0444	0.0444	0.0471	0.0474	0.0492	0.0513	0.0444	0.0442	0.0461	0.0471	0.0453	0.0471	0.0444	0.0509	0.0441	0.0494	0.0543	0.056	0.0513	0.0483	0.0483	0.0527	0.0446	0.0436	0.0482	0.0477	0.0506	0.0525	0.0451	0.0477
	800	0.0439	0.0436	0.0453	0.0466	0.0478	0.051	0.0439	0.0444	0.0456	0.0466	0.0445	0.0464	0.0451	0.0514	0.0428	0.048	0.0512	0.0546	0.0507	0.0477	0.0476	0.0524	0.0434	0.0432	0.0483	0.0454	0.0477	0.0526	0.0452	0.0471

## Sheet: Figure S1_2_2_5_mM
	Aluminum Chelation, Run 1																										Aluminum Chelation, Run 2
	Blank = 295 μL Water + 5 μL DMSO																										Blank = 295 μL Water + 5 μL DMSO
	[Al3+] (µM)	Blank	0	0.00762939	0.0152588	0.0305176	0.0610352	0.12207	0.244141	0.488281	0.976562	1.95312	3.90625	7.8125	15.625	31.25	62.5	125	250	500	1000	2000	4000	8000	16000		[Al3+] (µM)	Blank	0	0.00762939	0.0152588	0.0305176	0.0610352	0.12207	0.244141	0.488281	0.976562	1.95312	3.90625	7.8125	15.625	31.25	62.5	125	250	500	1000	2000	4000
	Wavelength (nm)	Absorbance																									Wavelength (nm)	Absorbance
	300	0.337	0.6658	0.6683	0.6758	0.6744	0.6701	0.6865	0.6643	0.6713	0.6632	0.6887	0.5447	0.6751	0.6751	0.663	0.6866	0.6778	0.6568	0.6321	0.6469	0.6556	0.638	0.622	0.6374		300	0.3315	0.6823	0.6715	0.6745	0.6624	0.6376	0.6821	0.6744	0.6595	0.6717	0.6791	0.6676	0.6686	0.6668	0.6783	0.6497	0.5959	0.6593	0.6405	0.6455	0.6316	0.6276
	305	0.199	0.5302	0.5345	0.5406	0.5364	0.5352	0.55	0.5321	0.5391	0.5289	0.5447	0.4936	0.5376	0.5376	0.5312	0.5425	0.523	0.4996	0.4839	0.483	0.4869	0.4682	0.4584	0.4662		305	0.1952	0.5442	0.5327	0.5368	0.5335	0.5029	0.5459	0.5387	0.5289	0.5343	0.5396	0.53	0.5308	0.5242	0.5231	0.4948	0.4393	0.4921	0.4758	0.475	0.4651	0.4572
	310	0.1429	0.4833	0.4901	0.4925	0.489	0.4885	0.5006	0.4859	0.4912	0.4819	0.4936	0.4862	0.4826	0.4826	0.4798	0.4783	0.4527	0.4214	0.3992	0.3915	0.3885	0.3686	0.3598	0.3634		310	0.14	0.4974	0.4846	0.4895	0.4883	0.4541	0.4982	0.491	0.4836	0.4843	0.4893	0.4802	0.4777	0.4624	0.4498	0.4157	0.3573	0.397	0.3796	0.3718	0.3646	0.3561
	315	0.1231	0.4781	0.4851	0.4883	0.4833	0.4833	0.4948	0.4799	0.4854	0.475	0.4862	0.4932	0.4741	0.4741	0.4721	0.462	0.4297	0.3939	0.3702	0.3555	0.3452	0.3262	0.3185	0.3181		315	0.121	0.4917	0.4784	0.4835	0.4833	0.4473	0.4922	0.4861	0.4779	0.4772	0.4824	0.4713	0.4701	0.4466	0.4262	0.3901	0.3289	0.3608	0.3401	0.329	0.3209	0.3115
	320	0.1095	0.4863	0.4944	0.4969	0.4914	0.4933	0.5044	0.489	0.4943	0.4834	0.4932	0.5109	0.4811	0.4811	0.4774	0.4624	0.4233	0.3872	0.362	0.3426	0.3315	0.3122	0.3036	0.3025		320	0.1074	0.5009	0.4862	0.4935	0.4929	0.4536	0.5031	0.4938	0.4873	0.4853	0.4914	0.479	0.4763	0.4481	0.4226	0.3838	0.3173	0.3482	0.3269	0.3134	0.3062	0.2965
	325	0.0965	0.5044	0.5144	0.5167	0.5098	0.5117	0.5239	0.5086	0.5131	0.5014	0.5109	0.5325	0.4969	0.4969	0.4931	0.4723	0.4307	0.3929	0.3673	0.345	0.3314	0.3116	0.3036	0.2997		325	0.0948	0.5203	0.5035	0.5109	0.512	0.4689	0.5221	0.5132	0.5068	0.5025	0.5088	0.4945	0.4925	0.46	0.4285	0.3893	0.3184	0.3495	0.3283	0.3134	0.305	0.2937
	330	0.0871	0.5267	0.5367	0.5386	0.5325	0.5339	0.5486	0.5316	0.5347	0.5242	0.5325	0.5619	0.5193	0.5193	0.5129	0.4919	0.4454	0.4084	0.3802	0.3534	0.3382	0.3163	0.3085	0.3027		330	0.0854	0.5429	0.5244	0.5344	0.5356	0.4872	0.5456	0.5358	0.5297	0.524	0.5313	0.5146	0.5142	0.4788	0.444	0.4047	0.3264	0.3593	0.3355	0.3182	0.3091	0.296
	335	0.079	0.556	0.5669	0.5708	0.5627	0.5645	0.5825	0.5611	0.5663	0.5533	0.5619	0.5849	0.548	0.548	0.54	0.5182	0.4693	0.4322	0.4016	0.3699	0.3512	0.3283	0.3182	0.3103		335	0.077	0.574	0.554	0.5637	0.5662	0.5136	0.5773	0.5669	0.5602	0.5545	0.5623	0.544	0.5415	0.5071	0.4668	0.4276	0.3404	0.3749	0.3493	0.33	0.3191	0.303
	340	0.0679	0.5788	0.5902	0.5938	0.5858	0.5882	0.6081	0.585	0.5897	0.5758	0.5849	0.6084	0.5716	0.5716	0.5626	0.5393	0.4862	0.4505	0.4186	0.3819	0.3594	0.3353	0.3232	0.3128		340	0.0669	0.5975	0.5753	0.5875	0.5893	0.5321	0.601	0.5893	0.5838	0.5772	0.5863	0.5657	0.5656	0.5297	0.4854	0.4464	0.3512	0.3884	0.3587	0.3352	0.3236	0.3038
	345	0.0609	0.6017	0.6144	0.6177	0.6096	0.6119	0.6363	0.6084	0.6138	0.5987	0.6084	0.624	0.5945	0.5945	0.5837	0.5631	0.5089	0.4726	0.4391	0.3982	0.3733	0.3461	0.3337	0.3195		345	0.0604	0.6218	0.5979	0.6107	0.6139	0.5528	0.6261	0.6143	0.6068	0.5994	0.6089	0.5889	0.5874	0.553	0.507	0.4675	0.3645	0.4058	0.3729	0.3482	0.3327	0.3109
	350	0.0566	0.6187	0.6307	0.6342	0.6245	0.6288	0.6558	0.6242	0.6302	0.6145	0.624	0.6295	0.61	0.61	0.5982	0.5792	0.524	0.49	0.4568	0.4116	0.3859	0.3582	0.3432	0.328		350	0.0556	0.6381	0.6139	0.627	0.6299	0.5673	0.6423	0.6299	0.6236	0.6166	0.6266	0.6048	0.603	0.5704	0.5238	0.4844	0.3782	0.4204	0.3866	0.3597	0.3428	0.3189
	355	0.053	0.6236	0.6365	0.6384	0.6295	0.6337	0.665	0.6286	0.636	0.6191	0.6295	0.6148	0.6162	0.6162	0.6031	0.5891	0.5358	0.5054	0.4725	0.4285	0.4037	0.3742	0.359	0.3441		355	0.0529	0.6451	0.6192	0.6308	0.6352	0.5702	0.6475	0.6341	0.6289	0.6227	0.6324	0.6095	0.6093	0.5822	0.5339	0.4997	0.3899	0.437	0.4035	0.3769	0.3595	0.3344
	360	0.0503	0.6085	0.6204	0.6215	0.6134	0.6175	0.6517	0.6128	0.6205	0.6042	0.6148	0.5839	0.6034	0.6034	0.5886	0.5832	0.535	0.5089	0.4806	0.4397	0.417	0.3871	0.3726	0.3578		360	0.0497	0.6279	0.6023	0.6137	0.6193	0.5551	0.6319	0.6179	0.613	0.6061	0.6169	0.5966	0.5957	0.5758	0.5329	0.5028	0.3961	0.4482	0.4171	0.3899	0.3729	0.3478
	365	0.0476	0.5771	0.5887	0.5889	0.5803	0.5855	0.6212	0.5805	0.5885	0.5731	0.5839	0.5381	0.5747	0.5747	0.5613	0.5659	0.5241	0.5048	0.4827	0.4465	0.4273	0.3983	0.3847	0.3709		365	0.0464	0.5959	0.571	0.5813	0.5863	0.5253	0.5984	0.5853	0.5815	0.5752	0.586	0.568	0.5679	0.558	0.5222	0.4991	0.3988	0.4549	0.4282	0.4014	0.3845	0.3605
	370	0.0473	0.5305	0.5417	0.5409	0.5322	0.5385	0.5728	0.5333	0.541	0.5259	0.5381	0.4672	0.5342	0.5342	0.5206	0.5407	0.5088	0.4995	0.485	0.4574	0.4445	0.4156	0.4032	0.3932		370	0.0465	0.5475	0.5258	0.5328	0.5392	0.4835	0.5503	0.5383	0.5338	0.5286	0.5414	0.5279	0.5275	0.5315	0.5077	0.4941	0.4039	0.4654	0.4453	0.419	0.4044	0.3816
	375	0.0444	0.4577	0.4674	0.4639	0.4581	0.4644	0.4985	0.4604	0.4676	0.4549	0.4672	0.3886	0.4683	0.4683	0.457	0.4984	0.4802	0.4848	0.4846	0.4674	0.4641	0.4377	0.428	0.4192		375	0.0441	0.4721	0.4531	0.4585	0.4653	0.4173	0.474	0.4646	0.4608	0.4584	0.4698	0.4623	0.4623	0.4871	0.4792	0.4802	0.4034	0.4755	0.4647	0.4401	0.427	0.4072
	380	0.0413	0.3779	0.3853	0.3819	0.3775	0.3835	0.4144	0.3806	0.3874	0.3768	0.3886	0.321	0.3967	0.3967	0.3855	0.45	0.4481	0.4698	0.4824	0.4783	0.4857	0.461	0.4549	0.4488		380	0.0404	0.3904	0.3738	0.3773	0.3821	0.3432	0.3906	0.3832	0.3813	0.3792	0.3923	0.3891	0.3924	0.4372	0.4466	0.4654	0.4042	0.487	0.4862	0.465	0.4545	0.4352
	385	0.0424	0.3075	0.3136	0.3094	0.3071	0.3116	0.3382	0.3095	0.3167	0.3066	0.321	0.2527	0.335	0.335	0.324	0.4099	0.422	0.4604	0.4872	0.4968	0.513	0.4922	0.4899	0.4865		385	0.0415	0.3182	0.3047	0.3052	0.311	0.2796	0.3165	0.311	0.3102	0.3105	0.3226	0.327	0.3314	0.395	0.42	0.4547	0.4098	0.5048	0.5144	0.4963	0.4879	0.4727
	390	0.0413	0.2378	0.242	0.2371	0.2369	0.24	0.2629	0.2403	0.246	0.2394	0.2527	0.1932	0.2722	0.2722	0.2626	0.3673	0.3935	0.4477	0.4879	0.5113	0.5417	0.5234	0.5261	0.5265		390	0.0409	0.2462	0.2356	0.2352	0.2396	0.2171	0.2443	0.2397	0.2413	0.243	0.2549	0.2626	0.2695	0.3515	0.3923	0.442	0.4135	0.5197	0.5426	0.5276	0.524	0.5109
	395	0.042	0.1778	0.1793	0.1753	0.1761	0.1786	0.196	0.1789	0.1843	0.1811	0.1932	0.1503	0.2167	0.2167	0.2079	0.3266	0.3647	0.4328	0.4872	0.5246	0.5673	0.5556	0.5616	0.568		395	0.0404	0.1836	0.1752	0.1738	0.1776	0.1621	0.1812	0.1792	0.1798	0.1834	0.1939	0.2076	0.2143	0.3097	0.3637	0.428	0.4138	0.5333	0.5691	0.559	0.5606	0.551
	400	0.04	0.1321	0.1342	0.1312	0.1307	0.1329	0.1471	0.1354	0.1399	0.1386	0.1503	0.1133	0.1758	0.1758	0.1678	0.2936	0.3395	0.4167	0.4815	0.5325	0.5888	0.5805	0.593	0.604		400	0.0408	0.1378	0.1323	0.1303	0.1324	0.1222	0.1361	0.1348	0.1359	0.1396	0.15	0.167	0.1723	0.2762	0.338	0.4116	0.4116	0.5404	0.5896	0.5843	0.5907	0.5869
	405	0.0378	0.0951	0.0969	0.0941	0.0941	0.0965	0.1045	0.0988	0.1027	0.1019	0.1133	0.0915	0.1401	0.1401	0.1332	0.2605	0.3104	0.3936	0.4667	0.5296	0.6011	0.5985	0.6179	0.6343		405	0.0382	0.0993	0.0951	0.094	0.0954	0.0898	0.0973	0.0978	0.0998	0.1032	0.1139	0.1306	0.1381	0.2422	0.3083	0.3896	0.4001	0.5373	0.6015	0.6023	0.6156	0.6171
	410	0.0386	0.0759	0.0767	0.0738	0.0743	0.076	0.0821	0.0784	0.0811	0.0818	0.0915	0.0765	0.1178	0.1178	0.1122	0.2368	0.2868	0.3696	0.4471	0.5202	0.6016	0.6048	0.6312	0.6535		410	0.038	0.0798	0.0764	0.0743	0.075	0.0711	0.0762	0.0775	0.0785	0.0842	0.092	0.11	0.1158	0.2178	0.284	0.3658	0.3855	0.526	0.603	0.6082	0.6287	0.6357
	415	0.0386	0.062	0.0629	0.0605	0.0615	0.0628	0.0654	0.0649	0.0679	0.0672	0.0765	0.0625	0.1017	0.1017	0.0954	0.2108	0.2596	0.3395	0.4218	0.501	0.5959	0.6032	0.6361	0.6657		415	0.038	0.0663	0.0622	0.0606	0.0613	0.0593	0.0636	0.0643	0.0655	0.0693	0.0765	0.0929	0.1002	0.1933	0.2572	0.3365	0.3659	0.5087	0.595	0.6065	0.6346	0.646
	420	0.0351	0.0486	0.049	0.0489	0.0485	0.0492	0.0496	0.0529	0.0539	0.0544	0.0625	0.0563	0.0834	0.0834	0.0799	0.1814	0.2252	0.3	0.3819	0.4668	0.5713	0.5824	0.622	0.6585		420	0.0345	0.0523	0.049	0.0486	0.0496	0.0471	0.0512	0.0503	0.052	0.0562	0.0625	0.0773	0.083	0.1635	0.2234	0.2969	0.3343	0.474	0.5703	0.5865	0.6205	0.6386
	425	0.0359	0.045	0.0446	0.0447	0.0453	0.0449	0.0457	0.0473	0.0497	0.0505	0.0563	0.0554	0.0732	0.0732	0.0725	0.1617	0.1997	0.2692	0.349	0.4359	0.5439	0.5602	0.6024	0.6407		425	0.036	0.0486	0.0453	0.0451	0.0449	0.0434	0.0455	0.0454	0.0477	0.0516	0.0552	0.0685	0.0726	0.144	0.1979	0.2672	0.3069	0.441	0.5435	0.5628	0.5995	0.6219
	430	0.0376	0.0447	0.0452	0.0452	0.0458	0.0458	0.0464	0.0482	0.0499	0.0488	0.0554	0.0506	0.0707	0.0707	0.0699	0.1483	0.1805	0.243	0.3193	0.4054	0.5179	0.5325	0.5767	0.6195		430	0.0372	0.048	0.0446	0.0462	0.046	0.0445	0.0466	0.0472	0.0476	0.0515	0.0546	0.066	0.07	0.13	0.178	0.2402	0.2838	0.4135	0.5133	0.5357	0.576	0.5999
	435	0.0372	0.0425	0.0438	0.0442	0.0453	0.0451	0.0444	0.0463	0.0489	0.0458	0.0506	0.0461	0.066	0.066	0.0651	0.1313	0.1567	0.2099	0.2828	0.3635	0.4742	0.4878	0.5347	0.5778		435	0.0365	0.0463	0.0436	0.0446	0.0452	0.0444	0.0455	0.0459	0.0459	0.0492	0.0517	0.0617	0.0651	0.1122	0.1532	0.2086	0.2513	0.3713	0.468	0.4914	0.5345	0.5575
	440	0.0346	0.039	0.0384	0.0408	0.0408	0.0401	0.0399	0.0424	0.044	0.0418	0.0461	0.0447	0.0566	0.0566	0.0572	0.1122	0.1312	0.1758	0.2404	0.3144	0.4166	0.4312	0.4744	0.5156		440	0.0347	0.0426	0.0394	0.0412	0.0405	0.0395	0.041	0.0408	0.0412	0.0441	0.0445	0.0535	0.0558	0.0927	0.1282	0.1741	0.216	0.3209	0.4119	0.4346	0.4742	0.4975
	445	0.0359	0.0396	0.039	0.041	0.0408	0.0401	0.0402	0.0412	0.0431	0.0419	0.0447	0.0426	0.0526	0.0526	0.0544	0.0997	0.1129	0.1503	0.206	0.2714	0.3612	0.3748	0.4143	0.4506		445	0.0363	0.0426	0.04	0.0405	0.0406	0.0397	0.0411	0.0405	0.0414	0.0432	0.0437	0.051	0.0521	0.081	0.1111	0.1492	0.1875	0.2763	0.3577	0.3779	0.4146	0.4352
	450	0.0348	0.0379	0.037	0.0389	0.0396	0.038	0.0378	0.0401	0.0404	0.0397	0.0426	0.0422	0.0473	0.0473	0.0502	0.0887	0.096	0.1253	0.1727	0.229	0.3041	0.3163	0.3507	0.3812		450	0.035	0.0409	0.0373	0.0389	0.0387	0.0376	0.0398	0.0375	0.0392	0.0409	0.0407	0.0469	0.0468	0.0702	0.0942	0.1253	0.1576	0.2302	0.3008	0.3182	0.349	0.3679
	455	0.0356	0.0385	0.0375	0.0392	0.0397	0.0384	0.0391	0.0406	0.0406	0.0402	0.0422	0.0413	0.0458	0.0458	0.05	0.0811	0.0839	0.1063	0.1444	0.1884	0.2504	0.2588	0.2872	0.3127		455	0.0363	0.0416	0.0385	0.0404	0.0385	0.0376	0.0407	0.0393	0.0402	0.0418	0.0404	0.0459	0.0449	0.0621	0.0825	0.1063	0.1332	0.1909	0.247	0.2606	0.2877	0.3017
	460	0.0358	0.0379	0.0376	0.039	0.04	0.0383	0.0388	0.04	0.0409	0.0396	0.0413	0.0402	0.0443	0.0443	0.048	0.0747	0.0728	0.0889	0.1178	0.1488	0.1971	0.201	0.2231	0.2419		460	0.0351	0.0418	0.0375	0.0395	0.0386	0.0384	0.04	0.0384	0.0396	0.0408	0.0398	0.044	0.0438	0.0556	0.0709	0.0876	0.109	0.1512	0.1924	0.2028	0.2247	0.2323
	465	0.0357	0.0381	0.0381	0.0399	0.0406	0.0387	0.0386	0.0412	0.0415	0.0385	0.0402	0.0418	0.0453	0.0453	0.0486	0.0707	0.0661	0.0743	0.0988	0.1214	0.1593	0.159	0.1771	0.1911		465	0.0343	0.0416	0.0377	0.0406	0.0399	0.039	0.04	0.0387	0.0407	0.0413	0.0402	0.0441	0.0447	0.0508	0.064	0.0736	0.0917	0.1244	0.1536	0.161	0.1782	0.1833
	470	0.0353	0.0378	0.0399	0.0413	0.0418	0.0405	0.0414	0.0415	0.0429	0.0395	0.0418	0.0412	0.0481	0.0481	0.049	0.071	0.0623	0.068	0.0856	0.0993	0.1283	0.1251	0.1389	0.1491		470	0.0356	0.0425	0.0386	0.041	0.0423	0.042	0.0426	0.0416	0.0399	0.0432	0.0417	0.0447	0.0483	0.0494	0.0591	0.0658	0.0798	0.1041	0.1216	0.1273	0.1421	0.1435
	475	0.0356	0.0376	0.0393	0.0406	0.042	0.0398	0.0398	0.0412	0.0425	0.0373	0.0412	0.0397	0.0456	0.0456	0.0476	0.066	0.0556	0.0602	0.0721	0.0794	0.0988	0.0951	0.107	0.1142		475	0.0342	0.0411	0.0381	0.0404	0.0407	0.0408	0.0416	0.0397	0.0398	0.0429	0.0402	0.0435	0.0455	0.0456	0.0533	0.0563	0.0673	0.0821	0.0935	0.0981	0.1077	0.1085
	480	0.0351	0.0361	0.0382	0.0397	0.0405	0.0396	0.0388	0.0401	0.0406	0.0378	0.0397	0.036	0.0442	0.0442	0.0456	0.0632	0.0497	0.0518	0.0614	0.065	0.0773	0.0734	0.0822	0.087		480	0.0337	0.0402	0.0363	0.0392	0.0396	0.0389	0.0395	0.0383	0.0394	0.0407	0.0388	0.0426	0.0435	0.0428	0.0492	0.0497	0.0579	0.0674	0.0737	0.0756	0.0834	0.0819
	485	0.034	0.0346	0.034	0.0351	0.036	0.0355	0.0352	0.0353	0.0372	0.0354	0.036	0.0366	0.037	0.037	0.0409	0.0552	0.0424	0.042	0.0498	0.0518	0.0579	0.0559	0.0612	0.0655		485	0.0325	0.0376	0.0347	0.0354	0.0358	0.0347	0.0362	0.0344	0.0357	0.0361	0.0355	0.0374	0.0368	0.0369	0.0425	0.0428	0.0485	0.0521	0.0556	0.0564	0.0615	0.0618
	490	0.0335	0.0345	0.0355	0.0364	0.0383	0.0354	0.0356	0.0365	0.0379	0.0353	0.0366	0.0372	0.0383	0.0383	0.0417	0.0557	0.0427	0.0403	0.0478	0.0471	0.0514	0.0487	0.0533	0.0553		490	0.0337	0.0377	0.0354	0.0364	0.0359	0.036	0.0374	0.0343	0.0376	0.0371	0.0351	0.038	0.037	0.0368	0.0418	0.0408	0.0453	0.0471	0.0493	0.0487	0.0534	0.053
	495	0.0344	0.0375	0.0369	0.0395	0.0396	0.0374	0.0379	0.0378	0.0393	0.0361	0.0372	0.038	0.0405	0.0405	0.0426	0.0575	0.0413	0.0401	0.0468	0.0449	0.0479	0.0441	0.047	0.0487		495	0.0355	0.0399	0.0366	0.0382	0.0373	0.0377	0.0392	0.0373	0.0393	0.0388	0.0364	0.0402	0.0392	0.0375	0.0425	0.0408	0.0443	0.0457	0.0457	0.0452	0.0475	0.0469
	500	0.0356	0.0374	0.0377	0.0388	0.0391	0.0385	0.0376	0.038	0.0404	0.0368	0.038	0.0383	0.0401	0.0401	0.0433	0.0573	0.0408	0.0402	0.0448	0.0425	0.0449	0.0408	0.0443	0.0449		500	0.0345	0.0405	0.0368	0.0403	0.038	0.0375	0.0388	0.0372	0.0397	0.0386	0.0377	0.0395	0.04	0.0378	0.0429	0.04	0.0434	0.0432	0.0423	0.0415	0.0441	0.0433
	505	0.0347	0.0368	0.0355	0.0382	0.0387	0.0372	0.0364	0.0383	0.0392	0.0364	0.0383	0.0366	0.0397	0.0397	0.0421	0.0553	0.0398	0.0384	0.0431	0.0404	0.0409	0.038	0.0402	0.0401		505	0.0348	0.0399	0.0363	0.0387	0.0378	0.0364	0.0383	0.037	0.0377	0.039	0.0362	0.0382	0.0392	0.037	0.0413	0.0392	0.0414	0.0408	0.0399	0.0383	0.0401	0.0394
	510	0.0333	0.0361	0.0347	0.0357	0.0372	0.0365	0.0365	0.0367	0.0374	0.0345	0.0366	0.035	0.0396	0.0396	0.0411	0.0544	0.0385	0.0373	0.0414	0.0382	0.0393	0.0352	0.0375	0.0372		510	0.0339	0.0376	0.0349	0.0363	0.0374	0.0353	0.0365	0.0358	0.0366	0.0376	0.0361	0.0381	0.0392	0.0364	0.0394	0.0375	0.0399	0.0384	0.0365	0.0356	0.0374	0.0372
	515	0.0342	0.0344	0.0349	0.0357	0.0356	0.0344	0.0339	0.0349	0.0366	0.035	0.035	0.0352	0.0376	0.0376	0.0396	0.0515	0.0369	0.0361	0.0396	0.0369	0.0355	0.0326	0.0344	0.035		515	0.0341	0.0383	0.0342	0.0354	0.0345	0.0348	0.0355	0.0335	0.0356	0.0358	0.0348	0.036	0.0361	0.0342	0.0379	0.0354	0.0377	0.035	0.0343	0.0338	0.0348	0.0333
	520	0.0343	0.0349	0.0348	0.0363	0.0371	0.0353	0.0362	0.036	0.0368	0.0353	0.0352	0.0375	0.0378	0.0378	0.0402	0.0524	0.0381	0.0355	0.0396	0.0367	0.0353	0.0341	0.0355	0.036		520	0.0341	0.0391	0.0352	0.0362	0.035	0.0347	0.0363	0.0341	0.0358	0.0363	0.0347	0.0368	0.0367	0.0353	0.0386	0.038	0.0381	0.0354	0.0351	0.0334	0.0352	0.0347
	525	0.0342	0.0357	0.0367	0.0368	0.037	0.0361	0.0357	0.0365	0.0394	0.0371	0.0375	0.0326	0.0396	0.0396	0.0429	0.0536	0.0397	0.0373	0.0411	0.0383	0.0372	0.0356	0.0359	0.0369		525	0.0345	0.0394	0.0352	0.0372	0.0374	0.0366	0.0374	0.0367	0.0374	0.0379	0.0364	0.0392	0.0387	0.0364	0.0411	0.0375	0.0396	0.0381	0.0361	0.0352	0.0368	0.0367
	530	0.0323	0.0321	0.0307	0.0326	0.0333	0.0321	0.0323	0.0329	0.034	0.0327	0.0326	0.0341	0.0336	0.0336	0.037	0.0487	0.0351	0.0321	0.0354	0.0339	0.0321	0.0304	0.0321	0.0321		530	0.0312	0.0351	0.032	0.0329	0.032	0.0313	0.033	0.0328	0.033	0.0328	0.0317	0.0333	0.0323	0.031	0.0356	0.034	0.0345	0.0321	0.0318	0.0298	0.0305	0.0301
	535	0.0339	0.0352	0.0342	0.035	0.0357	0.0341	0.0344	0.0346	0.0359	0.0347	0.0341	0.0371	0.0365	0.0365	0.0391	0.0512	0.0363	0.0348	0.0381	0.0352	0.0332	0.0322	0.0332	0.0344		535	0.0342	0.038	0.034	0.0362	0.034	0.034	0.0344	0.0341	0.0348	0.0358	0.0339	0.0361	0.0353	0.0331	0.0375	0.036	0.0364	0.0346	0.0331	0.0321	0.0333	0.0323
	540	0.034	0.0371	0.0364	0.0369	0.037	0.0357	0.0361	0.0354	0.0381	0.0354	0.0371	0.0348	0.0387	0.0387	0.0405	0.0525	0.0378	0.0373	0.0401	0.0368	0.0371	0.0334	0.0338	0.0353		540	0.0339	0.0383	0.0347	0.0366	0.0359	0.0365	0.036	0.0356	0.0365	0.0372	0.0349	0.0373	0.0379	0.0358	0.0397	0.037	0.0388	0.0358	0.0348	0.0336	0.035	0.0341
	545	0.0337	0.0346	0.0341	0.0344	0.0348	0.0337	0.0349	0.0339	0.0368	0.0341	0.0348	0.035	0.0372	0.0372	0.039	0.0512	0.0369	0.0345	0.0378	0.0358	0.0343	0.0326	0.0336	0.0336		545	0.0334	0.0377	0.0346	0.0345	0.0345	0.0338	0.0353	0.0339	0.0356	0.035	0.0341	0.0354	0.0362	0.0336	0.0382	0.036	0.0366	0.034	0.033	0.0315	0.033	0.0334
	550	0.0344	0.0358	0.0358	0.0359	0.036	0.035	0.0349	0.0353	0.0369	0.0353	0.035	0.0354	0.0375	0.0375	0.0396	0.0508	0.0376	0.0353	0.0384	0.0375	0.0352	0.0328	0.0337	0.0343		550	0.0344	0.0384	0.035	0.0359	0.0348	0.0344	0.0366	0.0343	0.0373	0.0362	0.0341	0.0358	0.0369	0.0341	0.0392	0.0369	0.0374	0.0347	0.0338	0.0322	0.0336	0.033
	555	0.0343	0.0365	0.0359	0.0362	0.037	0.0353	0.0341	0.0355	0.037	0.0352	0.0354	0.0356	0.0386	0.0386	0.0394	0.0515	0.037	0.0358	0.0391	0.0361	0.0355	0.0326	0.0341	0.0341		555	0.0338	0.0386	0.0344	0.0365	0.0363	0.0359	0.0359	0.0341	0.0362	0.0354	0.035	0.0375	0.0377	0.0347	0.0401	0.0368	0.0372	0.0342	0.0341	0.0327	0.0339	0.0336
	560	0.0352	0.0368	0.0346	0.0357	0.0357	0.0353	0.035	0.0355	0.0369	0.0354	0.0356	0.0354	0.0372	0.0372	0.0395	0.0518	0.0377	0.0359	0.0385	0.0359	0.0345	0.0324	0.034	0.0346		560	0.0339	0.0392	0.035	0.0368	0.036	0.0359	0.0359	0.0347	0.0359	0.0367	0.0349	0.0369	0.0371	0.0346	0.0377	0.0375	0.0374	0.0351	0.0342	0.0325	0.0342	0.0334
	565	0.0337	0.0354	0.0346	0.0362	0.0358	0.0343	0.0345	0.0348	0.0368	0.0353	0.0354	0.0353	0.038	0.038	0.04	0.0516	0.0385	0.0355	0.0391	0.0366	0.034	0.0327	0.0334	0.0343		565	0.0331	0.0379	0.0337	0.036	0.036	0.0348	0.0346	0.0348	0.0366	0.037	0.0347	0.0364	0.0374	0.0349	0.0392	0.0358	0.0372	0.0345	0.0332	0.0323	0.0335	0.0338
	570	0.0332	0.0363	0.0351	0.0354	0.0364	0.0347	0.0343	0.0338	0.0371	0.035	0.0353	0.0345	0.0377	0.0377	0.0393	0.0509	0.0377	0.0352	0.0384	0.0361	0.0353	0.0331	0.0341	0.0337		570	0.0331	0.037	0.0349	0.0358	0.0356	0.0358	0.0356	0.0354	0.036	0.0357	0.0352	0.0363	0.0375	0.0334	0.0388	0.0363	0.0381	0.0342	0.0337	0.0325	0.0343	0.034
	575	0.0341	0.0357	0.0338	0.0357	0.0365	0.0343	0.0347	0.035	0.0355	0.0344	0.0345	0.0353	0.0369	0.0369	0.0388	0.0503	0.0363	0.0348	0.0378	0.0363	0.0346	0.032	0.033	0.0345		575	0.0341	0.038	0.035	0.0344	0.0346	0.0344	0.0344	0.0348	0.0349	0.036	0.0338	0.0363	0.0355	0.0336	0.0384	0.036	0.0376	0.0338	0.0342	0.0322	0.0333	0.0333
	580	0.0354	0.0359	0.0353	0.0375	0.0368	0.0356	0.0348	0.0346	0.0365	0.0348	0.0353	0.0367	0.0375	0.0375	0.0381	0.0515	0.0363	0.0352	0.0364	0.0371	0.0344	0.0344	0.034	0.0349		580	0.0341	0.0386	0.035	0.0361	0.036	0.0347	0.0346	0.0356	0.0363	0.0354	0.0348	0.0356	0.0358	0.0333	0.0391	0.0369	0.0369	0.0347	0.0344	0.0327	0.0335	0.0332
	585	0.0355	0.0375	0.0368	0.0376	0.0376	0.0354	0.0358	0.0354	0.0391	0.0358	0.0367	0.0363	0.0373	0.0373	0.0396	0.0514	0.0374	0.0365	0.039	0.0358	0.0363	0.0332	0.0328	0.0357		585	0.0356	0.0402	0.0355	0.0368	0.0369	0.0372	0.0362	0.0365	0.037	0.0374	0.0351	0.0372	0.0372	0.0348	0.0404	0.0372	0.0392	0.0353	0.0356	0.0346	0.0364	0.0355
	590	0.0355	0.0367	0.036	0.0369	0.0367	0.0363	0.0361	0.0367	0.038	0.0356	0.0363	0.0361	0.0363	0.0363	0.0391	0.0524	0.0376	0.0359	0.0386	0.0352	0.0361	0.0347	0.0332	0.0357		590	0.0355	0.0393	0.0361	0.0372	0.0366	0.0362	0.0365	0.0366	0.0353	0.0369	0.0355	0.0376	0.0372	0.0342	0.0408	0.0392	0.039	0.0355	0.0348	0.0333	0.0344	0.0345
	595	0.0337	0.0358	0.0355	0.0365	0.0357	0.035	0.0349	0.0334	0.0375	0.0352	0.0361	0.0339	0.037	0.037	0.0387	0.0512	0.0375	0.0358	0.038	0.0355	0.0362	0.0334	0.0321	0.0352		595	0.035	0.0385	0.0349	0.0358	0.0353	0.0353	0.0355	0.0346	0.0343	0.0361	0.0344	0.0369	0.0372	0.0336	0.039	0.037	0.0378	0.0352	0.0337	0.034	0.0351	0.0342
	600	0.0341	0.0352	0.0344	0.0349	0.0352	0.0348	0.0356	0.0338	0.0374	0.0352	0.0339	0.0355	0.0368	0.0368	0.038	0.051	0.0363	0.0349	0.0373	0.0346	0.036	0.0327	0.032	0.034		600	0.0332	0.0378	0.0352	0.0336	0.035	0.0347	0.0348	0.0334	0.0345	0.0346	0.0353	0.034	0.0368	0.0333	0.0383	0.037	0.0367	0.0344	0.033	0.0322	0.0333	0.0331
	605	0.0349	0.0368	0.0349	0.0358	0.0363	0.0356	0.0354	0.0348	0.0375	0.0356	0.0355	0.0341	0.0365	0.0365	0.0387	0.0517	0.0367	0.0349	0.0375	0.0358	0.0364	0.0337	0.0332	0.0354		605	0.0342	0.0391	0.0361	0.035	0.0366	0.0365	0.0364	0.0348	0.035	0.0354	0.035	0.0357	0.0371	0.0332	0.039	0.0376	0.0375	0.0355	0.034	0.0339	0.0342	0.0344
	610	0.0342	0.0355	0.0333	0.0348	0.0346	0.0356	0.0355	0.0352	0.0361	0.0338	0.0341	0.0356	0.0352	0.0352	0.037	0.0507	0.0368	0.0336	0.0365	0.0344	0.0342	0.0331	0.0326	0.033		610	0.0335	0.038	0.0353	0.0352	0.0358	0.0346	0.0356	0.0335	0.0348	0.0341	0.0348	0.0346	0.036	0.0325	0.038	0.0366	0.037	0.0351	0.0339	0.0327	0.0335	0.0324
	615	0.0344	0.037	0.0347	0.0356	0.0358	0.0355	0.0361	0.0347	0.0374	0.0349	0.0356	0.035	0.0372	0.0372	0.0393	0.052	0.0374	0.0348	0.0372	0.0348	0.0362	0.034	0.0325	0.0345		615	0.0342	0.0388	0.0354	0.0361	0.0377	0.0364	0.0357	0.0343	0.0358	0.0352	0.0362	0.0364	0.0365	0.0335	0.0389	0.0371	0.0374	0.0362	0.0343	0.0335	0.0343	0.0334
	620	0.0348	0.0371	0.0353	0.0363	0.0361	0.0357	0.0353	0.0343	0.0369	0.0349	0.035	0.0352	0.0384	0.0384	0.0386	0.0512	0.0352	0.0345	0.0373	0.0341	0.0356	0.0337	0.0329	0.0348		620	0.0355	0.0393	0.0355	0.035	0.0367	0.0357	0.0353	0.0347	0.035	0.035	0.0348	0.0361	0.0364	0.0335	0.0389	0.0361	0.037	0.0355	0.0342	0.0348	0.0351	0.0347
	625	0.0336	0.036	0.0357	0.0354	0.035	0.0349	0.0345	0.0338	0.0378	0.0344	0.0352	0.0339	0.0372	0.0372	0.0379	0.0506	0.0353	0.0331	0.0374	0.0342	0.0359	0.0326	0.0322	0.035		625	0.0336	0.0381	0.0359	0.0347	0.0352	0.0358	0.035	0.0343	0.0346	0.0357	0.0338	0.0358	0.0368	0.0332	0.0392	0.0357	0.0365	0.0351	0.0338	0.0337	0.0342	0.0332
	630	0.0329	0.0345	0.0319	0.0339	0.0327	0.0328	0.0338	0.0334	0.0354	0.0325	0.0339	0.0342	0.0348	0.0348	0.0366	0.0493	0.0347	0.0332	0.0356	0.0327	0.0334	0.0328	0.0323	0.0319		630	0.0321	0.0366	0.0335	0.0338	0.0343	0.0337	0.0337	0.0333	0.032	0.0336	0.033	0.0345	0.0347	0.0313	0.0372	0.0348	0.0361	0.0348	0.0325	0.0318	0.0328	0.0325
	635	0.0328	0.0355	0.0341	0.0347	0.0341	0.0337	0.0343	0.0325	0.0364	0.033	0.0342	0.0348	0.0359	0.0359	0.0369	0.0501	0.0355	0.0326	0.0359	0.0342	0.0349	0.0332	0.0317	0.0341		635	0.0328	0.037	0.0343	0.0334	0.0343	0.0347	0.0338	0.0337	0.0339	0.0346	0.0338	0.0346	0.0356	0.0319	0.0372	0.0351	0.0361	0.034	0.0335	0.0337	0.0332	0.033
	640	0.0335	0.0357	0.0329	0.034	0.0341	0.0346	0.0349	0.0337	0.0362	0.0336	0.0348	0.0355	0.0356	0.0356	0.038	0.0503	0.0361	0.0344	0.0365	0.0343	0.0349	0.0329	0.0317	0.0331		640	0.0334	0.0378	0.0348	0.0338	0.0346	0.0339	0.035	0.0341	0.034	0.0339	0.034	0.0344	0.0359	0.0329	0.0376	0.0359	0.0359	0.0338	0.0343	0.0333	0.0329	0.0337
	645	0.0332	0.036	0.0344	0.0358	0.0345	0.0346	0.0353	0.0342	0.0364	0.0343	0.0355	0.0348	0.0356	0.0356	0.0376	0.0502	0.0351	0.0333	0.0372	0.0343	0.0345	0.0329	0.0322	0.034		645	0.0331	0.0382	0.0348	0.0333	0.0347	0.0335	0.0344	0.0338	0.0338	0.0353	0.0336	0.0352	0.0364	0.0328	0.0374	0.0363	0.0362	0.035	0.0343	0.034	0.0341	0.0337
	650	0.0342	0.0354	0.034	0.0354	0.0347	0.0337	0.0339	0.0336	0.0366	0.0338	0.0348	0.0337	0.0374	0.0374	0.0388	0.0505	0.0348	0.0331	0.0371	0.0337	0.0352	0.0334	0.0329	0.0342		650	0.0333	0.038	0.0351	0.0346	0.0369	0.034	0.0348	0.0346	0.0343	0.0348	0.0342	0.0359	0.0365	0.0329	0.0371	0.0364	0.0371	0.0351	0.0338	0.0341	0.0338	0.0347
	655	0.0317	0.0331	0.0331	0.0329	0.0328	0.0325	0.0325	0.0319	0.0339	0.0318	0.0337	0.0332	0.0345	0.0345	0.0372	0.0475	0.0334	0.032	0.0348	0.0327	0.0328	0.0315	0.0316	0.0318		655	0.0306	0.0364	0.0329	0.0313	0.0324	0.0321	0.0326	0.0318	0.0312	0.0325	0.032	0.0346	0.0344	0.0313	0.0357	0.0334	0.0351	0.0337	0.0323	0.0318	0.0323	0.0327
	660	0.0313	0.033	0.0311	0.0319	0.0316	0.0335	0.0327	0.032	0.0334	0.032	0.0332	0.0343	0.0334	0.0334	0.0357	0.0476	0.0344	0.0321	0.035	0.0324	0.0321	0.0306	0.0308	0.0323		660	0.031	0.0352	0.0326	0.0311	0.0333	0.0313	0.0324	0.0313	0.0315	0.032	0.0324	0.0339	0.0339	0.0317	0.0359	0.0322	0.0342	0.0335	0.032	0.0314	0.0318	0.0324
	665	0.0332	0.0346	0.0326	0.0342	0.0335	0.0343	0.0345	0.0343	0.0346	0.0333	0.0343	0.0329	0.035	0.035	0.0373	0.0492	0.0357	0.0336	0.0371	0.0341	0.0335	0.0324	0.0319	0.033		665	0.0328	0.0368	0.0335	0.0325	0.0354	0.0329	0.0346	0.0322	0.0324	0.0339	0.0338	0.0338	0.0359	0.0319	0.0374	0.0348	0.0364	0.0348	0.0327	0.0326	0.0328	0.033
	670	0.0327	0.0336	0.0327	0.0341	0.0347	0.0338	0.034	0.0326	0.0355	0.0332	0.0329	0.0336	0.0364	0.0364	0.0383	0.0492	0.0347	0.0336	0.0371	0.035	0.0337	0.0323	0.0317	0.0341		670	0.0317	0.0374	0.0333	0.0333	0.0349	0.0334	0.0341	0.0332	0.0329	0.033	0.0342	0.034	0.0354	0.0324	0.0373	0.0345	0.037	0.0338	0.033	0.033	0.0333	0.0345
	675	0.0311	0.0336	0.0313	0.0326	0.0328	0.032	0.0333	0.0323	0.0346	0.0329	0.0336	0.0336	0.0346	0.0346	0.0371	0.0496	0.0345	0.0331	0.0355	0.0332	0.0335	0.0319	0.0311	0.0332		675	0.0322	0.0353	0.0335	0.0323	0.0328	0.0318	0.033	0.0321	0.0332	0.0326	0.0324	0.0339	0.0349	0.0319	0.0361	0.0342	0.0365	0.0333	0.033	0.0323	0.0326	0.0324
	680	0.0314	0.0324	0.0308	0.0317	0.0329	0.0329	0.0337	0.0327	0.035	0.0326	0.0336	0.0348	0.0355	0.0355	0.0371	0.0484	0.0355	0.033	0.0359	0.0338	0.0345	0.0324	0.0317	0.0333		680	0.0319	0.0374	0.0324	0.0322	0.0336	0.0341	0.0326	0.0324	0.0317	0.0334	0.0334	0.0343	0.035	0.0329	0.0363	0.0345	0.0357	0.0345	0.0327	0.0329	0.0333	0.0337
	685	0.033	0.0334	0.0331	0.0334	0.0352	0.0344	0.0346	0.0332	0.0358	0.0344	0.0348	0.0345	0.0353	0.0353	0.0372	0.0496	0.0366	0.0348	0.0385	0.0337	0.0344	0.033	0.032	0.0333		685	0.0328	0.0358	0.0332	0.0333	0.0344	0.0332	0.0344	0.0325	0.0329	0.0339	0.0338	0.0355	0.0346	0.0337	0.0369	0.0361	0.0361	0.0348	0.034	0.0327	0.0334	0.0331
	690	0.0308	0.0335	0.0325	0.0327	0.0338	0.0341	0.033	0.0326	0.0345	0.0342	0.0345	0.034	0.0357	0.0357	0.039	0.0484	0.0349	0.034	0.037	0.0332	0.0334	0.0323	0.0328	0.0339		690	0.0313	0.0357	0.0333	0.0313	0.0353	0.0325	0.0334	0.0337	0.0332	0.0345	0.0346	0.0344	0.0359	0.0325	0.0364	0.0346	0.0355	0.0351	0.0329	0.0332	0.0338	0.0336
	695	0.033	0.0333	0.0314	0.0323	0.0346	0.034	0.0338	0.0327	0.0342	0.0349	0.034	0.0313	0.0364	0.0364	0.0381	0.0498	0.0352	0.0319	0.0382	0.0346	0.0346	0.0331	0.032	0.0336		695	0.0314	0.0358	0.034	0.0334	0.0345	0.0329	0.0334	0.0326	0.0332	0.0354	0.0348	0.0348	0.0353	0.0334	0.0366	0.0355	0.0367	0.0347	0.0336	0.0331	0.0337	0.0339
	700	0.0311	0.0321	0.0289	0.031	0.0328	0.0315	0.0326	0.0315	0.0318	0.0313	0.0313	0.0331	0.0315	0.0315	0.0342	0.0479	0.0334	0.0324	0.0343	0.0327	0.0321	0.0307	0.0306	0.0332		700	0.0305	0.0341	0.0319	0.0303	0.0317	0.0317	0.033	0.0311	0.0304	0.0317	0.0323	0.0331	0.032	0.0314	0.0354	0.0335	0.0333	0.0332	0.0304	0.0313	0.0324	0.0325
	705	0.0327	0.0328	0.0296	0.0321	0.0328	0.0327	0.0332	0.0327	0.0339	0.0311	0.0331	0.035	0.0326	0.0326	0.0353	0.0491	0.0336	0.0328	0.0348	0.034	0.032	0.0322	0.031	0.0321		705	0.0317	0.0353	0.0333	0.0319	0.0331	0.0317	0.0335	0.0316	0.032	0.0314	0.0318	0.0324	0.0339	0.0313	0.0355	0.0345	0.0348	0.0337	0.0317	0.0317	0.0324	0.0326
	710	0.0322	0.0339	0.0317	0.033	0.0343	0.0344	0.0341	0.0334	0.0353	0.0343	0.035	0.0371	0.0363	0.0363	0.0371	0.049	0.0357	0.0342	0.0376	0.0339	0.035	0.0325	0.0332	0.0337		710	0.0314	0.0369	0.0346	0.034	0.0356	0.0331	0.0344	0.0332	0.033	0.035	0.0343	0.0351	0.0362	0.033	0.0372	0.0355	0.036	0.035	0.0338	0.0331	0.0343	0.0341
	715	0.0337	0.0354	0.0344	0.0352	0.0383	0.0372	0.0362	0.036	0.0366	0.0367	0.0371	0.0365	0.0382	0.0382	0.0389	0.0504	0.0372	0.0362	0.0392	0.0359	0.0369	0.0348	0.0336	0.0356		715	0.0326	0.0374	0.0354	0.0352	0.0375	0.0357	0.0358	0.0356	0.0357	0.0373	0.0375	0.0378	0.0385	0.036	0.0391	0.0376	0.0389	0.0374	0.0362	0.0356	0.0361	0.0363
	720	0.0338	0.0363	0.0337	0.0347	0.036	0.0368	0.0358	0.035	0.0385	0.0354	0.0365	0.0366	0.037	0.037	0.0386	0.0511	0.0371	0.0347	0.0386	0.0365	0.0366	0.0345	0.0344	0.0354		720	0.0339	0.038	0.0362	0.0347	0.0364	0.0357	0.0368	0.0362	0.0341	0.0375	0.036	0.0371	0.0382	0.0357	0.0383	0.0374	0.0383	0.0371	0.0348	0.0353	0.0369	0.0358
	725	0.0342	0.0362	0.0348	0.0355	0.0368	0.0377	0.0354	0.0357	0.0361	0.0369	0.0366	0.0379	0.0378	0.0378	0.0391	0.0519	0.0374	0.0361	0.039	0.0356	0.0363	0.0356	0.0347	0.0361		725	0.0345	0.039	0.0354	0.0356	0.0377	0.0356	0.0371	0.0368	0.0357	0.037	0.0372	0.0364	0.038	0.0358	0.0397	0.0373	0.0388	0.0368	0.0358	0.0361	0.0367	0.0361
	730	0.0359	0.0362	0.0353	0.0365	0.038	0.0387	0.0384	0.0361	0.0374	0.0385	0.0379	0.037	0.039	0.039	0.0406	0.0536	0.0403	0.0377	0.0415	0.0385	0.038	0.0369	0.0362	0.0379		730	0.0367	0.04	0.0378	0.0367	0.0389	0.0364	0.0375	0.0364	0.0358	0.0386	0.037	0.0388	0.0382	0.0365	0.0408	0.0405	0.0394	0.0387	0.0373	0.0373	0.0383	0.0373
	735	0.0368	0.0369	0.0358	0.0362	0.038	0.0378	0.0389	0.0371	0.0372	0.0385	0.037	0.0392	0.0384	0.0384	0.0417	0.0553	0.0401	0.0383	0.0404	0.0382	0.0392	0.0375	0.0362	0.039		735	0.0362	0.04	0.0383	0.0363	0.0393	0.0371	0.0379	0.0362	0.0366	0.0381	0.0378	0.0387	0.0397	0.0375	0.0413	0.0402	0.0398	0.0396	0.0384	0.0385	0.0384	0.0383
	740	0.0382	0.0375	0.0363	0.0371	0.0383	0.0393	0.0402	0.0382	0.0387	0.0393	0.0392	0.0403	0.0397	0.0397	0.0429	0.0557	0.0405	0.0396	0.0421	0.04	0.0404	0.038	0.0377	0.0387		740	0.0383	0.042	0.0395	0.0375	0.04	0.0382	0.0392	0.0381	0.0382	0.0392	0.0387	0.0406	0.0402	0.0383	0.0414	0.0414	0.0424	0.0407	0.0395	0.0393	0.0388	0.0397
	745	0.0392	0.0391	0.037	0.0391	0.0401	0.0407	0.0403	0.0393	0.041	0.04	0.0403	0.0407	0.0411	0.0411	0.0439	0.0563	0.0407	0.0406	0.0433	0.0415	0.0405	0.039	0.0384	0.0405		745	0.0398	0.0439	0.04	0.0384	0.0412	0.0398	0.0405	0.0384	0.0378	0.0405	0.041	0.0416	0.0421	0.0412	0.0423	0.0412	0.0431	0.0415	0.0395	0.0402	0.0406	0.0405
	750	0.0387	0.0391	0.0372	0.0397	0.0411	0.0413	0.0411	0.0394	0.0401	0.0401	0.0407	0.041	0.0407	0.0407	0.0435	0.0568	0.0419	0.0408	0.0435	0.0407	0.0405	0.04	0.0393	0.0408		750	0.0392	0.0431	0.0405	0.0396	0.0414	0.0395	0.0407	0.0392	0.0386	0.0412	0.0414	0.041	0.0429	0.0399	0.0428	0.0421	0.0437	0.0412	0.0403	0.0402	0.0403	0.0418
	755	0.0375	0.0387	0.0371	0.0388	0.0396	0.0405	0.0409	0.0388	0.0387	0.0399	0.041	0.0416	0.0415	0.0415	0.0426	0.056	0.0416	0.04	0.0426	0.0401	0.0398	0.0401	0.0374	0.041		755	0.0388	0.0422	0.0396	0.0386	0.0404	0.0393	0.0411	0.0393	0.0375	0.0406	0.0401	0.0413	0.0414	0.0392	0.0427	0.0429	0.0423	0.0412	0.0401	0.0398	0.0407	0.0413
	760	0.0387	0.0402	0.0384	0.0402	0.041	0.0416	0.0419	0.0407	0.0399	0.041	0.0416	0.0392	0.0409	0.0409	0.0437	0.0574	0.043	0.0411	0.044	0.0413	0.0412	0.04	0.04	0.0413		760	0.04	0.0436	0.041	0.0397	0.0414	0.0404	0.0411	0.0403	0.0386	0.0416	0.0413	0.0422	0.043	0.0411	0.0448	0.0437	0.043	0.0428	0.0423	0.0415	0.0411	0.0425
	765	0.0378	0.0383	0.0362	0.0384	0.0396	0.0416	0.0405	0.0384	0.0381	0.0401	0.0392	0.0389	0.0407	0.0407	0.0425	0.0569	0.0412	0.0399	0.0427	0.0397	0.0413	0.0391	0.037	0.0408		765	0.0385	0.0423	0.0398	0.0381	0.0401	0.0389	0.0392	0.0385	0.0381	0.0408	0.0404	0.0413	0.0421	0.0397	0.0423	0.0409	0.0418	0.041	0.0396	0.0399	0.0407	0.0403
	770	0.0389	0.0383	0.0364	0.038	0.0395	0.0391	0.0391	0.0387	0.0377	0.0394	0.0389	0.0403	0.0402	0.0402	0.0411	0.0559	0.041	0.0398	0.0411	0.0403	0.0395	0.0376	0.0365	0.0407		770	0.038	0.0409	0.0391	0.0385	0.0385	0.0386	0.0394	0.0382	0.0373	0.0406	0.0383	0.0407	0.0402	0.0401	0.0413	0.0415	0.0427	0.0398	0.0393	0.0392	0.0392	0.0398
	775	0.0374	0.0395	0.0369	0.0387	0.0404	0.0406	0.0402	0.0389	0.0397	0.0411	0.0403	0.0385	0.0424	0.0424	0.0425	0.0566	0.0413	0.0411	0.0423	0.0421	0.0411	0.0399	0.0382	0.0425		775	0.0388	0.0425	0.0405	0.0385	0.0405	0.0395	0.0414	0.0391	0.0376	0.0413	0.0401	0.0419	0.0429	0.0415	0.0424	0.042	0.0419	0.0413	0.0409	0.0411	0.0407	0.0412
	780	0.0358	0.0382	0.0363	0.0381	0.0382	0.0384	0.0403	0.0385	0.0382	0.0394	0.0385	0.0399	0.0398	0.0398	0.0412	0.0544	0.0409	0.0413	0.0403	0.0394	0.0398	0.0382	0.037	0.0407		780	0.0382	0.0408	0.0374	0.0386	0.0392	0.0377	0.04	0.0378	0.0373	0.0399	0.0383	0.0407	0.0413	0.0393	0.0413	0.0402	0.041	0.0403	0.04	0.0396	0.0397	0.0416
	785	0.037	0.0388	0.0365	0.0383	0.0397	0.0399	0.0409	0.0397	0.0388	0.04	0.0399	0.0394	0.0408	0.0408	0.0432	0.0567	0.0414	0.0412	0.0424	0.0403	0.0412	0.0399	0.0379	0.0409		785	0.0373	0.0419	0.0397	0.0389	0.0404	0.0397	0.0405	0.0392	0.0383	0.0416	0.0391	0.0409	0.0414	0.0409	0.0422	0.0415	0.0411	0.0409	0.0393	0.0409	0.0401	0.041
	790	0.0367	0.0383	0.0354	0.0369	0.0389	0.039	0.0396	0.0372	0.0372	0.0382	0.0394	0.0391	0.0391	0.0391	0.0402	0.0559	0.0415	0.039	0.0399	0.0393	0.0396	0.0388	0.0361	0.0392		790	0.0377	0.041	0.0385	0.0377	0.0395	0.0372	0.0389	0.0378	0.0363	0.0404	0.0383	0.0395	0.0408	0.0394	0.0411	0.04	0.0405	0.0393	0.0389	0.0393	0.0394	0.0394
	795	0.0353	0.0369	0.0358	0.037	0.0385	0.039	0.0395	0.0375	0.0377	0.0393	0.0391	0.0392	0.039	0.039	0.0405	0.0554	0.0418	0.0399	0.0415	0.038	0.0392	0.0384	0.0365	0.04		795	0.0369	0.0416	0.0378	0.0369	0.0395	0.037	0.0395	0.0385	0.0364	0.0404	0.0386	0.0399	0.0402	0.0396	0.0407	0.0402	0.0408	0.0405	0.0396	0.039	0.0394	0.0396
	800	0.0365	0.0371	0.0347	0.0366	0.039	0.039	0.04	0.0375	0.0366	0.0393	0.0392	0.0387	0.0406	0.0406	0.0396	0.0547	0.0406	0.0406	0.0412	0.0388	0.0399	0.0391	0.0366	0.0396		800	0.0378	0.0409	0.0381	0.0371	0.042	0.0384	0.0392	0.0377	0.037	0.0399	0.0398	0.04	0.0405	0.0395	0.0412	0.0409	0.0414	0.0415	0.0401	0.0398	0.0397	0.0402
[truncated: 27 more columns]

## Sheet: Figure S1_4_5_mM
	Aluminum Chelation, Run 1																										Aluminum Chelation, Run 2
	Blank = 295 μL Water + 5 μL DMSO																										Blank = 295 μL Water + 5 μL DMSO
	[Al3+] (µM)	Blank	0	0.00762939	0.0152588	0.0305176	0.0610352	0.12207	0.244141	0.488281	0.976562	1.95312	3.90625	7.8125	15.625	31.25	62.5	125	250	500	1000	2000	4000	8000	16000		[Al3+] (µM)	Blank	0	0.00762939	0.0152588	0.0305176	0.0610352	0.12207	0.244141	0.488281	0.976562	1.95312	3.90625	7.8125	15.625	31.25	62.5	125	250	500	1000	2000	4000
	Wavelength (nm)	Absorbance																									Wavelength (nm)	Absorbance
	300	0.3983	1.0046	1.0407	1.0385	1.0233	1.0294	1.0285	1.0428	1.0452	1.0315	1.0111	1.0165	1.0198	1.0233	1.0395	1.0241	1.0145	1.0168	1.0012	1.0153	0.9859	0.9615	0.9525	0.9293		300	0.3983	1.0046	1.0308	1.0221	1.0588	1.0476	1.0644	1.0449	1.053	1.0344	1.0677	1.0304	1.0102	1.0333	1.0328	1.0139	1.0185	1.005	1.0231	0.9839	0.9879	0.9677
	305	0.2843	0.9115	0.9429	0.9413	0.9279	0.9331	0.9313	0.9415	0.9459	0.9321	0.9164	0.9225	0.9201	0.9202	0.9314	0.9129	0.8964	0.8846	0.8625	0.8603	0.8323	0.8066	0.797	0.7725		305	0.2843	0.9115	0.9343	0.9249	0.9533	0.9439	0.9592	0.9436	0.9509	0.9346	0.9644	0.9349	0.9147	0.9384	0.9238	0.9026	0.8954	0.8739	0.8765	0.8353	0.8347	0.8124
	310	0.2313	0.8855	0.9121	0.9134	0.8994	0.9039	0.9042	0.9113	0.9166	0.9016	0.8884	0.8941	0.8869	0.8829	0.889	0.8587	0.8333	0.8049	0.7707	0.7538	0.7151	0.686	0.6705	0.646		310	0.2313	0.8855	0.9047	0.8945	0.9212	0.9128	0.9262	0.9119	0.9179	0.9035	0.9312	0.9057	0.8837	0.9049	0.8808	0.8517	0.8289	0.7939	0.7807	0.7301	0.7167	0.6879
	315	0.2116	0.8935	0.9224	0.9214	0.9088	0.9117	0.9132	0.9183	0.9254	0.9095	0.8983	0.9018	0.8925	0.8859	0.887	0.8509	0.8181	0.7803	0.7383	0.7119	0.6686	0.6346	0.6159	0.588		315	0.2116	0.8935	0.9132	0.9022	0.9284	0.918	0.9323	0.9196	0.9248	0.911	0.9384	0.9131	0.8901	0.9086	0.8786	0.8426	0.8112	0.7678	0.7452	0.6862	0.6683	0.6337
	320	0.1948	0.9211	0.9493	0.9491	0.9359	0.9398	0.9401	0.9455	0.9541	0.9379	0.9265	0.9284	0.9173	0.9071	0.9087	0.8648	0.8276	0.784	0.7372	0.7063	0.6594	0.6229	0.6029	0.5727		320	0.1948	0.9211	0.9398	0.9291	0.9548	0.9449	0.9597	0.9478	0.9511	0.9373	0.9641	0.9404	0.9157	0.9337	0.8967	0.8563	0.8192	0.7703	0.7428	0.6801	0.6596	0.6211
	325	0.1805	0.9709	0.9991	1.001	0.986	0.9895	0.9896	0.9937	1.0045	0.9859	0.977	0.9779	0.9641	0.9538	0.9531	0.9037	0.8653	0.8159	0.7663	0.7311	0.6807	0.6429	0.6192	0.5872		325	0.1805	0.9709	0.9894	0.9775	1.0032	0.9935	1.0078	0.9974	1.0006	0.9856	1.0136	0.9903	0.9634	0.9807	0.9405	0.8969	0.8548	0.8022	0.772	0.7054	0.6841	0.6426
	330	0.1702	1.0221	1.0518	1.054	1.0378	1.0416	1.0426	1.0463	1.0585	1.039	1.0313	1.0311	1.0147	1.0035	1.0049	0.9514	0.9119	0.858	0.8061	0.7673	0.7143	0.6728	0.6456	0.6089		330	0.1702	1.0221	1.041	1.0289	1.0553	1.0453	1.0605	1.0494	1.0526	1.0381	1.0645	1.0442	1.0152	1.0354	0.9891	0.9437	0.8985	0.8444	0.8111	0.7411	0.7179	0.6701
	335	0.1578	1.0892	1.1176	1.1229	1.1048	1.1081	1.11	1.1117	1.1258	1.1033	1.0975	1.0966	1.0797	1.0685	1.0699	1.0117	0.9734	0.9166	0.8629	0.8181	0.7593	0.713	0.6795	0.6357		335	0.1578	1.0892	1.1083	1.0927	1.1216	1.1108	1.1261	1.1173	1.1198	1.1037	1.1307	1.1107	1.0805	1.1014	1.0539	1.0067	0.9585	0.9027	0.8666	0.7925	0.7674	0.7114
	340	0.1489	1.1457	1.1749	1.1804	1.1621	1.1657	1.1672	1.1687	1.1844	1.1605	1.1558	1.1549	1.1363	1.1247	1.1275	1.0662	1.0297	0.9699	0.914	0.8641	0.801	0.7494	0.7118	0.6599		340	0.1489	1.1457	1.1654	1.1485	1.1781	1.1688	1.1836	1.1754	1.1762	1.1603	1.1874	1.1692	1.1383	1.1589	1.1094	1.0614	1.0121	0.9549	0.919	0.8394	0.8121	0.7491
	345	0.1405	1.1988	1.2277	1.2332	1.2157	1.2179	1.2203	1.221	1.2384	1.2121	1.2085	1.2085	1.1885	1.1776	1.1809	1.1169	1.0825	1.02	0.964	0.9119	0.8452	0.7873	0.7441	0.686		345	0.1405	1.1988	1.219	1.2003	1.2324	1.2215	1.2367	1.23	1.2296	1.2128	1.2406	1.2229	1.1899	1.2128	1.1626	1.1138	1.0637	1.0062	0.9694	0.8863	0.8571	0.7874
	350	0.1334	1.233	1.2622	1.268	1.2495	1.2519	1.2547	1.2542	1.2736	1.2467	1.2424	1.2421	1.2223	1.2107	1.2155	1.15	1.1195	1.0563	1.0019	0.9486	0.8792	0.8195	0.7732	0.711		350	0.1334	1.233	1.2533	1.2343	1.2661	1.2557	1.2706	1.2634	1.2636	1.2476	1.2751	1.2588	1.2238	1.2479	1.1977	1.1488	1.0992	1.0427	1.0066	0.9228	0.8935	0.8188
	355	0.1244	1.2424	1.267	1.2748	1.2556	1.2579	1.2598	1.2605	1.2792	1.2502	1.2468	1.249	1.2294	1.2194	1.2251	1.1599	1.1355	1.075	1.0254	0.9744	0.9056	0.8467	0.8005	0.7366		355	0.1244	1.2424	1.2606	1.2391	1.2727	1.2615	1.2789	1.2703	1.2713	1.2543	1.2823	1.2652	1.2311	1.2547	1.208	1.1628	1.1163	1.0638	1.0308	0.9481	0.9219	0.8476
	360	0.1109	1.2073	1.2278	1.2331	1.2155	1.2184	1.2212	1.2213	1.2391	1.2135	1.207	1.2112	1.1939	1.1847	1.1938	1.1346	1.1177	1.0658	1.022	0.9784	0.9143	0.8595	0.8171	0.7551		360	0.1109	1.2073	1.2245	1.2036	1.2338	1.2231	1.2389	1.2325	1.2315	1.2161	1.2428	1.2265	1.1949	1.2226	1.1791	1.1393	1.0992	1.0545	1.0291	0.9528	0.9329	0.8604
	365	0.0921	1.1316	1.1494	1.1541	1.1367	1.1413	1.1434	1.1438	1.1624	1.1365	1.129	1.1362	1.1202	1.114	1.1298	1.0784	1.0721	1.0302	0.9994	0.9629	0.9082	0.8599	0.8222	0.765		365	0.0921	1.1316	1.147	1.1267	1.1551	1.1446	1.1608	1.1536	1.1522	1.1395	1.1651	1.1506	1.1234	1.1529	1.1136	1.0828	1.053	1.0207	1.0034	0.9388	0.9269	0.8601
	370	0.0684	1.0144	1.0274	1.029	1.0135	1.0191	1.0189	1.0211	1.0393	1.0165	1.0064	1.0189	1.0065	1.0046	1.028	0.9885	0.9993	0.9732	0.9602	0.9373	0.8948	0.8571	0.8286	0.7766		370	0.0684	1.0144	1.027	1.0081	1.0327	1.0227	1.0387	1.0326	1.0303	1.0192	1.0418	1.0315	1.0084	1.0437	1.0149	0.9973	0.9822	0.9662	0.9653	0.9167	0.9162	0.8582
	375	0.0485	0.8586	0.8673	0.8676	0.8544	0.8577	0.8584	0.8608	0.8758	0.857	0.8448	0.8631	0.8572	0.863	0.8957	0.8785	0.9094	0.9077	0.9193	0.916	0.8915	0.8686	0.852	0.8069		375	0.0485	0.8586	0.868	0.8495	0.8705	0.8609	0.8754	0.8707	0.8688	0.8607	0.8839	0.8727	0.8586	0.8955	0.8842	0.8852	0.8944	0.904	0.924	0.898	0.9148	0.8705
	380	0.0392	0.7006	0.7085	0.708	0.6961	0.6996	0.7	0.703	0.7133	0.6989	0.6863	0.7068	0.7081	0.7213	0.7642	0.7718	0.8297	0.8523	0.8915	0.911	0.9063	0.899	0.8952	0.8607		380	0.0392	0.7006	0.7054	0.6932	0.7093	0.7026	0.7162	0.709	0.7066	0.7059	0.7258	0.7162	0.7104	0.7541	0.7536	0.7782	0.8147	0.8519	0.8982	0.8959	0.9333	0.9023
	385	0.0372	0.5606	0.5655	0.5614	0.5543	0.5573	0.5561	0.5633	0.569	0.5594	0.5446	0.5687	0.5769	0.5973	0.6485	0.6792	0.7577	0.8088	0.8739	0.918	0.9325	0.9409	0.9508	0.9247		385	0.0372	0.5606	0.5635	0.5535	0.5671	0.5618	0.5744	0.5653	0.5659	0.5642	0.5854	0.5762	0.5759	0.6272	0.6413	0.6863	0.748	0.8128	0.8843	0.9057	0.9633	0.9471
	390	0.0372	0.4268	0.43	0.4247	0.4206	0.4218	0.4234	0.4302	0.4316	0.4255	0.4088	0.4382	0.4517	0.4766	0.5373	0.5879	0.6894	0.7645	0.8554	0.9233	0.9587	0.9852	1.0115	0.9959		390	0.0372	0.4268	0.4282	0.4206	0.4304	0.4267	0.4385	0.429	0.4293	0.4303	0.4517	0.4449	0.4503	0.5049	0.5318	0.5958	0.681	0.7718	0.8687	0.9158	0.994	0.9946
	395	0.0381	0.3092	0.3128	0.3061	0.3032	0.3058	0.3038	0.3127	0.3125	0.3095	0.291	0.3204	0.3399	0.3708	0.4357	0.5058	0.6227	0.719	0.8333	0.9235	0.9795	1.0254	1.0694	1.0678		395	0.0381	0.3092	0.3081	0.306	0.3101	0.307	0.3185	0.3106	0.3109	0.313	0.3344	0.3271	0.3381	0.3961	0.4334	0.5127	0.6163	0.7297	0.8496	0.9184	1.0185	1.0377
	400	0.0385	0.2205	0.2244	0.2163	0.2147	0.217	0.215	0.2247	0.2208	0.2227	0.2035	0.2342	0.2552	0.2896	0.3569	0.4369	0.563	0.6731	0.8024	0.9093	0.9847	1.0498	1.1129	1.1267		400	0.0385	0.2205	0.2186	0.2179	0.2205	0.2188	0.2285	0.2213	0.2198	0.2269	0.2454	0.2395	0.2537	0.3138	0.3561	0.4437	0.5592	0.6871	0.8217	0.9102	1.0272	1.0649
	405	0.0369	0.151	0.1544	0.1472	0.1451	0.1463	0.1453	0.155	0.1517	0.1536	0.1355	0.1632	0.1859	0.2223	0.2896	0.3734	0.5029	0.6197	0.7587	0.8783	0.9712	1.0551	1.1382	1.172		405	0.0369	0.151	0.1498	0.1491	0.1504	0.1493	0.1579	0.1499	0.1499	0.1562	0.1769	0.1685	0.1847	0.2452	0.2894	0.3805	0.4997	0.6355	0.7788	0.8825	1.0149	1.073
	410	0.0378	0.1115	0.1162	0.1079	0.1069	0.1077	0.107	0.1174	0.1108	0.1147	0.0982	0.125	0.1459	0.183	0.2468	0.3296	0.4558	0.573	0.7133	0.8402	0.9467	1.0446	1.1448	1.194		410	0.0378	0.1115	0.1093	0.1109	0.1111	0.1107	0.1189	0.1102	0.1104	0.1166	0.1375	0.1296	0.1458	0.2051	0.2457	0.3336	0.4519	0.5875	0.733	0.8453	0.9887	1.0616
	415	0.0379	0.0823	0.0868	0.0794	0.0777	0.0788	0.079	0.0888	0.0813	0.0855	0.071	0.0953	0.1136	0.1478	0.2058	0.2848	0.3984	0.5119	0.6503	0.7804	0.8951	1.0098	1.126	1.1955		415	0.0379	0.0823	0.0808	0.0821	0.0804	0.0805	0.0877	0.0823	0.0814	0.0888	0.1082	0.0977	0.1147	0.1699	0.2057	0.287	0.3987	0.527	0.6683	0.7847	0.9373	1.0265
	420	0.0342	0.0637	0.0668	0.0587	0.0586	0.059	0.0575	0.068	0.0597	0.0636	0.0531	0.0727	0.0886	0.1194	0.1693	0.2384	0.3384	0.4423	0.5709	0.7018	0.8224	0.9471	1.0783	1.1645		420	0.0342	0.0637	0.0592	0.0633	0.0604	0.0601	0.0686	0.0605	0.0602	0.0685	0.0867	0.0753	0.0897	0.141	0.167	0.2414	0.3391	0.4553	0.5889	0.7061	0.8608	0.9646
	425	0.0356	0.0541	0.0586	0.051	0.0513	0.0513	0.0513	0.0601	0.0518	0.0559	0.0459	0.0624	0.076	0.1033	0.1453	0.2067	0.294	0.3864	0.507	0.633	0.7543	0.8833	1.0227	1.1217		425	0.0356	0.0541	0.0515	0.055	0.052	0.0516	0.0592	0.0516	0.052	0.0589	0.0776	0.0652	0.0778	0.1254	0.144	0.2063	0.2924	0.397	0.5211	0.6367	0.7895	0.9005
	430	0.0359	0.0488	0.0547	0.047	0.0462	0.047	0.0459	0.0562	0.0472	0.0515	0.0425	0.0572	0.0687	0.0904	0.1263	0.1787	0.253	0.3351	0.4439	0.565	0.685	0.8158	0.9574	1.0624		430	0.0359	0.0488	0.0479	0.0508	0.0475	0.0469	0.0556	0.049	0.048	0.0542	0.0731	0.0586	0.0694	0.1134	0.1253	0.1781	0.2536	0.3456	0.458	0.5686	0.7166	0.83
	435	0.0354	0.0465	0.0503	0.0423	0.0412	0.0434	0.0415	0.0509	0.0421	0.0465	0.0394	0.0496	0.0594	0.0764	0.1058	0.1471	0.2071	0.277	0.3729	0.483	0.5984	0.7242	0.863	0.969		435	0.0354	0.0465	0.044	0.0462	0.0428	0.0433	0.0514	0.0449	0.0435	0.0493	0.0681	0.0521	0.061	0.0999	0.1048	0.1476	0.208	0.2876	0.3859	0.4882	0.6256	0.7392
	440	0.035	0.0429	0.0477	0.0395	0.0392	0.0403	0.0389	0.0493	0.04	0.0435	0.0372	0.0465	0.0536	0.0658	0.0883	0.1218	0.1693	0.2266	0.3077	0.4058	0.509	0.6261	0.7561	0.855		440	0.035	0.0429	0.0403	0.0428	0.04	0.0398	0.0466	0.0415	0.0402	0.0456	0.0644	0.0468	0.0539	0.0871	0.0866	0.1196	0.1693	0.2347	0.3174	0.409	0.5317	0.6375
	445	0.0347	0.0416	0.0465	0.0384	0.0379	0.0385	0.0376	0.0485	0.0384	0.0422	0.0368	0.0436	0.0481	0.0582	0.077	0.1031	0.1384	0.1851	0.2529	0.338	0.4271	0.5312	0.6476	0.7368		445	0.0347	0.0416	0.0391	0.0418	0.0387	0.0381	0.0469	0.0389	0.0398	0.0437	0.0615	0.044	0.0494	0.082	0.0741	0.0995	0.1389	0.1919	0.2618	0.3398	0.4455	0.54
	450	0.0349	0.0389	0.0465	0.0378	0.0389	0.0377	0.0379	0.0479	0.0383	0.0408	0.0363	0.0403	0.0441	0.0525	0.0666	0.0889	0.1138	0.1522	0.2066	0.2773	0.3515	0.4393	0.5383	0.6152		450	0.0349	0.0389	0.0385	0.0415	0.0375	0.0376	0.0458	0.0374	0.038	0.0425	0.0595	0.0425	0.046	0.0762	0.0641	0.082	0.1135	0.1556	0.2123	0.277	0.3659	0.4469
	455	0.0349	0.0388	0.0456	0.0375	0.0378	0.038	0.0382	0.0471	0.0381	0.0401	0.0367	0.0393	0.0427	0.0484	0.0593	0.0766	0.0944	0.1235	0.1664	0.2229	0.2823	0.3533	0.4335	0.4941		455	0.0349	0.0388	0.0384	0.0407	0.0372	0.0372	0.0454	0.0372	0.0375	0.0421	0.0592	0.0406	0.0432	0.0725	0.0561	0.0702	0.0942	0.1266	0.1708	0.223	0.2922	0.3589
	460	0.0341	0.0388	0.0448	0.0368	0.0354	0.0369	0.036	0.0455	0.0368	0.0386	0.0356	0.0378	0.0393	0.0439	0.0524	0.0651	0.0763	0.0979	0.1292	0.1701	0.2137	0.2678	0.3274	0.3729		460	0.0341	0.0388	0.0365	0.0401	0.0366	0.0362	0.0443	0.0362	0.036	0.0404	0.057	0.0381	0.0406	0.0683	0.0499	0.0598	0.0775	0.1011	0.1324	0.1714	0.2217	0.2724
	465	0.0345	0.0391	0.045	0.0358	0.0349	0.0363	0.0359	0.0454	0.0353	0.0386	0.0352	0.0372	0.0378	0.0425	0.0488	0.0596	0.0647	0.0801	0.1028	0.1352	0.1664	0.2076	0.2523	0.286		465	0.0345	0.0391	0.0359	0.0379	0.0367	0.0365	0.0439	0.0368	0.0354	0.0403	0.0572	0.0378	0.0394	0.0665	0.0452	0.0538	0.0663	0.0839	0.1067	0.1346	0.1728	0.2111
	470	0.0348	0.0397	0.0435	0.0353	0.0331	0.0345	0.0352	0.0444	0.0356	0.0375	0.0354	0.0364	0.0369	0.0399	0.0437	0.0513	0.0548	0.0651	0.0806	0.1037	0.1242	0.1557	0.1868	0.2089		470	0.0348	0.0397	0.0344	0.0366	0.0358	0.0351	0.0426	0.0364	0.0346	0.04	0.0558	0.0364	0.0384	0.064	0.042	0.0478	0.0566	0.0716	0.0845	0.104	0.1305	0.1582
	475	0.0339	0.038	0.0427	0.0348	0.0337	0.0333	0.0347	0.045	0.0352	0.0366	0.0347	0.0351	0.036	0.0394	0.0418	0.0485	0.0474	0.0543	0.0654	0.0806	0.0951	0.1154	0.1372	0.1524		475	0.0339	0.038	0.0347	0.0367	0.0348	0.0342	0.0418	0.0363	0.035	0.0389	0.0543	0.0355	0.0375	0.0626	0.0393	0.0428	0.0492	0.0584	0.0671	0.0811	0.0978	0.1175
	480	0.0342	0.0377	0.0429	0.0352	0.0333	0.0332	0.0349	0.0449	0.0355	0.036	0.0346	0.0356	0.036	0.0385	0.0419	0.0469	0.0428	0.048	0.0543	0.065	0.0738	0.0878	0.1014	0.1107		480	0.0342	0.0377	0.0348	0.0366	0.0348	0.0356	0.0415	0.0358	0.0333	0.0385	0.0544	0.0348	0.0365	0.0622	0.0376	0.0407	0.0446	0.0517	0.0566	0.0648	0.0753	0.088
	485	0.033	0.0354	0.0426	0.0348	0.0351	0.0354	0.0342	0.0433	0.0333	0.0351	0.0339	0.0342	0.0349	0.0357	0.0402	0.0449	0.0401	0.0436	0.0462	0.0542	0.0578	0.0661	0.0758	0.0814		485	0.033	0.0354	0.0351	0.0371	0.0337	0.0338	0.0423	0.0341	0.0331	0.0369	0.0545	0.0342	0.0365	0.0605	0.0362	0.0379	0.0405	0.0439	0.047	0.0527	0.0583	0.0663
	490	0.0326	0.035	0.0423	0.0344	0.0331	0.0343	0.0332	0.0434	0.0331	0.0351	0.0335	0.0341	0.0336	0.0352	0.0386	0.0422	0.0382	0.04	0.0417	0.0476	0.0486	0.0564	0.0621	0.0646		490	0.0326	0.035	0.0332	0.0361	0.0327	0.0329	0.0414	0.0339	0.0335	0.0372	0.0538	0.0335	0.0353	0.0605	0.0356	0.0357	0.0387	0.0411	0.0429	0.0457	0.0495	0.0552
	495	0.0352	0.0367	0.0433	0.0366	0.0347	0.0361	0.0356	0.045	0.036	0.0381	0.035	0.035	0.0352	0.0379	0.0407	0.0439	0.0389	0.0397	0.0416	0.0451	0.0452	0.0505	0.055	0.0552		495	0.0352	0.0367	0.0346	0.0376	0.0353	0.0353	0.0434	0.0352	0.035	0.0392	0.0552	0.0356	0.0364	0.0648	0.0371	0.0371	0.0387	0.0401	0.041	0.0433	0.0449	0.05
	500	0.0336	0.0351	0.0435	0.0347	0.0337	0.0351	0.0346	0.0448	0.0353	0.0382	0.035	0.0341	0.0355	0.0383	0.0402	0.0424	0.0378	0.0374	0.0383	0.0417	0.0412	0.0447	0.0479	0.047		500	0.0336	0.0351	0.0357	0.0374	0.0353	0.0339	0.042	0.0344	0.0348	0.0386	0.0549	0.0362	0.0357	0.0636	0.036	0.0358	0.0373	0.039	0.0387	0.0393	0.0404	0.0435
	505	0.033	0.0339	0.0421	0.0353	0.0333	0.0346	0.0337	0.0441	0.0339	0.0367	0.0335	0.0344	0.0346	0.0365	0.0394	0.0416	0.0363	0.0367	0.036	0.0398	0.0381	0.0409	0.0439	0.0425		505	0.033	0.0339	0.0344	0.037	0.0346	0.0331	0.0413	0.0336	0.0341	0.037	0.0538	0.0349	0.0353	0.0625	0.0364	0.0345	0.0358	0.0369	0.0379	0.0378	0.0371	0.0387
	510	0.0344	0.0356	0.0429	0.0345	0.0343	0.0338	0.0347	0.0446	0.0342	0.036	0.0346	0.0351	0.0343	0.0354	0.038	0.0403	0.0354	0.0357	0.0341	0.0386	0.0353	0.0389	0.0394	0.0385		510	0.0344	0.0356	0.0338	0.0358	0.0348	0.0336	0.0411	0.0336	0.0337	0.0366	0.0541	0.0337	0.0342	0.0623	0.0356	0.0347	0.0356	0.0366	0.0353	0.0355	0.0359	0.0368
	515	0.0342	0.0361	0.042	0.0344	0.0332	0.0358	0.0355	0.0449	0.0352	0.0373	0.0346	0.0358	0.0353	0.0356	0.0389	0.0421	0.0357	0.0366	0.0351	0.0374	0.0354	0.0384	0.0385	0.0372		515	0.0342	0.0361	0.0351	0.0363	0.0341	0.0344	0.0424	0.0344	0.0354	0.0377	0.0547	0.0345	0.0355	0.0631	0.0363	0.0345	0.0363	0.0364	0.0351	0.0373	0.0362	0.0368
	520	0.0336	0.035	0.0415	0.0345	0.0345	0.0341	0.0345	0.0441	0.0333	0.0355	0.0332	0.0344	0.0343	0.0362	0.0391	0.0414	0.0354	0.0358	0.0348	0.0367	0.0359	0.0375	0.0378	0.0354		520	0.0336	0.035	0.0352	0.0361	0.0326	0.0338	0.0421	0.0335	0.0338	0.0372	0.0537	0.0336	0.0351	0.0626	0.0344	0.0345	0.0342	0.0352	0.035	0.0343	0.0338	0.035
	525	0.0337	0.0357	0.0423	0.0347	0.0336	0.0343	0.0349	0.0453	0.0352	0.0366	0.0354	0.0351	0.0347	0.0368	0.0395	0.0405	0.0359	0.0357	0.0352	0.0371	0.0363	0.0363	0.0381	0.0356		525	0.0337	0.0357	0.0353	0.0367	0.0341	0.0338	0.0423	0.0349	0.0346	0.0377	0.0535	0.0346	0.0357	0.0635	0.0352	0.0347	0.0354	0.0368	0.0352	0.0359	0.0348	0.0353
	530	0.0318	0.0331	0.0401	0.0338	0.0341	0.0338	0.0326	0.042	0.032	0.0336	0.0323	0.0327	0.0322	0.0341	0.0384	0.0395	0.0342	0.0337	0.0344	0.0364	0.0331	0.033	0.0356	0.0334		530	0.0318	0.0331	0.0333	0.0347	0.0326	0.0318	0.0407	0.0308	0.0321	0.0355	0.0528	0.0334	0.0339	0.0615	0.0337	0.0329	0.0335	0.0331	0.0334	0.0322	0.0326	0.0328
	535	0.0332	0.0349	0.0409	0.0342	0.0345	0.0333	0.033	0.0432	0.0332	0.0352	0.0333	0.0342	0.0341	0.0351	0.04	0.0408	0.0353	0.0357	0.0346	0.0369	0.0331	0.0349	0.0362	0.0342		535	0.0332	0.0349	0.0344	0.0363	0.0332	0.0337	0.0408	0.0329	0.0335	0.0368	0.0533	0.0338	0.0346	0.0619	0.0345	0.0333	0.0349	0.0344	0.0343	0.0338	0.0329	0.0334
	540	0.0345	0.0347	0.0419	0.0342	0.0329	0.0335	0.0338	0.0451	0.0346	0.0363	0.0346	0.035	0.0345	0.0356	0.0403	0.0401	0.0351	0.0343	0.0336	0.0362	0.0338	0.0366	0.0367	0.0345		540	0.0345	0.0347	0.0332	0.0358	0.0342	0.0341	0.0411	0.0344	0.0342	0.0381	0.0534	0.0346	0.0352	0.0634	0.035	0.0338	0.035	0.0363	0.0353	0.0352	0.0341	0.0347
	545	0.0322	0.0338	0.0409	0.0331	0.0339	0.0336	0.0334	0.044	0.0339	0.0362	0.0335	0.0342	0.0333	0.0351	0.0395	0.0404	0.0347	0.0347	0.0338	0.0359	0.0336	0.0352	0.0366	0.0334		545	0.0322	0.0338	0.0335	0.0351	0.033	0.0324	0.0409	0.0322	0.0332	0.0369	0.0529	0.0334	0.0353	0.0631	0.0348	0.0337	0.0346	0.0343	0.0337	0.0341	0.0333	0.0341
	550	0.0344	0.0339	0.0426	0.0346	0.0357	0.0348	0.0351	0.0462	0.0361	0.0371	0.0347	0.0351	0.0353	0.0358	0.041	0.0426	0.0351	0.0356	0.0353	0.0373	0.0347	0.0366	0.0369	0.035		550	0.0344	0.0339	0.0343	0.0367	0.0341	0.0339	0.0418	0.0349	0.0347	0.0383	0.0547	0.0357	0.0363	0.065	0.0356	0.0349	0.0351	0.035	0.0342	0.0342	0.034	0.0339
	555	0.0345	0.0342	0.0422	0.0346	0.0346	0.0346	0.0342	0.0452	0.0352	0.0378	0.0363	0.0348	0.0359	0.036	0.04	0.0407	0.035	0.0349	0.0345	0.0366	0.0346	0.0355	0.0369	0.0348		555	0.0345	0.0342	0.0345	0.036	0.0336	0.0342	0.0405	0.0345	0.0341	0.0385	0.0545	0.0351	0.0368	0.0645	0.036	0.0341	0.0344	0.0356	0.0352	0.0345	0.0345	0.0358
	560	0.0346	0.0348	0.0413	0.0346	0.0354	0.0352	0.0349	0.0459	0.0346	0.0363	0.0346	0.0351	0.0346	0.0355	0.0406	0.0406	0.0353	0.0359	0.0346	0.037	0.0343	0.0353	0.0368	0.035		560	0.0346	0.0348	0.034	0.0368	0.0336	0.0341	0.0409	0.0337	0.035	0.0363	0.0542	0.0331	0.0357	0.0649	0.0359	0.0347	0.035	0.0354	0.0349	0.0348	0.0345	0.0349
	565	0.0355	0.0348	0.0421	0.0353	0.033	0.0348	0.0345	0.0466	0.0349	0.0367	0.0354	0.037	0.0363	0.0355	0.0396	0.0404	0.0353	0.0347	0.0345	0.0366	0.0344	0.0364	0.037	0.0344		565	0.0355	0.0348	0.0342	0.0364	0.034	0.0346	0.0422	0.0347	0.0354	0.0373	0.0546	0.0339	0.037	0.065	0.037	0.0341	0.0357	0.0369	0.0361	0.0351	0.0362	0.0357
	570	0.034	0.0354	0.0418	0.0342	0.0339	0.0343	0.0351	0.0463	0.0352	0.0373	0.0354	0.0359	0.0346	0.0362	0.0398	0.0407	0.0349	0.0357	0.0352	0.0368	0.0346	0.0369	0.0377	0.0345		570	0.034	0.0354	0.0349	0.0364	0.0349	0.034	0.0415	0.0339	0.0353	0.038	0.0543	0.0351	0.0353	0.0649	0.0369	0.0346	0.0352	0.0368	0.0353	0.0347	0.0347	0.0347
	575	0.0339	0.035	0.0412	0.0335	0.0331	0.0335	0.034	0.0449	0.034	0.0351	0.0343	0.0354	0.0346	0.0352	0.0394	0.0396	0.0344	0.0345	0.0338	0.0363	0.0339	0.0352	0.036	0.0339		575	0.0339	0.035	0.0335	0.0355	0.0338	0.0334	0.0413	0.0339	0.0342	0.0376	0.054	0.0339	0.0346	0.0642	0.0348	0.0333	0.0341	0.0361	0.0337	0.034	0.0331	0.0344
	580	0.0345	0.0342	0.0416	0.0355	0.0353	0.0349	0.0345	0.0455	0.0353	0.0359	0.0338	0.0359	0.0346	0.0364	0.0398	0.0395	0.0355	0.035	0.0342	0.0363	0.0347	0.0355	0.0368	0.0348		580	0.0345	0.0342	0.0337	0.0365	0.0339	0.0342	0.0412	0.0336	0.0347	0.0382	0.053	0.0343	0.0353	0.065	0.0351	0.0348	0.0344	0.0352	0.035	0.0346	0.0342	0.0353
	585	0.0349	0.0344	0.0416	0.0332	0.0332	0.0329	0.0338	0.0465	0.0352	0.0369	0.0346	0.0359	0.0355	0.0357	0.0397	0.0381	0.0337	0.0341	0.0328	0.0353	0.0341	0.0366	0.0377	0.0346		585	0.0349	0.0344	0.0329	0.0352	0.0341	0.0341	0.0408	0.0348	0.034	0.0379	0.0548	0.0348	0.0353	0.0647	0.0349	0.034	0.0349	0.0367	0.0363	0.0353	0.0357	0.0333
	590	0.0338	0.0343	0.0413	0.0342	0.0345	0.0333	0.0345	0.0459	0.035	0.0362	0.0352	0.0357	0.0358	0.0353	0.0402	0.04	0.0351	0.0347	0.034	0.0368	0.0338	0.0359	0.0371	0.0343		590	0.0338	0.0343	0.0341	0.0368	0.034	0.0348	0.0413	0.0344	0.0341	0.0363	0.054	0.0343	0.0359	0.0652	0.036	0.0333	0.0345	0.0357	0.0357	0.0346	0.0343	0.034
	595	0.0345	0.0356	0.0423	0.035	0.0338	0.0343	0.0344	0.0472	0.0356	0.0368	0.0361	0.037	0.0358	0.0364	0.0399	0.0401	0.0349	0.0351	0.0342	0.0371	0.0352	0.0367	0.0369	0.0348		595	0.0345	0.0356	0.0341	0.0362	0.0349	0.0342	0.0422	0.0355	0.0353	0.0387	0.0555	0.0349	0.0363	0.0653	0.0353	0.0353	0.0356	0.0366	0.0367	0.0357	0.0344	0.0343
	600	0.0325	0.0343	0.0403	0.0341	0.0341	0.0333	0.0337	0.0453	0.0337	0.035	0.0347	0.0366	0.0349	0.0345	0.039	0.0398	0.0337	0.0339	0.0338	0.0361	0.034	0.0354	0.0358	0.0333		600	0.0325	0.0343	0.0334	0.0351	0.0347	0.0333	0.0412	0.0332	0.0339	0.0367	0.0543	0.0343	0.0357	0.0643	0.0347	0.0347	0.0354	0.0353	0.0352	0.0343	0.0334	0.0334
	605	0.0335	0.0342	0.0407	0.0343	0.0331	0.0341	0.0327	0.0463	0.0338	0.0354	0.0338	0.0352	0.0349	0.0347	0.0387	0.039	0.0332	0.0338	0.0334	0.0349	0.0338	0.036	0.0363	0.0339		605	0.0335	0.0342	0.0335	0.0357	0.0345	0.0328	0.0416	0.0338	0.0347	0.0376	0.0542	0.0339	0.0354	0.0637	0.0355	0.0348	0.0351	0.0354	0.0349	0.0354	0.0346	0.0349
	610	0.0331	0.0339	0.0407	0.0341	0.0348	0.0354	0.0335	0.0465	0.0333	0.0352	0.0337	0.0346	0.0339	0.0351	0.0399	0.0402	0.0362	0.0353	0.035	0.0366	0.0344	0.0353	0.0365	0.0344		610	0.0331	0.0339	0.0344	0.0365	0.0339	0.0334	0.0426	0.0325	0.0339	0.0364	0.0538	0.0337	0.0352	0.0653	0.0356	0.0346	0.0349	0.035	0.0347	0.033	0.0338	0.0341
	615	0.0341	0.0344	0.0405	0.0333	0.0338	0.0337	0.0338	0.0462	0.0336	0.0351	0.0347	0.0353	0.035	0.0349	0.0391	0.0398	0.0352	0.0345	0.034	0.0359	0.0335	0.0355	0.0351	0.0344		615	0.0341	0.0344	0.0342	0.0359	0.034	0.0343	0.0412	0.0337	0.0342	0.0371	0.0548	0.0347	0.0347	0.0664	0.0348	0.034	0.034	0.0344	0.0355	0.035	0.0344	0.0342
	620	0.0349	0.034	0.0412	0.0338	0.0333	0.0328	0.034	0.0472	0.0346	0.0359	0.0356	0.0353	0.0359	0.0351	0.0388	0.039	0.0343	0.0348	0.0331	0.0352	0.0345	0.0356	0.0353	0.0336		620	0.0349	0.034	0.0339	0.0366	0.0341	0.0345	0.0394	0.0345	0.0352	0.0383	0.0544	0.0349	0.0351	0.0649	0.0347	0.0342	0.0342	0.0358	0.036	0.0358	0.0351	0.0336
	625	0.0344	0.0347	0.0413	0.0348	0.0337	0.0329	0.0336	0.0479	0.034	0.0363	0.0355	0.0358	0.0353	0.036	0.0385	0.0374	0.0328	0.0339	0.0327	0.0352	0.0339	0.0366	0.0364	0.034		625	0.0344	0.0347	0.034	0.0354	0.0333	0.0351	0.0407	0.0356	0.0349	0.0386	0.0553	0.0351	0.0353	0.0655	0.0351	0.0353	0.0345	0.0363	0.037	0.0362	0.0359	0.0354
	630	0.0319	0.0343	0.0394	0.0328	0.0325	0.0329	0.033	0.0444	0.0319	0.0342	0.0325	0.0336	0.033	0.0346	0.0368	0.0376	0.0332	0.0333	0.0321	0.0342	0.0331	0.0337	0.035	0.0329		630	0.0319	0.0343	0.0319	0.0344	0.0326	0.0331	0.039	0.0326	0.0329	0.0352	0.0516	0.0328	0.0337	0.0638	0.0337	0.0336	0.0331	0.0338	0.0347	0.0336	0.033	0.0335
	635	0.0334	0.0347	0.0401	0.0325	0.0324	0.0313	0.0318	0.045	0.0327	0.0344	0.0343	0.0341	0.0333	0.0347	0.0364	0.0365	0.0319	0.0319	0.0318	0.0319	0.0319	0.034	0.0346	0.0334		635	0.0334	0.0347	0.0322	0.0349	0.0325	0.0335	0.0403	0.0344	0.0339	0.0355	0.0539	0.0335	0.0335	0.0646	0.0324	0.0327	0.0336	0.0336	0.0356	0.0343	0.0336	0.0338
	640	0.0324	0.0341	0.0397	0.0327	0.0323	0.0332	0.0324	0.0463	0.0331	0.0345	0.0328	0.0351	0.0335	0.0341	0.0372	0.0384	0.0344	0.0332	0.0333	0.0359	0.0337	0.0326	0.0349	0.0341		640	0.0324	0.0341	0.0346	0.0351	0.0327	0.0323	0.0411	0.0331	0.0339	0.0367	0.0538	0.0347	0.0347	0.066	0.0344	0.0324	0.034	0.0346	0.0356	0.0336	0.0344	0.0332
	645	0.0331	0.0343	0.0401	0.0331	0.0312	0.0315	0.0319	0.0457	0.0336	0.0347	0.0334	0.0341	0.0319	0.0347	0.035	0.0368	0.0328	0.0324	0.0318	0.0335	0.0331	0.0341	0.0358	0.0323		645	0.0331	0.0343	0.0333	0.0345	0.0324	0.0331	0.0405	0.0335	0.034	0.0365	0.0537	0.0337	0.035	0.0649	0.0335	0.0334	0.0335	0.0348	0.0354	0.0352	0.0341	0.0337
	650	0.0331	0.0331	0.0392	0.0328	0.0317	0.0314	0.032	0.0462	0.0324	0.0344	0.0341	0.0339	0.0326	0.0338	0.037	0.0365	0.032	0.0324	0.0325	0.0339	0.0329	0.0355	0.0341	0.0316		650	0.0331	0.0331	0.0334	0.0347	0.0334	0.032	0.0412	0.0334	0.0341	0.0371	0.0534	0.0337	0.0342	0.0645	0.0334	0.0338	0.0329	0.0349	0.0361	0.0354	0.034	0.0339
	655	0.0317	0.0327	0.0381	0.0324	0.0316	0.0318	0.031	0.0453	0.0326	0.0334	0.0319	0.0328	0.0324	0.0337	0.0366	0.036	0.032	0.0309	0.0312	0.0332	0.0323	0.0343	0.0335	0.0317		655	0.0317	0.0327	0.0324	0.0348	0.0318	0.0314	0.0393	0.0333	0.0315	0.0361	0.0529	0.0327	0.0326	0.0654	0.0337	0.0329	0.0318	0.034	0.0351	0.0336	0.0326	0.0328
	660	0.0299	0.0336	0.038	0.0305	0.0306	0.0315	0.0309	0.0451	0.0319	0.0318	0.0311	0.0329	0.0313	0.032	0.0347	0.0358	0.0313	0.0313	0.0324	0.0339	0.0309	0.0326	0.0335	0.0322		660	0.0299	0.0336	0.0322	0.0331	0.0303	0.0317	0.0386	0.0319	0.0315	0.0342	0.0517	0.0321	0.0326	0.0628	0.0323	0.0317	0.0321	0.0316	0.0337	0.0323	0.0324	0.0328
	665	0.0303	0.0337	0.0393	0.0322	0.0307	0.0325	0.0313	0.0454	0.0315	0.033	0.0323	0.0325	0.0312	0.0322	0.0358	0.0375	0.0331	0.0323	0.0322	0.0341	0.0321	0.032	0.0334	0.0327		665	0.0303	0.0337	0.0337	0.0347	0.0318	0.0331	0.0392	0.0325	0.0329	0.0349	0.053	0.032	0.0336	0.0648	0.0332	0.0321	0.0333	0.0332	0.0345	0.0325	0.0329	0.0329
	670	0.0324	0.0335	0.0383	0.0322	0.0301	0.0322	0.0306	0.0444	0.0315	0.033	0.0322	0.033	0.0319	0.0326	0.0347	0.0367	0.0327	0.0322	0.0317	0.033	0.0325	0.0334	0.0348	0.0318		670	0.0324	0.0335	0.0332	0.0342	0.0325	0.0309	0.04	0.0331	0.0326	0.0354	0.0525	0.0325	0.0335	0.0647	0.0321	0.0327	0.0324	0.0327	0.035	0.0327	0.0335	0.0333
	675	0.0308	0.0336	0.038	0.0318	0.0319	0.0328	0.0322	0.0436	0.0313	0.0333	0.0324	0.0318	0.0317	0.034	0.0359	0.037	0.0331	0.0322	0.0316	0.0334	0.0324	0.0333	0.0339	0.0318		675	0.0308	0.0336	0.0328	0.0342	0.0316	0.0316	0.039	0.0329	0.0315	0.0358	0.0523	0.0329	0.0331	0.0652	0.034	0.0325	0.0318	0.0328	0.0338	0.0326	0.0345	0.0315
	680	0.0315	0.0343	0.0389	0.032	0.0336	0.0316	0.0322	0.0453	0.0319	0.0335	0.0337	0.0329	0.0322	0.0344	0.0371	0.0372	0.0337	0.0325	0.0329	0.0342	0.0309	0.0339	0.036	0.0326		680	0.0315	0.0343	0.0336	0.0347	0.0322	0.032	0.0403	0.0324	0.0327	0.0362	0.0524	0.0334	0.0341	0.0653	0.0343	0.0328	0.0347	0.0345	0.0355	0.035	0.0342	0.0323
	685	0.031	0.0332	0.0381	0.0314	0.0314	0.0305	0.0315	0.0441	0.032	0.0334	0.0317	0.0324	0.0309	0.0333	0.0362	0.0365	0.0336	0.0326	0.0321	0.0342	0.0327	0.0335	0.0326	0.0328		685	0.031	0.0332	0.0313	0.0331	0.0322	0.0319	0.0394	0.0316	0.0312	0.0352	0.0523	0.0326	0.0348	0.0647	0.0332	0.0321	0.0332	0.0339	0.0345	0.0334	0.0329	0.0333
	690	0.0311	0.0322	0.0384	0.0311	0.0306	0.0296	0.0301	0.0426	0.0313	0.033	0.031	0.032	0.0312	0.032	0.0333	0.0345	0.032	0.0311	0.0312	0.0323	0.0315	0.0321	0.0329	0.0321		690	0.0311	0.0322	0.0309	0.0316	0.0308	0.0297	0.0374	0.0324	0.031	0.0335	0.0518	0.0314	0.0316	0.064	0.0308	0.0307	0.0321	0.0314	0.0333	0.0317	0.0326	0.0303
	695	0.0321	0.0346	0.0378	0.0331	0.0318	0.0321	0.0302	0.0427	0.0316	0.0348	0.0325	0.0343	0.0321	0.0329	0.0349	0.037	0.0333	0.0322	0.0336	0.0339	0.0324	0.0347	0.0344	0.0328		695	0.0321	0.0346	0.033	0.0353	0.0318	0.0325	0.0387	0.0336	0.033	0.0356	0.0515	0.0334	0.033	0.0652	0.0337	0.0326	0.0334	0.0332	0.0355	0.0336	0.034	0.0329
	700	0.0303	0.0348	0.0385	0.033	0.0329	0.0327	0.0316	0.0418	0.0318	0.0334	0.0318	0.0338	0.032	0.0331	0.0371	0.0388	0.0345	0.0345	0.0337	0.0346	0.0324	0.0341	0.0354	0.0326		700	0.0303	0.0348	0.0348	0.0355	0.0331	0.0327	0.0409	0.0331	0.0332	0.0349	0.0512	0.0334	0.0337	0.0656	0.035	0.0334	0.0342	0.034	0.0345	0.0342	0.0337	0.0323
	705	0.0306	0.0352	0.0387	0.0332	0.0328	0.0327	0.0327	0.0427	0.0317	0.0328	0.0319	0.033	0.0314	0.0331	0.0379	0.0384	0.0352	0.0346	0.033	0.0358	0.0332	0.0337	0.0351	0.0332		705	0.0306	0.0352	0.0348	0.0356	0.033	0.0335	0.0404	0.033	0.0323	0.0358	0.0526	0.0329	0.0353	0.0661	0.0348	0.0343	0.0339	0.0339	0.036	0.0343	0.034	0.0348
	710	0.032	0.0348	0.0403	0.0336	0.0334	0.0318	0.0324	0.044	0.0338	0.0338	0.0333	0.0342	0.034	0.0354	0.0368	0.0364	0.0335	0.0335	0.0339	0.0356	0.0326	0.034	0.0346	0.0344		710	0.032	0.0348	0.0344	0.0349	0.0335	0.0325	0.0404	0.0342	0.0335	0.0354	0.0534	0.0339	0.0335	0.0675	0.0346	0.0337	0.0351	0.0344	0.0369	0.0343	0.0348	0.0347
	715	0.0326	0.0338	0.0391	0.0324	0.0314	0.0314	0.0313	0.042	0.0341	0.0335	0.0335	0.0349	0.0325	0.0351	0.0359	0.0346	0.0333	0.0323	0.0324	0.035	0.0328	0.0349	0.0346	0.0336		715	0.0326	0.0338	0.0322	0.0336	0.0329	0.0316	0.04	0.0333	0.0327	0.0347	0.0522	0.0325	0.0312	0.0675	0.0339	0.0337	0.033	0.0338	0.0357	0.034	0.0342	0.0339
	720	0.0333	0.0352	0.0401	0.0334	0.0341	0.0337	0.0331	0.0426	0.0351	0.036	0.0341	0.0359	0.0346	0.0359	0.0362	0.038	0.035	0.0345	0.0343	0.0371	0.0349	0.037	0.0378	0.0354		720	0.0333	0.0352	0.0352	0.0365	0.0345	0.0345	0.041	0.0349	0.035	0.0366	0.0529	0.0348	0.0323	0.0687	0.0356	0.0346	0.0354	0.0354	0.0363	0.0344	0.0348	0.0346
	725	0.0341	0.0361	0.0411	0.0349	0.0339	0.0339	0.0335	0.0439	0.0358	0.0361	0.0363	0.0369	0.0355	0.0362	0.0382	0.0393	0.0351	0.0352	0.0353	0.038	0.0346	0.0375	0.0371	0.0362		725	0.0341	0.0361	0.0368	0.0384	0.0353	0.0349	0.0409	0.0359	0.0341	0.0375	0.0537	0.0346	0.0339	0.0697	0.0374	0.0353	0.035	0.0372	0.0387	0.0357	0.0366	0.035
	730	0.036	0.0386	0.0413	0.037	0.0356	0.0356	0.0347	0.0438	0.0354	0.0362	0.0349	0.0373	0.0348	0.0354	0.0388	0.0419	0.0376	0.0361	0.0366	0.0383	0.0363	0.0383	0.0377	0.0365		730	0.036	0.0386	0.038	0.0384	0.0357	0.0371	0.0434	0.0367	0.0367	0.0401	0.0562	0.0353	0.036	0.0697	0.0379	0.0375	0.0365	0.0384	0.0388	0.0383	0.0383	0.038
	735	0.0361	0.0399	0.0437	0.0383	0.0385	0.0384	0.0375	0.0453	0.0375	0.0382	0.0367	0.0382	0.0377	0.0381	0.041	0.0435	0.0396	0.0396	0.0396	0.0403	0.0386	0.0386	0.0406	0.0381		735	0.0361	0.0399	0.0396	0.0411	0.0381	0.0382	0.0458	0.0386	0.0381	0.0418	0.0587	0.0381	0.039	0.0715	0.0407	0.0395	0.0393	0.04	0.0412	0.0396	0.0395	0.0398
	740	0.0379	0.0412	0.0449	0.0397	0.0404	0.039	0.0399	0.0471	0.0395	0.0404	0.0398	0.0407	0.0383	0.0405	0.0418	0.0443	0.0408	0.04	0.0409	0.0425	0.0392	0.0401	0.0417	0.0402		740	0.0379	0.0412	0.0415	0.0416	0.04	0.0393	0.0478	0.0399	0.0392	0.0432	0.0598	0.0402	0.0418	0.0726	0.041	0.04	0.0415	0.0415	0.0428	0.0407	0.0404	0.0411
	745	0.0391	0.0427	0.0471	0.0391	0.0411	0.0402	0.0414	0.0492	0.0417	0.0424	0.0401	0.0418	0.0407	0.0426	0.0436	0.0453	0.0414	0.042	0.0417	0.0437	0.0405	0.0427	0.0428	0.0422		745	0.0391	0.0427	0.0418	0.0433	0.0415	0.0418	0.0484	0.0411	0.0413	0.0433	0.0612	0.041	0.0424	0.0734	0.0424	0.0409	0.0428	0.0431	0.0445	0.0426	0.042	0.0417
	750	0.0369	0.042	0.0459	0.0393	0.0396	0.0393	0.0402	0.0469	0.0408	0.0412	0.0384	0.0402	0.0403	0.0399	0.0423	0.0451	0.0415	0.0409	0.0412	0.0429	0.0394	0.042	0.0419	0.0413		750	0.0369	0.042	0.0414	0.0428	0.0421	0.0414	0.0471	0.04	0.0402	0.0434	0.0602	0.0413	0.0418	0.0751	0.0425	0.0415	0.042	0.0425	0.0429	0.041	0.042	0.0421
	755	0.0383	0.0426	0.0459	0.0412	0.0398	0.0408	0.0397	0.0465	0.0402	0.0412	0.0389	0.0416	0.0403	0.0409	0.0442	0.0455	0.0412	0.0416	0.0424	0.0445	0.0406	0.0423	0.0429	0.0417		755	0.0383	0.0426	0.0425	0.0433	0.0413	0.0407	0.0477	0.0416	0.0409	0.0445	0.0612	0.0409	0.041	0.0751	0.0442	0.041	0.0421	0.0429	0.0444	0.0415	0.0424	0.042
	760	0.0394	0.0419	0.0449	0.0406	0.0409	0.0414	0.04	0.0484	0.0396	0.0416	0.0397	0.0412	0.0409	0.0412	0.044	0.0461	0.0414	0.0423	0.0423	0.0441	0.0411	0.0415	0.0428	0.0419		760	0.0394	0.0419	0.0421	0.0418	0.0403	0.04	0.0474	0.0417	0.0418	0.0442	0.06	0.0411	0.0412	0.0749	0.0427	0.042	0.0427	0.0436	0.0442	0.0412	0.0418	0.0422
	765	0.0377	0.0411	0.0448	0.0406	0.0403	0.0394	0.0401	0.0462	0.0393	0.0394	0.0391	0.041	0.0384	0.04	0.0417	0.0454	0.0397	0.0403	0.0388	0.0427	0.0392	0.0403	0.041	0.04		765	0.0377	0.0411	0.0393	0.042	0.0404	0.0396	0.0474	0.0416	0.0407	0.0433	0.06	0.0403	0.0402	0.0733	0.0409	0.0405	0.0418	0.0422	0.0446	0.0418	0.0415	0.0404
	770	0.0395	0.0419	0.0464	0.0399	0.0402	0.0392	0.0397	0.046	0.0393	0.0402	0.0388	0.0404	0.0391	0.0399	0.0415	0.0455	0.0413	0.0413	0.0408	0.0426	0.0401	0.041	0.0416	0.0409		770	0.0395	0.0419	0.0415	0.0416	0.0408	0.0408	0.0464	0.0408	0.0396	0.042	0.0602	0.0414	0.0412	0.0745	0.0421	0.0411	0.0411	0.0409	0.0431	0.0419	0.0418	0.0415
	775	0.038	0.042	0.0464	0.0397	0.0404	0.0395	0.0402	0.0469	0.0407	0.0392	0.0386	0.0417	0.039	0.0401	0.0422	0.0448	0.0406	0.041	0.041	0.0423	0.0394	0.0418	0.0423	0.0409		775	0.038	0.042	0.0413	0.0412	0.0411	0.0413	0.0482	0.0408	0.0404	0.0419	0.0602	0.0411	0.0411	0.0751	0.0422	0.0405	0.041	0.0428	0.0439	0.0419	0.0425	0.0416
	780	0.0388	0.0407	0.0457	0.04	0.0398	0.0406	0.0393	0.0466	0.0407	0.04	0.0391	0.0415	0.0394	0.0414	0.0424	0.0452	0.0403	0.0419	0.0417	0.0444	0.0389	0.0416	0.0424	0.0414		780	0.0388	0.0407	0.0412	0.0433	0.0393	0.0402	0.0493	0.0411	0.0397	0.0428	0.0606	0.0415	0.0404	0.0743	0.0421	0.0414	0.0414	0.0415	0.0447	0.0411	0.042	0.0408
	785	0.0371	0.0419	0.0445	0.0398	0.0389	0.0409	0.0394	0.0468	0.0403	0.0405	0.0393	0.0421	0.0392	0.0406	0.0424	0.0457	0.0416	0.0418	0.0416	0.0433	0.0398	0.0409	0.0424	0.041		785	0.0371	0.0419	0.0414	0.0428	0.0403	0.0408	0.0483	0.0403	0.0411	0.0441	0.0601	0.0398	0.0406	0.0752	0.0419	0.0413	0.0427	0.0436	0.0443	0.0415	0.0425	0.0419
	790	0.0378	0.0407	0.0434	0.0382	0.0387	0.0389	0.0386	0.0451	0.0383	0.0394	0.0392	0.0384	0.0382	0.0388	0.0407	0.0442	0.0411	0.0401	0.0404	0.0413	0.0388	0.0388	0.0405	0.039		790	0.0378	0.0407	0.0402	0.0413	0.0392	0.0391	0.048	0.0396	0.0396	0.0417	0.0593	0.039	0.0405	0.074	0.041	0.0411	0.0411	0.041	0.0429	0.0411	0.0414	0.0407
	795	0.0394	0.0421	0.0444	0.0378	0.0389	0.0393	0.0392	0.0457	0.0398	0.0389	0.0384	0.0398	0.0386	0.0391	0.0402	0.0441	0.0413	0.0401	0.0401	0.0417	0.039	0.0395	0.0402	0.041		795	0.0394	0.0421	0.04	0.0418	0.0393	0.0391	0.0478	0.0402	0.0393	0.0424	0.058	0.0392	0.0401	0.0742	0.0412	0.0405	0.0406	0.0417	0.0439	0.0416	0.0417	0.0403
	800	0.0378	0.0405	0.0451	0.0375	0.0391	0.0391	0.039	0.0448	0.0389	0.0391	0.0376	0.0387	0.0396	0.0391	0.0403	0.0437	0.04	0.0407	0.0415	0.0415	0.0391	0.0405	0.0413	0.0411		800	0.0378	0.0405	0.0404	0.0414	0.0391	0.039	0.0476	0.0414	0.0397	0.0419	0.0582	0.04	0.0408	0.0745	0.0419	0.0393	0.0412	0.0408	0.0439	0.0402	0.0411	0.0405
[truncated: 27 more columns]

## Sheet: Figure S1_9_mM
	Aluminum Chelation, Run 1																										Aluminum Chelation, Run 2
	Blank = 295 μL Water + 5 μL DMSO																										Blank = 295 μL Water + 5 μL DMSO
	[Al3+] (µM)	Blank	0	0.00762939	0.0152588	0.0305176	0.0610352	0.12207	0.244141	0.488281	0.976562	1.95312	3.90625	7.8125	15.625	31.25	62.5	125	250	500	1000	2000	4000	8000	16000		[Al3+] (µM)	Blank	0	0.00762939	0.0152588	0.0305176	0.0610352	0.12207	0.244141	0.488281	0.976562	1.95312	3.90625	7.8125	15.625	31.25	62.5	125	250	500	1000	2000	4000
	Wavelength (nm)	Absorbance																									Wavelength (nm)	Absorbance
	300	0.337	0.6658	0.6683	0.6758	0.6744	0.6701	0.6865	0.6643	0.6713	0.6632	0.6887	0.663	0.6751	0.6866	0.6778	0.6568	0.6321	0.6469	0.6556	0.638	0.622	0.6374	0.6373	0.6255		300	0.3315	0.6823	0.6715	0.6745	0.6624	0.6376	0.6821	0.6744	0.6595	0.6717	0.6791	0.6686	0.6676	0.6668	0.6783	0.6497	0.5959	0.6593	0.6405	0.6455	0.6316	0.6276
	305	0.199	0.5302	0.5345	0.5406	0.5364	0.5352	0.55	0.5321	0.5391	0.5289	0.5447	0.5312	0.5376	0.5425	0.523	0.4996	0.4839	0.483	0.4869	0.4682	0.4584	0.4662	0.4645	0.4553		305	0.1952	0.5442	0.5327	0.5368	0.5335	0.5029	0.5459	0.5387	0.5289	0.5343	0.5396	0.5308	0.53	0.5242	0.5231	0.4948	0.4393	0.4921	0.4758	0.475	0.4651	0.4572
	310	0.1429	0.4833	0.4901	0.4925	0.489	0.4885	0.5006	0.4859	0.4912	0.4819	0.4936	0.4798	0.4826	0.4783	0.4527	0.4214	0.3992	0.3915	0.3885	0.3686	0.3598	0.3634	0.3624	0.3507		310	0.14	0.4974	0.4846	0.4895	0.4883	0.4541	0.4982	0.491	0.4836	0.4843	0.4893	0.4777	0.4802	0.4624	0.4498	0.4157	0.3573	0.397	0.3796	0.3718	0.3646	0.3561
	315	0.1231	0.4781	0.4851	0.4883	0.4833	0.4833	0.4948	0.4799	0.4854	0.475	0.4862	0.4721	0.4741	0.462	0.4297	0.3939	0.3702	0.3555	0.3452	0.3262	0.3185	0.3181	0.3158	0.307		315	0.121	0.4917	0.4784	0.4835	0.4833	0.4473	0.4922	0.4861	0.4779	0.4772	0.4824	0.4701	0.4713	0.4466	0.4262	0.3901	0.3289	0.3608	0.3401	0.329	0.3209	0.3115
	320	0.1095	0.4863	0.4944	0.4969	0.4914	0.4933	0.5044	0.489	0.4943	0.4834	0.4932	0.4774	0.4811	0.4624	0.4233	0.3872	0.362	0.3426	0.3315	0.3122	0.3036	0.3025	0.2994	0.2912		320	0.1074	0.5009	0.4862	0.4935	0.4929	0.4536	0.5031	0.4938	0.4873	0.4853	0.4914	0.4763	0.479	0.4481	0.4226	0.3838	0.3173	0.3482	0.3269	0.3134	0.3062	0.2965
	325	0.0965	0.5044	0.5144	0.5167	0.5098	0.5117	0.5239	0.5086	0.5131	0.5014	0.5109	0.4931	0.4969	0.4723	0.4307	0.3929	0.3673	0.345	0.3314	0.3116	0.3036	0.2997	0.2965	0.2879		325	0.0948	0.5203	0.5035	0.5109	0.512	0.4689	0.5221	0.5132	0.5068	0.5025	0.5088	0.4925	0.4945	0.46	0.4285	0.3893	0.3184	0.3495	0.3283	0.3134	0.305	0.2937
	330	0.0871	0.5267	0.5367	0.5386	0.5325	0.5339	0.5486	0.5316	0.5347	0.5242	0.5325	0.5129	0.5193	0.4919	0.4454	0.4084	0.3802	0.3534	0.3382	0.3163	0.3085	0.3027	0.2969	0.2895		330	0.0854	0.5429	0.5244	0.5344	0.5356	0.4872	0.5456	0.5358	0.5297	0.524	0.5313	0.5142	0.5146	0.4788	0.444	0.4047	0.3264	0.3593	0.3355	0.3182	0.3091	0.296
	335	0.079	0.556	0.5669	0.5708	0.5627	0.5645	0.5825	0.5611	0.5663	0.5533	0.5619	0.54	0.548	0.5182	0.4693	0.4322	0.4016	0.3699	0.3512	0.3283	0.3182	0.3103	0.3013	0.2934		335	0.077	0.574	0.554	0.5637	0.5662	0.5136	0.5773	0.5669	0.5602	0.5545	0.5623	0.5415	0.544	0.5071	0.4668	0.4276	0.3404	0.3749	0.3493	0.33	0.3191	0.303
	340	0.0679	0.5788	0.5902	0.5938	0.5858	0.5882	0.6081	0.585	0.5897	0.5758	0.5849	0.5626	0.5716	0.5393	0.4862	0.4505	0.4186	0.3819	0.3594	0.3353	0.3232	0.3128	0.3017	0.2938		340	0.0669	0.5975	0.5753	0.5875	0.5893	0.5321	0.601	0.5893	0.5838	0.5772	0.5863	0.5656	0.5657	0.5297	0.4854	0.4464	0.3512	0.3884	0.3587	0.3352	0.3236	0.3038
	345	0.0609	0.6017	0.6144	0.6177	0.6096	0.6119	0.6363	0.6084	0.6138	0.5987	0.6084	0.5837	0.5945	0.5631	0.5089	0.4726	0.4391	0.3982	0.3733	0.3461	0.3337	0.3195	0.307	0.2984		345	0.0604	0.6218	0.5979	0.6107	0.6139	0.5528	0.6261	0.6143	0.6068	0.5994	0.6089	0.5874	0.5889	0.553	0.507	0.4675	0.3645	0.4058	0.3729	0.3482	0.3327	0.3109
	350	0.0566	0.6187	0.6307	0.6342	0.6245	0.6288	0.6558	0.6242	0.6302	0.6145	0.624	0.5982	0.61	0.5792	0.524	0.49	0.4568	0.4116	0.3859	0.3582	0.3432	0.328	0.3139	0.3055		350	0.0556	0.6381	0.6139	0.627	0.6299	0.5673	0.6423	0.6299	0.6236	0.6166	0.6266	0.603	0.6048	0.5704	0.5238	0.4844	0.3782	0.4204	0.3866	0.3597	0.3428	0.3189
	355	0.053	0.6236	0.6365	0.6384	0.6295	0.6337	0.665	0.6286	0.636	0.6191	0.6295	0.6031	0.6162	0.5891	0.5358	0.5054	0.4725	0.4285	0.4037	0.3742	0.359	0.3441	0.3298	0.3202		355	0.0529	0.6451	0.6192	0.6308	0.6352	0.5702	0.6475	0.6341	0.6289	0.6227	0.6324	0.6093	0.6095	0.5822	0.5339	0.4997	0.3899	0.437	0.4035	0.3769	0.3595	0.3344
	360	0.0503	0.6085	0.6204	0.6215	0.6134	0.6175	0.6517	0.6128	0.6205	0.6042	0.6148	0.5886	0.6034	0.5832	0.535	0.5089	0.4806	0.4397	0.417	0.3871	0.3726	0.3578	0.3432	0.3331		360	0.0497	0.6279	0.6023	0.6137	0.6193	0.5551	0.6319	0.6179	0.613	0.6061	0.6169	0.5957	0.5966	0.5758	0.5329	0.5028	0.3961	0.4482	0.4171	0.3899	0.3729	0.3478
	365	0.0476	0.5771	0.5887	0.5889	0.5803	0.5855	0.6212	0.5805	0.5885	0.5731	0.5839	0.5613	0.5747	0.5659	0.5241	0.5048	0.4827	0.4465	0.4273	0.3983	0.3847	0.3709	0.3575	0.3459		365	0.0464	0.5959	0.571	0.5813	0.5863	0.5253	0.5984	0.5853	0.5815	0.5752	0.586	0.5679	0.568	0.558	0.5222	0.4991	0.3988	0.4549	0.4282	0.4014	0.3845	0.3605
	370	0.0473	0.5305	0.5417	0.5409	0.5322	0.5385	0.5728	0.5333	0.541	0.5259	0.5381	0.5206	0.5342	0.5407	0.5088	0.4995	0.485	0.4574	0.4445	0.4156	0.4032	0.3932	0.3807	0.3678		370	0.0465	0.5475	0.5258	0.5328	0.5392	0.4835	0.5503	0.5383	0.5338	0.5286	0.5414	0.5275	0.5279	0.5315	0.5077	0.4941	0.4039	0.4654	0.4453	0.419	0.4044	0.3816
	375	0.0444	0.4577	0.4674	0.4639	0.4581	0.4644	0.4985	0.4604	0.4676	0.4549	0.4672	0.457	0.4683	0.4984	0.4802	0.4848	0.4846	0.4674	0.4641	0.4377	0.428	0.4192	0.4094	0.3954		375	0.0441	0.4721	0.4531	0.4585	0.4653	0.4173	0.474	0.4646	0.4608	0.4584	0.4698	0.4623	0.4623	0.4871	0.4792	0.4802	0.4034	0.4755	0.4647	0.4401	0.427	0.4072
	380	0.0413	0.3779	0.3853	0.3819	0.3775	0.3835	0.4144	0.3806	0.3874	0.3768	0.3886	0.3855	0.3967	0.45	0.4481	0.4698	0.4824	0.4783	0.4857	0.461	0.4549	0.4488	0.4427	0.426		380	0.0404	0.3904	0.3738	0.3773	0.3821	0.3432	0.3906	0.3832	0.3813	0.3792	0.3923	0.3924	0.3891	0.4372	0.4466	0.4654	0.4042	0.487	0.4862	0.465	0.4545	0.4352
	385	0.0424	0.3075	0.3136	0.3094	0.3071	0.3116	0.3382	0.3095	0.3167	0.3066	0.321	0.324	0.335	0.4099	0.422	0.4604	0.4872	0.4968	0.513	0.4922	0.4899	0.4865	0.4835	0.4661		385	0.0415	0.3182	0.3047	0.3052	0.311	0.2796	0.3165	0.311	0.3102	0.3105	0.3226	0.3314	0.327	0.395	0.42	0.4547	0.4098	0.5048	0.5144	0.4963	0.4879	0.4727
	390	0.0413	0.2378	0.242	0.2371	0.2369	0.24	0.2629	0.2403	0.246	0.2394	0.2527	0.2626	0.2722	0.3673	0.3935	0.4477	0.4879	0.5113	0.5417	0.5234	0.5261	0.5265	0.5261	0.5076		390	0.0409	0.2462	0.2356	0.2352	0.2396	0.2171	0.2443	0.2397	0.2413	0.243	0.2549	0.2695	0.2626	0.3515	0.3923	0.442	0.4135	0.5197	0.5426	0.5276	0.524	0.5109
	395	0.042	0.1778	0.1793	0.1753	0.1761	0.1786	0.196	0.1789	0.1843	0.1811	0.1932	0.2079	0.2167	0.3266	0.3647	0.4328	0.4872	0.5246	0.5673	0.5556	0.5616	0.568	0.572	0.5518		395	0.0404	0.1836	0.1752	0.1738	0.1776	0.1621	0.1812	0.1792	0.1798	0.1834	0.1939	0.2143	0.2076	0.3097	0.3637	0.428	0.4138	0.5333	0.5691	0.559	0.5606	0.551
	400	0.04	0.1321	0.1342	0.1312	0.1307	0.1329	0.1471	0.1354	0.1399	0.1386	0.1503	0.1678	0.1758	0.2936	0.3395	0.4167	0.4815	0.5325	0.5888	0.5805	0.593	0.604	0.6144	0.5919		400	0.0408	0.1378	0.1323	0.1303	0.1324	0.1222	0.1361	0.1348	0.1359	0.1396	0.15	0.1723	0.167	0.2762	0.338	0.4116	0.4116	0.5404	0.5896	0.5843	0.5907	0.5869
	405	0.0378	0.0951	0.0969	0.0941	0.0941	0.0965	0.1045	0.0988	0.1027	0.1019	0.1133	0.1332	0.1401	0.2605	0.3104	0.3936	0.4667	0.5296	0.6011	0.5985	0.6179	0.6343	0.6521	0.6275		405	0.0382	0.0993	0.0951	0.094	0.0954	0.0898	0.0973	0.0978	0.0998	0.1032	0.1139	0.1381	0.1306	0.2422	0.3083	0.3896	0.4001	0.5373	0.6015	0.6023	0.6156	0.6171
	410	0.0386	0.0759	0.0767	0.0738	0.0743	0.076	0.0821	0.0784	0.0811	0.0818	0.0915	0.1122	0.1178	0.2368	0.2868	0.3696	0.4471	0.5202	0.6016	0.6048	0.6312	0.6535	0.6775	0.6511		410	0.038	0.0798	0.0764	0.0743	0.075	0.0711	0.0762	0.0775	0.0785	0.0842	0.092	0.1158	0.11	0.2178	0.284	0.3658	0.3855	0.526	0.603	0.6082	0.6287	0.6357
	415	0.0386	0.062	0.0629	0.0605	0.0615	0.0628	0.0654	0.0649	0.0679	0.0672	0.0765	0.0954	0.1017	0.2108	0.2596	0.3395	0.4218	0.501	0.5959	0.6032	0.6361	0.6657	0.6956	0.6681		415	0.038	0.0663	0.0622	0.0606	0.0613	0.0593	0.0636	0.0643	0.0655	0.0693	0.0765	0.1002	0.0929	0.1933	0.2572	0.3365	0.3659	0.5087	0.595	0.6065	0.6346	0.646
	420	0.0351	0.0486	0.049	0.0489	0.0485	0.0492	0.0496	0.0529	0.0539	0.0544	0.0625	0.0799	0.0834	0.1814	0.2252	0.3	0.3819	0.4668	0.5713	0.5824	0.622	0.6585	0.6943	0.6646		420	0.0345	0.0523	0.049	0.0486	0.0496	0.0471	0.0512	0.0503	0.052	0.0562	0.0625	0.083	0.0773	0.1635	0.2234	0.2969	0.3343	0.474	0.5703	0.5865	0.6205	0.6386
	425	0.0359	0.045	0.0446	0.0447	0.0453	0.0449	0.0457	0.0473	0.0497	0.0505	0.0563	0.0725	0.0732	0.1617	0.1997	0.2692	0.349	0.4359	0.5439	0.5602	0.6024	0.6407	0.6816	0.6527		425	0.036	0.0486	0.0453	0.0451	0.0449	0.0434	0.0455	0.0454	0.0477	0.0516	0.0552	0.0726	0.0685	0.144	0.1979	0.2672	0.3069	0.441	0.5435	0.5628	0.5995	0.6219
	430	0.0376	0.0447	0.0452	0.0452	0.0458	0.0458	0.0464	0.0482	0.0499	0.0488	0.0554	0.0699	0.0707	0.1483	0.1805	0.243	0.3193	0.4054	0.5179	0.5325	0.5767	0.6195	0.6599	0.6325		430	0.0372	0.048	0.0446	0.0462	0.046	0.0445	0.0466	0.0472	0.0476	0.0515	0.0546	0.07	0.066	0.13	0.178	0.2402	0.2838	0.4135	0.5133	0.5357	0.576	0.5999
	435	0.0372	0.0425	0.0438	0.0442	0.0453	0.0451	0.0444	0.0463	0.0489	0.0458	0.0506	0.0651	0.066	0.1313	0.1567	0.2099	0.2828	0.3635	0.4742	0.4878	0.5347	0.5778	0.6177	0.591		435	0.0365	0.0463	0.0436	0.0446	0.0452	0.0444	0.0455	0.0459	0.0459	0.0492	0.0517	0.0651	0.0617	0.1122	0.1532	0.2086	0.2513	0.3713	0.468	0.4914	0.5345	0.5575
	440	0.0346	0.039	0.0384	0.0408	0.0408	0.0401	0.0399	0.0424	0.044	0.0418	0.0461	0.0572	0.0566	0.1122	0.1312	0.1758	0.2404	0.3144	0.4166	0.4312	0.4744	0.5156	0.5534	0.5299		440	0.0347	0.0426	0.0394	0.0412	0.0405	0.0395	0.041	0.0408	0.0412	0.0441	0.0445	0.0558	0.0535	0.0927	0.1282	0.1741	0.216	0.3209	0.4119	0.4346	0.4742	0.4975
	445	0.0359	0.0396	0.039	0.041	0.0408	0.0401	0.0402	0.0412	0.0431	0.0419	0.0447	0.0544	0.0526	0.0997	0.1129	0.1503	0.206	0.2714	0.3612	0.3748	0.4143	0.4506	0.4851	0.4647		445	0.0363	0.0426	0.04	0.0405	0.0406	0.0397	0.0411	0.0405	0.0414	0.0432	0.0437	0.0521	0.051	0.081	0.1111	0.1492	0.1875	0.2763	0.3577	0.3779	0.4146	0.4352
	450	0.0348	0.0379	0.037	0.0389	0.0396	0.038	0.0378	0.0401	0.0404	0.0397	0.0426	0.0502	0.0473	0.0887	0.096	0.1253	0.1727	0.229	0.3041	0.3163	0.3507	0.3812	0.411	0.3941		450	0.035	0.0409	0.0373	0.0389	0.0387	0.0376	0.0398	0.0375	0.0392	0.0409	0.0407	0.0468	0.0469	0.0702	0.0942	0.1253	0.1576	0.2302	0.3008	0.3182	0.349	0.3679
	455	0.0356	0.0385	0.0375	0.0392	0.0397	0.0384	0.0391	0.0406	0.0406	0.0402	0.0422	0.05	0.0458	0.0811	0.0839	0.1063	0.1444	0.1884	0.2504	0.2588	0.2872	0.3127	0.3376	0.3232		455	0.0363	0.0416	0.0385	0.0404	0.0385	0.0376	0.0407	0.0393	0.0402	0.0418	0.0404	0.0449	0.0459	0.0621	0.0825	0.1063	0.1332	0.1909	0.247	0.2606	0.2877	0.3017
	460	0.0358	0.0379	0.0376	0.039	0.04	0.0383	0.0388	0.04	0.0409	0.0396	0.0413	0.048	0.0443	0.0747	0.0728	0.0889	0.1178	0.1488	0.1971	0.201	0.2231	0.2419	0.259	0.2499		460	0.0351	0.0418	0.0375	0.0395	0.0386	0.0384	0.04	0.0384	0.0396	0.0408	0.0398	0.0438	0.044	0.0556	0.0709	0.0876	0.109	0.1512	0.1924	0.2028	0.2247	0.2323
	465	0.0357	0.0381	0.0381	0.0399	0.0406	0.0387	0.0386	0.0412	0.0415	0.0385	0.0402	0.0486	0.0453	0.0707	0.0661	0.0743	0.0988	0.1214	0.1593	0.159	0.1771	0.1911	0.2033	0.1976		465	0.0343	0.0416	0.0377	0.0406	0.0399	0.039	0.04	0.0387	0.0407	0.0413	0.0402	0.0447	0.0441	0.0508	0.064	0.0736	0.0917	0.1244	0.1536	0.161	0.1782	0.1833
	470	0.0353	0.0378	0.0399	0.0413	0.0418	0.0405	0.0414	0.0415	0.0429	0.0395	0.0418	0.049	0.0481	0.071	0.0623	0.068	0.0856	0.0993	0.1283	0.1251	0.1389	0.1491	0.156	0.1538		470	0.0356	0.0425	0.0386	0.041	0.0423	0.042	0.0426	0.0416	0.0399	0.0432	0.0417	0.0483	0.0447	0.0494	0.0591	0.0658	0.0798	0.1041	0.1216	0.1273	0.1421	0.1435
	475	0.0356	0.0376	0.0393	0.0406	0.042	0.0398	0.0398	0.0412	0.0425	0.0373	0.0412	0.0476	0.0456	0.066	0.0556	0.0602	0.0721	0.0794	0.0988	0.0951	0.107	0.1142	0.1176	0.1157		475	0.0342	0.0411	0.0381	0.0404	0.0407	0.0408	0.0416	0.0397	0.0398	0.0429	0.0402	0.0455	0.0435	0.0456	0.0533	0.0563	0.0673	0.0821	0.0935	0.0981	0.1077	0.1085
	480	0.0351	0.0361	0.0382	0.0397	0.0405	0.0396	0.0388	0.0401	0.0406	0.0378	0.0397	0.0456	0.0442	0.0632	0.0497	0.0518	0.0614	0.065	0.0773	0.0734	0.0822	0.087	0.089	0.0873		480	0.0337	0.0402	0.0363	0.0392	0.0396	0.0389	0.0395	0.0383	0.0394	0.0407	0.0388	0.0435	0.0426	0.0428	0.0492	0.0497	0.0579	0.0674	0.0737	0.0756	0.0834	0.0819
	485	0.034	0.0346	0.034	0.0351	0.036	0.0355	0.0352	0.0353	0.0372	0.0354	0.036	0.0409	0.037	0.0552	0.0424	0.042	0.0498	0.0518	0.0579	0.0559	0.0612	0.0655	0.0652	0.0633		485	0.0325	0.0376	0.0347	0.0354	0.0358	0.0347	0.0362	0.0344	0.0357	0.0361	0.0355	0.0368	0.0374	0.0369	0.0425	0.0428	0.0485	0.0521	0.0556	0.0564	0.0615	0.0618
	490	0.0335	0.0345	0.0355	0.0364	0.0383	0.0354	0.0356	0.0365	0.0379	0.0353	0.0366	0.0417	0.0383	0.0557	0.0427	0.0403	0.0478	0.0471	0.0514	0.0487	0.0533	0.0553	0.0555	0.0545		490	0.0337	0.0377	0.0354	0.0364	0.0359	0.036	0.0374	0.0343	0.0376	0.0371	0.0351	0.037	0.038	0.0368	0.0418	0.0408	0.0453	0.0471	0.0493	0.0487	0.0534	0.053
	495	0.0344	0.0375	0.0369	0.0395	0.0396	0.0374	0.0379	0.0378	0.0393	0.0361	0.0372	0.0426	0.0405	0.0575	0.0413	0.0401	0.0468	0.0449	0.0479	0.0441	0.047	0.0487	0.0485	0.0488		495	0.0355	0.0399	0.0366	0.0382	0.0373	0.0377	0.0392	0.0373	0.0393	0.0388	0.0364	0.0392	0.0402	0.0375	0.0425	0.0408	0.0443	0.0457	0.0457	0.0452	0.0475	0.0469
	500	0.0356	0.0374	0.0377	0.0388	0.0391	0.0385	0.0376	0.038	0.0404	0.0368	0.038	0.0433	0.0401	0.0573	0.0408	0.0402	0.0448	0.0425	0.0449	0.0408	0.0443	0.0449	0.0443	0.0436		500	0.0345	0.0405	0.0368	0.0403	0.038	0.0375	0.0388	0.0372	0.0397	0.0386	0.0377	0.04	0.0395	0.0378	0.0429	0.04	0.0434	0.0432	0.0423	0.0415	0.0441	0.0433
	505	0.0347	0.0368	0.0355	0.0382	0.0387	0.0372	0.0364	0.0383	0.0392	0.0364	0.0383	0.0421	0.0397	0.0553	0.0398	0.0384	0.0431	0.0404	0.0409	0.038	0.0402	0.0401	0.0399	0.0401		505	0.0348	0.0399	0.0363	0.0387	0.0378	0.0364	0.0383	0.037	0.0377	0.039	0.0362	0.0392	0.0382	0.037	0.0413	0.0392	0.0414	0.0408	0.0399	0.0383	0.0401	0.0394
	510	0.0333	0.0361	0.0347	0.0357	0.0372	0.0365	0.0365	0.0367	0.0374	0.0345	0.0366	0.0411	0.0396	0.0544	0.0385	0.0373	0.0414	0.0382	0.0393	0.0352	0.0375	0.0372	0.0361	0.0379		510	0.0339	0.0376	0.0349	0.0363	0.0374	0.0353	0.0365	0.0358	0.0366	0.0376	0.0361	0.0392	0.0381	0.0364	0.0394	0.0375	0.0399	0.0384	0.0365	0.0356	0.0374	0.0372
	515	0.0342	0.0344	0.0349	0.0357	0.0356	0.0344	0.0339	0.0349	0.0366	0.035	0.035	0.0396	0.0376	0.0515	0.0369	0.0361	0.0396	0.0369	0.0355	0.0326	0.0344	0.035	0.0341	0.035		515	0.0341	0.0383	0.0342	0.0354	0.0345	0.0348	0.0355	0.0335	0.0356	0.0358	0.0348	0.0361	0.036	0.0342	0.0379	0.0354	0.0377	0.035	0.0343	0.0338	0.0348	0.0333
	520	0.0343	0.0349	0.0348	0.0363	0.0371	0.0353	0.0362	0.036	0.0368	0.0353	0.0352	0.0402	0.0378	0.0524	0.0381	0.0355	0.0396	0.0367	0.0353	0.0341	0.0355	0.036	0.0337	0.0336		520	0.0341	0.0391	0.0352	0.0362	0.035	0.0347	0.0363	0.0341	0.0358	0.0363	0.0347	0.0367	0.0368	0.0353	0.0386	0.038	0.0381	0.0354	0.0351	0.0334	0.0352	0.0347
	525	0.0342	0.0357	0.0367	0.0368	0.037	0.0361	0.0357	0.0365	0.0394	0.0371	0.0375	0.0429	0.0396	0.0536	0.0397	0.0373	0.0411	0.0383	0.0372	0.0356	0.0359	0.0369	0.0359	0.0357		525	0.0345	0.0394	0.0352	0.0372	0.0374	0.0366	0.0374	0.0367	0.0374	0.0379	0.0364	0.0387	0.0392	0.0364	0.0411	0.0375	0.0396	0.0381	0.0361	0.0352	0.0368	0.0367
	530	0.0323	0.0321	0.0307	0.0326	0.0333	0.0321	0.0323	0.0329	0.034	0.0327	0.0326	0.037	0.0336	0.0487	0.0351	0.0321	0.0354	0.0339	0.0321	0.0304	0.0321	0.0321	0.0308	0.0292		530	0.0312	0.0351	0.032	0.0329	0.032	0.0313	0.033	0.0328	0.033	0.0328	0.0317	0.0323	0.0333	0.031	0.0356	0.034	0.0345	0.0321	0.0318	0.0298	0.0305	0.0301
	535	0.0339	0.0352	0.0342	0.035	0.0357	0.0341	0.0344	0.0346	0.0359	0.0347	0.0341	0.0391	0.0365	0.0512	0.0363	0.0348	0.0381	0.0352	0.0332	0.0322	0.0332	0.0344	0.0324	0.0328		535	0.0342	0.038	0.034	0.0362	0.034	0.034	0.0344	0.0341	0.0348	0.0358	0.0339	0.0353	0.0361	0.0331	0.0375	0.036	0.0364	0.0346	0.0331	0.0321	0.0333	0.0323
	540	0.034	0.0371	0.0364	0.0369	0.037	0.0357	0.0361	0.0354	0.0381	0.0354	0.0371	0.0405	0.0387	0.0525	0.0378	0.0373	0.0401	0.0368	0.0371	0.0334	0.0338	0.0353	0.0336	0.0346		540	0.0339	0.0383	0.0347	0.0366	0.0359	0.0365	0.036	0.0356	0.0365	0.0372	0.0349	0.0379	0.0373	0.0358	0.0397	0.037	0.0388	0.0358	0.0348	0.0336	0.035	0.0341
	545	0.0337	0.0346	0.0341	0.0344	0.0348	0.0337	0.0349	0.0339	0.0368	0.0341	0.0348	0.039	0.0372	0.0512	0.0369	0.0345	0.0378	0.0358	0.0343	0.0326	0.0336	0.0336	0.0317	0.033		545	0.0334	0.0377	0.0346	0.0345	0.0345	0.0338	0.0353	0.0339	0.0356	0.035	0.0341	0.0362	0.0354	0.0336	0.0382	0.036	0.0366	0.034	0.033	0.0315	0.033	0.0334
	550	0.0344	0.0358	0.0358	0.0359	0.036	0.035	0.0349	0.0353	0.0369	0.0353	0.035	0.0396	0.0375	0.0508	0.0376	0.0353	0.0384	0.0375	0.0352	0.0328	0.0337	0.0343	0.0328	0.0331		550	0.0344	0.0384	0.035	0.0359	0.0348	0.0344	0.0366	0.0343	0.0373	0.0362	0.0341	0.0369	0.0358	0.0341	0.0392	0.0369	0.0374	0.0347	0.0338	0.0322	0.0336	0.033
	555	0.0343	0.0365	0.0359	0.0362	0.037	0.0353	0.0341	0.0355	0.037	0.0352	0.0354	0.0394	0.0386	0.0515	0.037	0.0358	0.0391	0.0361	0.0355	0.0326	0.0341	0.0341	0.0333	0.0339		555	0.0338	0.0386	0.0344	0.0365	0.0363	0.0359	0.0359	0.0341	0.0362	0.0354	0.035	0.0377	0.0375	0.0347	0.0401	0.0368	0.0372	0.0342	0.0341	0.0327	0.0339	0.0336
	560	0.0352	0.0368	0.0346	0.0357	0.0357	0.0353	0.035	0.0355	0.0369	0.0354	0.0356	0.0395	0.0372	0.0518	0.0377	0.0359	0.0385	0.0359	0.0345	0.0324	0.034	0.0346	0.0334	0.0338		560	0.0339	0.0392	0.035	0.0368	0.036	0.0359	0.0359	0.0347	0.0359	0.0367	0.0349	0.0371	0.0369	0.0346	0.0377	0.0375	0.0374	0.0351	0.0342	0.0325	0.0342	0.0334
	565	0.0337	0.0354	0.0346	0.0362	0.0358	0.0343	0.0345	0.0348	0.0368	0.0353	0.0354	0.04	0.038	0.0516	0.0385	0.0355	0.0391	0.0366	0.034	0.0327	0.0334	0.0343	0.0333	0.0331		565	0.0331	0.0379	0.0337	0.036	0.036	0.0348	0.0346	0.0348	0.0366	0.037	0.0347	0.0374	0.0364	0.0349	0.0392	0.0358	0.0372	0.0345	0.0332	0.0323	0.0335	0.0338
	570	0.0332	0.0363	0.0351	0.0354	0.0364	0.0347	0.0343	0.0338	0.0371	0.035	0.0353	0.0393	0.0377	0.0509	0.0377	0.0352	0.0384	0.0361	0.0353	0.0331	0.0341	0.0337	0.0334	0.0339		570	0.0331	0.037	0.0349	0.0358	0.0356	0.0358	0.0356	0.0354	0.036	0.0357	0.0352	0.0375	0.0363	0.0334	0.0388	0.0363	0.0381	0.0342	0.0337	0.0325	0.0343	0.034
	575	0.0341	0.0357	0.0338	0.0357	0.0365	0.0343	0.0347	0.035	0.0355	0.0344	0.0345	0.0388	0.0369	0.0503	0.0363	0.0348	0.0378	0.0363	0.0346	0.032	0.033	0.0345	0.0324	0.0331		575	0.0341	0.038	0.035	0.0344	0.0346	0.0344	0.0344	0.0348	0.0349	0.036	0.0338	0.0355	0.0363	0.0336	0.0384	0.036	0.0376	0.0338	0.0342	0.0322	0.0333	0.0333
	580	0.0354	0.0359	0.0353	0.0375	0.0368	0.0356	0.0348	0.0346	0.0365	0.0348	0.0353	0.0381	0.0375	0.0515	0.0363	0.0352	0.0364	0.0371	0.0344	0.0344	0.034	0.0349	0.0329	0.0343		580	0.0341	0.0386	0.035	0.0361	0.036	0.0347	0.0346	0.0356	0.0363	0.0354	0.0348	0.0358	0.0356	0.0333	0.0391	0.0369	0.0369	0.0347	0.0344	0.0327	0.0335	0.0332
	585	0.0355	0.0375	0.0368	0.0376	0.0376	0.0354	0.0358	0.0354	0.0391	0.0358	0.0367	0.0396	0.0373	0.0514	0.0374	0.0365	0.039	0.0358	0.0363	0.0332	0.0328	0.0357	0.0346	0.0348		585	0.0356	0.0402	0.0355	0.0368	0.0369	0.0372	0.0362	0.0365	0.037	0.0374	0.0351	0.0372	0.0372	0.0348	0.0404	0.0372	0.0392	0.0353	0.0356	0.0346	0.0364	0.0355
	590	0.0355	0.0367	0.036	0.0369	0.0367	0.0363	0.0361	0.0367	0.038	0.0356	0.0363	0.0391	0.0363	0.0524	0.0376	0.0359	0.0386	0.0352	0.0361	0.0347	0.0332	0.0357	0.0339	0.0343		590	0.0355	0.0393	0.0361	0.0372	0.0366	0.0362	0.0365	0.0366	0.0353	0.0369	0.0355	0.0372	0.0376	0.0342	0.0408	0.0392	0.039	0.0355	0.0348	0.0333	0.0344	0.0345
	595	0.0337	0.0358	0.0355	0.0365	0.0357	0.035	0.0349	0.0334	0.0375	0.0352	0.0361	0.0387	0.037	0.0512	0.0375	0.0358	0.038	0.0355	0.0362	0.0334	0.0321	0.0352	0.0343	0.0327		595	0.035	0.0385	0.0349	0.0358	0.0353	0.0353	0.0355	0.0346	0.0343	0.0361	0.0344	0.0372	0.0369	0.0336	0.039	0.037	0.0378	0.0352	0.0337	0.034	0.0351	0.0342
	600	0.0341	0.0352	0.0344	0.0349	0.0352	0.0348	0.0356	0.0338	0.0374	0.0352	0.0339	0.038	0.0368	0.051	0.0363	0.0349	0.0373	0.0346	0.036	0.0327	0.032	0.034	0.0317	0.0329		600	0.0332	0.0378	0.0352	0.0336	0.035	0.0347	0.0348	0.0334	0.0345	0.0346	0.0353	0.0368	0.034	0.0333	0.0383	0.037	0.0367	0.0344	0.033	0.0322	0.0333	0.0331
	605	0.0349	0.0368	0.0349	0.0358	0.0363	0.0356	0.0354	0.0348	0.0375	0.0356	0.0355	0.0387	0.0365	0.0517	0.0367	0.0349	0.0375	0.0358	0.0364	0.0337	0.0332	0.0354	0.0327	0.0342		605	0.0342	0.0391	0.0361	0.035	0.0366	0.0365	0.0364	0.0348	0.035	0.0354	0.035	0.0371	0.0357	0.0332	0.039	0.0376	0.0375	0.0355	0.034	0.0339	0.0342	0.0344
	610	0.0342	0.0355	0.0333	0.0348	0.0346	0.0356	0.0355	0.0352	0.0361	0.0338	0.0341	0.037	0.0352	0.0507	0.0368	0.0336	0.0365	0.0344	0.0342	0.0331	0.0326	0.033	0.0317	0.0325		610	0.0335	0.038	0.0353	0.0352	0.0358	0.0346	0.0356	0.0335	0.0348	0.0341	0.0348	0.036	0.0346	0.0325	0.038	0.0366	0.037	0.0351	0.0339	0.0327	0.0335	0.0324
	615	0.0344	0.037	0.0347	0.0356	0.0358	0.0355	0.0361	0.0347	0.0374	0.0349	0.0356	0.0393	0.0372	0.052	0.0374	0.0348	0.0372	0.0348	0.0362	0.034	0.0325	0.0345	0.033	0.0334		615	0.0342	0.0388	0.0354	0.0361	0.0377	0.0364	0.0357	0.0343	0.0358	0.0352	0.0362	0.0365	0.0364	0.0335	0.0389	0.0371	0.0374	0.0362	0.0343	0.0335	0.0343	0.0334
	620	0.0348	0.0371	0.0353	0.0363	0.0361	0.0357	0.0353	0.0343	0.0369	0.0349	0.035	0.0386	0.0384	0.0512	0.0352	0.0345	0.0373	0.0341	0.0356	0.0337	0.0329	0.0348	0.0339	0.0333		620	0.0355	0.0393	0.0355	0.035	0.0367	0.0357	0.0353	0.0347	0.035	0.035	0.0348	0.0364	0.0361	0.0335	0.0389	0.0361	0.037	0.0355	0.0342	0.0348	0.0351	0.0347
	625	0.0336	0.036	0.0357	0.0354	0.035	0.0349	0.0345	0.0338	0.0378	0.0344	0.0352	0.0379	0.0372	0.0506	0.0353	0.0331	0.0374	0.0342	0.0359	0.0326	0.0322	0.035	0.0324	0.0329		625	0.0336	0.0381	0.0359	0.0347	0.0352	0.0358	0.035	0.0343	0.0346	0.0357	0.0338	0.0368	0.0358	0.0332	0.0392	0.0357	0.0365	0.0351	0.0338	0.0337	0.0342	0.0332
	630	0.0329	0.0345	0.0319	0.0339	0.0327	0.0328	0.0338	0.0334	0.0354	0.0325	0.0339	0.0366	0.0348	0.0493	0.0347	0.0332	0.0356	0.0327	0.0334	0.0328	0.0323	0.0319	0.0316	0.032		630	0.0321	0.0366	0.0335	0.0338	0.0343	0.0337	0.0337	0.0333	0.032	0.0336	0.033	0.0347	0.0345	0.0313	0.0372	0.0348	0.0361	0.0348	0.0325	0.0318	0.0328	0.0325
	635	0.0328	0.0355	0.0341	0.0347	0.0341	0.0337	0.0343	0.0325	0.0364	0.033	0.0342	0.0369	0.0359	0.0501	0.0355	0.0326	0.0359	0.0342	0.0349	0.0332	0.0317	0.0341	0.0332	0.0332		635	0.0328	0.037	0.0343	0.0334	0.0343	0.0347	0.0338	0.0337	0.0339	0.0346	0.0338	0.0356	0.0346	0.0319	0.0372	0.0351	0.0361	0.034	0.0335	0.0337	0.0332	0.033
	640	0.0335	0.0357	0.0329	0.034	0.0341	0.0346	0.0349	0.0337	0.0362	0.0336	0.0348	0.038	0.0356	0.0503	0.0361	0.0344	0.0365	0.0343	0.0349	0.0329	0.0317	0.0331	0.0325	0.0331		640	0.0334	0.0378	0.0348	0.0338	0.0346	0.0339	0.035	0.0341	0.034	0.0339	0.034	0.0359	0.0344	0.0329	0.0376	0.0359	0.0359	0.0338	0.0343	0.0333	0.0329	0.0337
	645	0.0332	0.036	0.0344	0.0358	0.0345	0.0346	0.0353	0.0342	0.0364	0.0343	0.0355	0.0376	0.0356	0.0502	0.0351	0.0333	0.0372	0.0343	0.0345	0.0329	0.0322	0.034	0.0333	0.033		645	0.0331	0.0382	0.0348	0.0333	0.0347	0.0335	0.0344	0.0338	0.0338	0.0353	0.0336	0.0364	0.0352	0.0328	0.0374	0.0363	0.0362	0.035	0.0343	0.034	0.0341	0.0337
	650	0.0342	0.0354	0.034	0.0354	0.0347	0.0337	0.0339	0.0336	0.0366	0.0338	0.0348	0.0388	0.0374	0.0505	0.0348	0.0331	0.0371	0.0337	0.0352	0.0334	0.0329	0.0342	0.033	0.0342		650	0.0333	0.038	0.0351	0.0346	0.0369	0.034	0.0348	0.0346	0.0343	0.0348	0.0342	0.0365	0.0359	0.0329	0.0371	0.0364	0.0371	0.0351	0.0338	0.0341	0.0338	0.0347
	655	0.0317	0.0331	0.0331	0.0329	0.0328	0.0325	0.0325	0.0319	0.0339	0.0318	0.0337	0.0372	0.0345	0.0475	0.0334	0.032	0.0348	0.0327	0.0328	0.0315	0.0316	0.0318	0.0313	0.032		655	0.0306	0.0364	0.0329	0.0313	0.0324	0.0321	0.0326	0.0318	0.0312	0.0325	0.032	0.0344	0.0346	0.0313	0.0357	0.0334	0.0351	0.0337	0.0323	0.0318	0.0323	0.0327
	660	0.0313	0.033	0.0311	0.0319	0.0316	0.0335	0.0327	0.032	0.0334	0.032	0.0332	0.0357	0.0334	0.0476	0.0344	0.0321	0.035	0.0324	0.0321	0.0306	0.0308	0.0323	0.0303	0.0316		660	0.031	0.0352	0.0326	0.0311	0.0333	0.0313	0.0324	0.0313	0.0315	0.032	0.0324	0.0339	0.0339	0.0317	0.0359	0.0322	0.0342	0.0335	0.032	0.0314	0.0318	0.0324
	665	0.0332	0.0346	0.0326	0.0342	0.0335	0.0343	0.0345	0.0343	0.0346	0.0333	0.0343	0.0373	0.035	0.0492	0.0357	0.0336	0.0371	0.0341	0.0335	0.0324	0.0319	0.033	0.0323	0.0325		665	0.0328	0.0368	0.0335	0.0325	0.0354	0.0329	0.0346	0.0322	0.0324	0.0339	0.0338	0.0359	0.0338	0.0319	0.0374	0.0348	0.0364	0.0348	0.0327	0.0326	0.0328	0.033
	670	0.0327	0.0336	0.0327	0.0341	0.0347	0.0338	0.034	0.0326	0.0355	0.0332	0.0329	0.0383	0.0364	0.0492	0.0347	0.0336	0.0371	0.035	0.0337	0.0323	0.0317	0.0341	0.0335	0.0333		670	0.0317	0.0374	0.0333	0.0333	0.0349	0.0334	0.0341	0.0332	0.0329	0.033	0.0342	0.0354	0.034	0.0324	0.0373	0.0345	0.037	0.0338	0.033	0.033	0.0333	0.0345
	675	0.0311	0.0336	0.0313	0.0326	0.0328	0.032	0.0333	0.0323	0.0346	0.0329	0.0336	0.0371	0.0346	0.0496	0.0345	0.0331	0.0355	0.0332	0.0335	0.0319	0.0311	0.0332	0.0323	0.0323		675	0.0322	0.0353	0.0335	0.0323	0.0328	0.0318	0.033	0.0321	0.0332	0.0326	0.0324	0.0349	0.0339	0.0319	0.0361	0.0342	0.0365	0.0333	0.033	0.0323	0.0326	0.0324
	680	0.0314	0.0324	0.0308	0.0317	0.0329	0.0329	0.0337	0.0327	0.035	0.0326	0.0336	0.0371	0.0355	0.0484	0.0355	0.033	0.0359	0.0338	0.0345	0.0324	0.0317	0.0333	0.033	0.0332		680	0.0319	0.0374	0.0324	0.0322	0.0336	0.0341	0.0326	0.0324	0.0317	0.0334	0.0334	0.035	0.0343	0.0329	0.0363	0.0345	0.0357	0.0345	0.0327	0.0329	0.0333	0.0337
	685	0.033	0.0334	0.0331	0.0334	0.0352	0.0344	0.0346	0.0332	0.0358	0.0344	0.0348	0.0372	0.0353	0.0496	0.0366	0.0348	0.0385	0.0337	0.0344	0.033	0.032	0.0333	0.0324	0.0336		685	0.0328	0.0358	0.0332	0.0333	0.0344	0.0332	0.0344	0.0325	0.0329	0.0339	0.0338	0.0346	0.0355	0.0337	0.0369	0.0361	0.0361	0.0348	0.034	0.0327	0.0334	0.0331
	690	0.0308	0.0335	0.0325	0.0327	0.0338	0.0341	0.033	0.0326	0.0345	0.0342	0.0345	0.039	0.0357	0.0484	0.0349	0.034	0.037	0.0332	0.0334	0.0323	0.0328	0.0339	0.0328	0.0324		690	0.0313	0.0357	0.0333	0.0313	0.0353	0.0325	0.0334	0.0337	0.0332	0.0345	0.0346	0.0359	0.0344	0.0325	0.0364	0.0346	0.0355	0.0351	0.0329	0.0332	0.0338	0.0336
	695	0.033	0.0333	0.0314	0.0323	0.0346	0.034	0.0338	0.0327	0.0342	0.0349	0.034	0.0381	0.0364	0.0498	0.0352	0.0319	0.0382	0.0346	0.0346	0.0331	0.032	0.0336	0.0326	0.0333		695	0.0314	0.0358	0.034	0.0334	0.0345	0.0329	0.0334	0.0326	0.0332	0.0354	0.0348	0.0353	0.0348	0.0334	0.0366	0.0355	0.0367	0.0347	0.0336	0.0331	0.0337	0.0339
	700	0.0311	0.0321	0.0289	0.031	0.0328	0.0315	0.0326	0.0315	0.0318	0.0313	0.0313	0.0342	0.0315	0.0479	0.0334	0.0324	0.0343	0.0327	0.0321	0.0307	0.0306	0.0332	0.0306	0.0315		700	0.0305	0.0341	0.0319	0.0303	0.0317	0.0317	0.033	0.0311	0.0304	0.0317	0.0323	0.032	0.0331	0.0314	0.0354	0.0335	0.0333	0.0332	0.0304	0.0313	0.0324	0.0325
	705	0.0327	0.0328	0.0296	0.0321	0.0328	0.0327	0.0332	0.0327	0.0339	0.0311	0.0331	0.0353	0.0326	0.0491	0.0336	0.0328	0.0348	0.034	0.032	0.0322	0.031	0.0321	0.0307	0.0313		705	0.0317	0.0353	0.0333	0.0319	0.0331	0.0317	0.0335	0.0316	0.032	0.0314	0.0318	0.0339	0.0324	0.0313	0.0355	0.0345	0.0348	0.0337	0.0317	0.0317	0.0324	0.0326
	710	0.0322	0.0339	0.0317	0.033	0.0343	0.0344	0.0341	0.0334	0.0353	0.0343	0.035	0.0371	0.0363	0.049	0.0357	0.0342	0.0376	0.0339	0.035	0.0325	0.0332	0.0337	0.0333	0.0338		710	0.0314	0.0369	0.0346	0.034	0.0356	0.0331	0.0344	0.0332	0.033	0.035	0.0343	0.0362	0.0351	0.033	0.0372	0.0355	0.036	0.035	0.0338	0.0331	0.0343	0.0341
	715	0.0337	0.0354	0.0344	0.0352	0.0383	0.0372	0.0362	0.036	0.0366	0.0367	0.0371	0.0389	0.0382	0.0504	0.0372	0.0362	0.0392	0.0359	0.0369	0.0348	0.0336	0.0356	0.0359	0.0363		715	0.0326	0.0374	0.0354	0.0352	0.0375	0.0357	0.0358	0.0356	0.0357	0.0373	0.0375	0.0385	0.0378	0.036	0.0391	0.0376	0.0389	0.0374	0.0362	0.0356	0.0361	0.0363
	720	0.0338	0.0363	0.0337	0.0347	0.036	0.0368	0.0358	0.035	0.0385	0.0354	0.0365	0.0386	0.037	0.0511	0.0371	0.0347	0.0386	0.0365	0.0366	0.0345	0.0344	0.0354	0.0355	0.0363		720	0.0339	0.038	0.0362	0.0347	0.0364	0.0357	0.0368	0.0362	0.0341	0.0375	0.036	0.0382	0.0371	0.0357	0.0383	0.0374	0.0383	0.0371	0.0348	0.0353	0.0369	0.0358
	725	0.0342	0.0362	0.0348	0.0355	0.0368	0.0377	0.0354	0.0357	0.0361	0.0369	0.0366	0.0391	0.0378	0.0519	0.0374	0.0361	0.039	0.0356	0.0363	0.0356	0.0347	0.0361	0.0357	0.036		725	0.0345	0.039	0.0354	0.0356	0.0377	0.0356	0.0371	0.0368	0.0357	0.037	0.0372	0.038	0.0364	0.0358	0.0397	0.0373	0.0388	0.0368	0.0358	0.0361	0.0367	0.0361
	730	0.0359	0.0362	0.0353	0.0365	0.038	0.0387	0.0384	0.0361	0.0374	0.0385	0.0379	0.0406	0.039	0.0536	0.0403	0.0377	0.0415	0.0385	0.038	0.0369	0.0362	0.0379	0.0377	0.0371		730	0.0367	0.04	0.0378	0.0367	0.0389	0.0364	0.0375	0.0364	0.0358	0.0386	0.037	0.0382	0.0388	0.0365	0.0408	0.0405	0.0394	0.0387	0.0373	0.0373	0.0383	0.0373
	735	0.0368	0.0369	0.0358	0.0362	0.038	0.0378	0.0389	0.0371	0.0372	0.0385	0.037	0.0417	0.0384	0.0553	0.0401	0.0383	0.0404	0.0382	0.0392	0.0375	0.0362	0.039	0.0367	0.0372		735	0.0362	0.04	0.0383	0.0363	0.0393	0.0371	0.0379	0.0362	0.0366	0.0381	0.0378	0.0397	0.0387	0.0375	0.0413	0.0402	0.0398	0.0396	0.0384	0.0385	0.0384	0.0383
	740	0.0382	0.0375	0.0363	0.0371	0.0383	0.0393	0.0402	0.0382	0.0387	0.0393	0.0392	0.0429	0.0397	0.0557	0.0405	0.0396	0.0421	0.04	0.0404	0.038	0.0377	0.0387	0.0378	0.039		740	0.0383	0.042	0.0395	0.0375	0.04	0.0382	0.0392	0.0381	0.0382	0.0392	0.0387	0.0402	0.0406	0.0383	0.0414	0.0414	0.0424	0.0407	0.0395	0.0393	0.0388	0.0397
	745	0.0392	0.0391	0.037	0.0391	0.0401	0.0407	0.0403	0.0393	0.041	0.04	0.0403	0.0439	0.0411	0.0563	0.0407	0.0406	0.0433	0.0415	0.0405	0.039	0.0384	0.0405	0.0402	0.039		745	0.0398	0.0439	0.04	0.0384	0.0412	0.0398	0.0405	0.0384	0.0378	0.0405	0.041	0.0421	0.0416	0.0412	0.0423	0.0412	0.0431	0.0415	0.0395	0.0402	0.0406	0.0405
	750	0.0387	0.0391	0.0372	0.0397	0.0411	0.0413	0.0411	0.0394	0.0401	0.0401	0.0407	0.0435	0.0407	0.0568	0.0419	0.0408	0.0435	0.0407	0.0405	0.04	0.0393	0.0408	0.0398	0.0401		750	0.0392	0.0431	0.0405	0.0396	0.0414	0.0395	0.0407	0.0392	0.0386	0.0412	0.0414	0.0429	0.041	0.0399	0.0428	0.0421	0.0437	0.0412	0.0403	0.0402	0.0403	0.0418
	755	0.0375	0.0387	0.0371	0.0388	0.0396	0.0405	0.0409	0.0388	0.0387	0.0399	0.041	0.0426	0.0415	0.056	0.0416	0.04	0.0426	0.0401	0.0398	0.0401	0.0374	0.041	0.0398	0.0404		755	0.0388	0.0422	0.0396	0.0386	0.0404	0.0393	0.0411	0.0393	0.0375	0.0406	0.0401	0.0414	0.0413	0.0392	0.0427	0.0429	0.0423	0.0412	0.0401	0.0398	0.0407	0.0413
	760	0.0387	0.0402	0.0384	0.0402	0.041	0.0416	0.0419	0.0407	0.0399	0.041	0.0416	0.0437	0.0409	0.0574	0.043	0.0411	0.044	0.0413	0.0412	0.04	0.04	0.0413	0.0403	0.041		760	0.04	0.0436	0.041	0.0397	0.0414	0.0404	0.0411	0.0403	0.0386	0.0416	0.0413	0.043	0.0422	0.0411	0.0448	0.0437	0.043	0.0428	0.0423	0.0415	0.0411	0.0425
	765	0.0378	0.0383	0.0362	0.0384	0.0396	0.0416	0.0405	0.0384	0.0381	0.0401	0.0392	0.0425	0.0407	0.0569	0.0412	0.0399	0.0427	0.0397	0.0413	0.0391	0.037	0.0408	0.0391	0.0398		765	0.0385	0.0423	0.0398	0.0381	0.0401	0.0389	0.0392	0.0385	0.0381	0.0408	0.0404	0.0421	0.0413	0.0397	0.0423	0.0409	0.0418	0.041	0.0396	0.0399	0.0407	0.0403
	770	0.0389	0.0383	0.0364	0.038	0.0395	0.0391	0.0391	0.0387	0.0377	0.0394	0.0389	0.0411	0.0402	0.0559	0.041	0.0398	0.0411	0.0403	0.0395	0.0376	0.0365	0.0407	0.0387	0.0396		770	0.038	0.0409	0.0391	0.0385	0.0385	0.0386	0.0394	0.0382	0.0373	0.0406	0.0383	0.0402	0.0407	0.0401	0.0413	0.0415	0.0427	0.0398	0.0393	0.0392	0.0392	0.0398
	775	0.0374	0.0395	0.0369	0.0387	0.0404	0.0406	0.0402	0.0389	0.0397	0.0411	0.0403	0.0425	0.0424	0.0566	0.0413	0.0411	0.0423	0.0421	0.0411	0.0399	0.0382	0.0425	0.0406	0.0401		775	0.0388	0.0425	0.0405	0.0385	0.0405	0.0395	0.0414	0.0391	0.0376	0.0413	0.0401	0.0429	0.0419	0.0415	0.0424	0.042	0.0419	0.0413	0.0409	0.0411	0.0407	0.0412
	780	0.0358	0.0382	0.0363	0.0381	0.0382	0.0384	0.0403	0.0385	0.0382	0.0394	0.0385	0.0412	0.0398	0.0544	0.0409	0.0413	0.0403	0.0394	0.0398	0.0382	0.037	0.0407	0.0382	0.0408		780	0.0382	0.0408	0.0374	0.0386	0.0392	0.0377	0.04	0.0378	0.0373	0.0399	0.0383	0.0413	0.0407	0.0393	0.0413	0.0402	0.041	0.0403	0.04	0.0396	0.0397	0.0416
	785	0.037	0.0388	0.0365	0.0383	0.0397	0.0399	0.0409	0.0397	0.0388	0.04	0.0399	0.0432	0.0408	0.0567	0.0414	0.0412	0.0424	0.0403	0.0412	0.0399	0.0379	0.0409	0.0398	0.0403		785	0.0373	0.0419	0.0397	0.0389	0.0404	0.0397	0.0405	0.0392	0.0383	0.0416	0.0391	0.0414	0.0409	0.0409	0.0422	0.0415	0.0411	0.0409	0.0393	0.0409	0.0401	0.041
	790	0.0367	0.0383	0.0354	0.0369	0.0389	0.039	0.0396	0.0372	0.0372	0.0382	0.0394	0.0402	0.0391	0.0559	0.0415	0.039	0.0399	0.0393	0.0396	0.0388	0.0361	0.0392	0.0384	0.039		790	0.0377	0.041	0.0385	0.0377	0.0395	0.0372	0.0389	0.0378	0.0363	0.0404	0.0383	0.0408	0.0395	0.0394	0.0411	0.04	0.0405	0.0393	0.0389	0.0393	0.0394	0.0394
	795	0.0353	0.0369	0.0358	0.037	0.0385	0.039	0.0395	0.0375	0.0377	0.0393	0.0391	0.0405	0.039	0.0554	0.0418	0.0399	0.0415	0.038	0.0392	0.0384	0.0365	0.04	0.0392	0.0394		795	0.0369	0.0416	0.0378	0.0369	0.0395	0.037	0.0395	0.0385	0.0364	0.0404	0.0386	0.0402	0.0399	0.0396	0.0407	0.0402	0.0408	0.0405	0.0396	0.039	0.0394	0.0396
	800	0.0365	0.0371	0.0347	0.0366	0.039	0.039	0.04	0.0375	0.0366	0.0393	0.0392	0.0396	0.0406	0.0547	0.0406	0.0406	0.0412	0.0388	0.0399	0.0391	0.0366	0.0396	0.0382	0.0392		800	0.0378	0.0409	0.0381	0.0371	0.042	0.0384	0.0392	0.0377	0.037	0.0399	0.0398	0.0405	0.04	0.0395	0.0412	0.0409	0.0414	0.0415	0.0401	0.0398	0.0397	0.0402
[truncated: 27 more columns]

## Sheet: Figure S1_18_mM
	Aluminum Chelation, Run 1																										Aluminum Chelation, Run 2
	Blank = 295 μL Water + 5 μL DMSO																										Blank = 295 μL Water + 5 μL DMSO
	[Al3+] (µM)	Blank	0	0.00762939	0.0152588	0.0305176	0.0610352	0.12207	0.244141	0.488281	0.976562	1.95312	3.90625	7.8125	15.625	31.25	62.5	125	250	500	1000	2000	4000	8000	16000		[Al3+] (µM)	Blank	0	0.00762939	0.0152588	0.0305176	0.0610352	0.12207	0.244141	0.488281	0.976562	1.95312	3.90625	7.8125	15.625	31.25	62.5	125	250	500	1000	2000	4000
	Wavelength (nm)	Absorbance																									Wavelength (nm)	Absorbance
	300	0.3444	2.725	2.7296	2.6635	2.6858	2.6825	2.6668	2.6621	2.6614	2.6884	2.7053	2.6838	2.6421	2.7194	2.7018	2.7213	2.7002	2.7302	2.6723	2.6661	2.6324	2.5753	2.4813	2.5055		300	0.3494	2.7163	2.659	2.6365	2.6886	2.6825	2.7441	2.6156	2.7624	2.7243	2.7114	2.677	2.6709	2.6845	2.7803	2.6687	2.6625	2.5997	2.604	2.5379	2.5368	2.5429
	305	0.2019	2.6566	2.6537	2.5951	2.6237	2.6136	2.6	2.6098	2.5932	2.6171	2.6276	2.6138	2.56	2.6333	2.604	2.6091	2.5469	2.5501	2.4648	2.4215	2.359	2.2848	2.1808	2.2012		305	0.2075	2.6327	2.5951	2.5674	2.6188	2.611	2.6775	2.545	2.6954	2.6555	2.6386	2.6121	2.5943	2.5924	2.6851	2.5584	2.5178	2.4205	2.3895	2.3002	2.2679	2.2533
	310	0.1457	2.6856	2.7034	2.633	2.6716	2.6558	2.6422	2.6503	2.6374	2.6626	2.6599	2.6524	2.5985	2.6493	2.6078	2.5751	2.4623	2.4131	2.2713	2.1764	2.0665	1.9678	1.8517	1.8501		310	0.1479	2.6786	2.6342	2.612	2.6673	2.6504	2.7218	2.5838	2.7378	2.7004	2.682	2.6469	2.6247	2.6085	2.6871	2.5327	2.4332	2.2797	2.1983	2.0613	1.9866	1.936
	315	0.1272	2.7863	2.7917	2.7192	2.7554	2.7436	2.7242	2.7404	2.7181	2.7469	2.7438	2.7363	2.6594	2.7134	2.6484	2.601	2.4524	2.3781	2.2016	2.0772	1.9435	1.8301	1.6987	1.6859		315	0.128	2.7664	2.7158	2.6969	2.7506	2.7366	2.8123	2.66	2.8307	2.7836	2.7616	2.735	2.6966	2.6716	2.7321	2.5574	2.4268	2.2406	2.1291	1.9628	1.8641	1.7985
	320	0.1118	2.9246	2.9352	2.8577	2.898	2.8907	2.8596	2.862	2.8689	2.8925	2.8882	2.8768	2.8111	2.8481	2.7637	2.6837	2.5289	2.4466	2.2509	2.1113	1.9626	1.8417	1.7016	1.6781		320	0.113	2.9059	2.8555	2.8489	2.8927	2.8783	2.9615	2.81	2.9771	2.9253	2.9149	2.879	2.8298	2.8087	2.8599	2.6594	2.5089	2.3005	2.175	1.9937	1.8829	1.8099
	325	0.0986	3.1398	3.1478	3.0553	3.1118	3.0812	3.0622	3.0958	3.0795	3.0956	3.1027	3.0895	3.0229	3.0521	2.9709	2.8949	2.7114	2.6221	2.4168	2.2694	2.1129	1.98	1.8265	1.7951		325	0.1	3.1033	3.0618	3.0341	3.1189	3.092	3.1726	3.0131	3.146	3.1532	3.1279	3.0758	3.0407	3.0039	3.0724	2.8501	2.6896	2.4664	2.3371	2.1461	2.0247	1.9482
	330	0.0887	3.346	3.3584	3.2888	3.3178	3.308	3.2662	3.2911	3.2706	3.3048	3.3324	3.2929	3.2356	3.2573	3.1974	3.1052	2.9202	2.8378	2.619	2.4713	2.3122	2.1637	1.9915	1.9504		330	0.0899	3.3174	3.2916	3.2731	3.3197	3.2875	3.3695	3.2237	3.4177	3.3854	3.335	3.3134	3.2467	3.2259	3.2987	3.0644	2.8998	2.6659	2.5341	2.3375	2.2136	2.1304
	335	0.0804	3.6032	3.5864	3.5344	3.5653	3.5439	3.5264	3.4604	3.5501	3.532	3.5089	3.4975	3.4281	3.5312	3.4172	3.3539	3.1864	3.1158	2.8864	2.7408	2.583	2.4052	2.2096	2.1506		335	0.0807	3.5687	3.5179	3.4837	3.5429	3.5155	3.5199	3.4748	3.6466	3.6854	3.58	3.5601	3.508	3.4656	3.5521	3.3122	3.1672	2.925	2.8082	2.5968	2.4621	2.3737
	340	0.0706	3.7076	3.6998	3.6411	3.7966	3.5894	3.6933	3.5782	3.6955	3.7043	3.65	3.6172	3.6927	3.6604	3.5993	3.5246	3.4183	3.321	3.1259	2.9729	2.8115	2.623	2.4089	2.3281		340	0.0708	3.6947	3.6306	3.6255	3.6351	3.6983	3.6479	3.6181	3.7788	3.7667	3.7298	3.6543	3.6866	3.5868	3.6025	3.471	3.3776	3.153	3.032	2.8171	2.6831	2.5901
	345	0.0638	3.8085	3.8209	3.8089	3.8972	3.6639	3.7597	3.644	3.7418	3.8331	3.7863	3.6096	3.7693	3.7742	3.7047	3.6444	3.6222	3.5016	3.3029	3.169	3.0482	2.8185	2.5972	2.501		345	0.064	3.815	3.7453	3.7559	3.6717	3.8216	3.6566	3.7161	3.8732	3.795	3.7587	3.6802	3.828	3.6657	3.7371	3.5772	3.4159	3.331	3.2151	3.0295	2.8831	2.7948
	350	0.059	3.726	3.8205	3.7497	3.925	3.6805	3.7798	3.6578	3.775	3.8164	3.7622	3.7115	3.8532	3.7772	3.7342	3.642	3.7139	3.6066	3.4075	3.2997	3.1945	2.9755	2.7402	2.6393		350	0.0591	3.7995	3.7096	3.7622	3.6563	3.797	3.672	3.7332	3.902	3.8305	3.8636	3.6515	3.8039	3.7031	3.7389	3.6221	3.7082	3.4455	3.3268	3.1618	3.0302	2.9499
	355	0.0559	3.5601	3.6326	3.5971	3.9891	3.4076	3.4725	3.53	3.4866	3.7149	3.5434	3.4884	3.623	3.5613	3.6853	3.411	3.4933	3.5536	3.3437	3.2663	3.2084	2.9842	2.827	2.7482		355	0.0561	3.6314	3.5655	3.6073	3.4434	3.5312	3.6133	3.8451	3.6903	3.5387	3.6298	3.4578	3.5397	3.6273	3.2235	3.4576	3.5186	3.3831	3.0926	3.192	3.0832	2.9718
	360	0.0508	3.479	3.5725	3.475	3.5416	3.5069	3.5489	3.5313	3.7289	3.539	3.5999	3.606	3.6929	3.5305	3.5735	3.3913	3.5249	3.5149	3.3395	3.2755	3.2334	3.0918	2.9132	2.8294		360	0.0512	3.6393	3.4791	3.4959	3.5371	3.3643	3.5071	3.4555	3.5046	3.5862	3.5988	3.4355	3.5459	3.5992	3.4908	3.5206	3.511	3.3546	3.2921	3.1808	3.1318	3.0307
	365	0.0489	3.5508	3.4917	3.6196	3.4923	3.4313	3.4407	3.4527	3.5196	3.5094	3.5576	3.4486	3.614	3.4792	3.4858	3.4297	3.5017	3.5081	3.3019	3.2843	3.2674	3.1088	2.9566	2.8874		365	0.0493	3.525	3.4661	3.5714	3.4541	3.478	3.4879	3.4756	3.5058	3.6112	3.4773	3.4427	3.4455	3.4737	3.4703	3.433	3.4566	3.3191	3.3055	3.1697	3.1113	3.0786
	370	0.0467	3.417	3.3655	3.3733	3.3821	3.2882	3.3286	3.2861	3.362	3.3104	3.3892	3.2868	3.3764	3.4121	3.2364	3.3745	3.3684	3.3405	3.2182	3.2537	3.2252	3.0835	2.9937	2.9971		370	0.0474	3.3959	3.3548	3.3243	3.3092	3.2951	3.3328	3.2712	3.3761	3.4633	3.3385	3.3213	3.3464	3.3117	3.3496	3.2902	3.3345	3.1868	3.2798	3.1453	3.1019	3.1059
	375	0.0459	3.0893	3.0846	3.0259	3.0702	2.9879	3.014	2.9753	3.0142	3.0317	3.0368	3.0007	2.9811	3.1124	3.0562	3.0786	3.1584	3.2156	3.1857	3.2311	3.2881	3.1166	3.0795	3.0424		375	0.0448	3.0569	3.0181	2.9718	3.0064	3.01	3.0409	2.9505	3.0852	3.0987	3.0451	3.0357	3.0366	3.0992	3.1271	3.152	3.0969	3.1134	3.1612	3.0939	3.1203	3.1345
	380	0.0424	2.6171	2.6183	2.5546	2.5708	2.5461	2.5302	2.543	2.5379	2.5681	2.571	2.5945	2.5373	2.6426	2.704	2.8051	2.9377	3.0686	3.1484	3.1949	3.308	3.1977	3.1888	3.1481		380	0.0426	2.6003	2.5468	2.5161	2.5508	2.5379	2.5962	2.4795	2.6466	2.5948	2.5851	2.5682	2.564	2.5933	2.7743	2.7574	2.8809	2.9681	3.0555	3.1146	3.2089	3.2209
	385	0.0426	2.1053	2.103	2.0389	2.0457	2.0457	2.0207	2.0374	2.0257	2.0623	2.0638	2.0852	2.0647	2.1761	2.2823	2.4692	2.6779	2.9163	3.0536	3.1622	3.3306	3.268	3.2633	3.2859		385	0.0429	2.0874	2.0396	2	2.0392	2.0282	2.092	1.9843	2.1192	2.0886	2.0918	2.0801	2.0893	2.1474	2.3595	2.4329	2.6311	2.8048	3.0041	3.1172	3.1691	3.2405
	390	0.0415	1.6063	1.5967	1.5503	1.5561	1.5674	1.5387	1.5557	1.5507	1.5768	1.5842	1.6127	1.6142	1.7427	1.8842	2.1322	2.4205	2.754	3.0048	3.1755	3.3815	3.3202	3.3579	3.386		390	0.041	1.5946	1.5478	1.5195	1.5594	1.5457	1.5998	1.5108	1.6196	1.5977	1.6049	1.6051	1.633	1.7153	1.9403	2.1007	2.3838	2.6383	2.9358	3.1187	3.2348	3.3044
	395	0.0408	1.1486	1.1415	1.11	1.1117	1.1223	1.1027	1.115	1.1115	1.1359	1.1473	1.1793	1.2017	1.3347	1.5125	1.8081	2.1633	2.5736	2.9044	3.1467	3.359	3.3485	3.4132	3.4431		395	0.0407	1.1413	1.1066	1.0838	1.1177	1.1043	1.1468	1.0824	1.164	1.1523	1.162	1.174	1.2174	1.3159	1.5577	1.7793	2.1323	2.4699	2.8524	3.0813	3.2414	3.3387
	400	0.0412	0.8006	0.7933	0.7705	0.774	0.7822	0.7643	0.7763	0.7744	0.7997	0.8119	0.8423	0.884	1.0161	1.2141	1.5346	1.9294	2.3896	2.791	3.0777	3.3629	3.3264	3.4358	3.4308		400	0.0414	0.7982	0.7679	0.7519	0.778	0.7698	0.7992	0.7551	0.8133	0.807	0.8211	0.8416	0.8955	1.0019	1.2511	1.5065	1.9052	2.2937	2.7411	3.0317	3.2193	3.3366
	405	0.0396	0.5234	0.5167	0.5037	0.5049	0.5131	0.5003	0.5095	0.5081	0.5295	0.5416	0.5776	0.6276	0.7554	0.9591	1.2855	1.6989	2.1705	2.621	2.9847	3.2402	3.299	3.503	3.4072		405	0.0384	0.5213	0.5	0.4897	0.51	0.5047	0.5233	0.4935	0.5331	0.5349	0.5504	0.5736	0.6364	0.7475	0.9884	1.2609	1.6746	2.0941	2.5763	2.9209	3.1045	3.3281
	410	0.0381	0.3564	0.3487	0.3414	0.3429	0.3513	0.3397	0.3462	0.3468	0.3635	0.3767	0.4098	0.4682	0.5872	0.7834	1.1016	1.5071	1.9663	2.4341	2.8147	3.2059	3.2404	3.4385	3.4148		410	0.039	0.3532	0.3372	0.3301	0.347	0.3431	0.3546	0.3347	0.364	0.3665	0.3811	0.4076	0.4716	0.5806	0.8067	1.0806	1.4849	1.9004	2.3892	2.7738	3.0573	3.2846
	415	0.0389	0.2273	0.2196	0.2152	0.2155	0.2241	0.2152	0.219	0.2223	0.2354	0.2475	0.2778	0.3344	0.4413	0.6227	0.9129	1.2906	1.7137	2.1657	2.5565	2.9835	3.1462	3.3124	3.45		415	0.038	0.2257	0.2135	0.2065	0.2206	0.2174	0.2254	0.2121	0.2326	0.2371	0.2514	0.276	0.3371	0.4357	0.6408	0.8947	1.2667	1.6595	2.1259	2.5286	2.8596	3.1498
	420	0.0362	0.142	0.1361	0.1343	0.1349	0.143	0.1343	0.1376	0.1405	0.151	0.1628	0.1891	0.2407	0.3312	0.4866	0.7384	1.0661	1.4331	1.8422	2.2286	2.6884	2.9672	3.2123	3.3379		420	0.0364	0.1406	0.1328	0.1294	0.1398	0.1372	0.14	0.134	0.1465	0.1516	0.1641	0.1877	0.2429	0.3282	0.5017	0.7233	1.0463	1.3896	1.8102	2.1963	2.5626	2.9419
	425	0.0376	0.1012	0.096	0.0956	0.0979	0.1053	0.0986	0.0999	0.1025	0.1114	0.1193	0.1425	0.1889	0.2658	0.3983	0.6133	0.8985	1.2108	1.574	1.9359	2.3916	2.6795	2.9906	3.2863		425	0.0357	0.0999	0.0947	0.0938	0.103	0.1001	0.1003	0.0971	0.1056	0.1112	0.1213	0.142	0.189	0.262	0.4096	0.6006	0.8786	1.1771	1.5509	1.9162	2.2768	2.6756
	430	0.038	0.0788	0.0732	0.0745	0.0749	0.0824	0.0757	0.0769	0.0794	0.0864	0.0933	0.1122	0.1522	0.2134	0.3236	0.5012	0.7455	1.0078	1.322	1.6496	2.0825	2.3934	2.7514	3.1208		430	0.0373	0.077	0.0729	0.0711	0.0796	0.078	0.0773	0.0744	0.081	0.0858	0.0951	0.1109	0.152	0.2117	0.3313	0.4902	0.7246	0.9788	1.3043	1.6373	1.9865	2.4025
	435	0.0383	0.0627	0.0575	0.0605	0.0583	0.0654	0.0591	0.0601	0.0628	0.0678	0.0727	0.0869	0.1194	0.1657	0.2482	0.386	0.5823	0.788	1.0468	1.3294	1.7304	2.0362	2.4088	2.8429		435	0.0389	0.0618	0.0582	0.055	0.0624	0.0603	0.0607	0.0592	0.0621	0.0667	0.0753	0.0863	0.1181	0.1633	0.2551	0.3779	0.5638	0.768	1.0345	1.3298	1.6478	2.0445
	440	0.0368	0.0515	0.0474	0.0493	0.0483	0.0549	0.0489	0.0493	0.0512	0.0559	0.0583	0.0698	0.0934	0.127	0.1877	0.2931	0.4434	0.5992	0.8096	1.0459	1.3978	1.6836	2.0428	2.4879		440	0.036	0.0499	0.0474	0.0465	0.0532	0.0509	0.0497	0.0488	0.0514	0.0545	0.0605	0.069	0.0925	0.1253	0.1926	0.2869	0.4268	0.5871	0.7999	1.0525	1.3357	1.6945
	445	0.0361	0.0447	0.0425	0.0441	0.0434	0.0498	0.0436	0.0443	0.0454	0.049	0.05	0.0588	0.0758	0.1008	0.1438	0.2223	0.338	0.4557	0.6233	0.8198	1.12	1.3737	1.6997	2.1035		445	0.0349	0.0445	0.0424	0.0415	0.0481	0.0451	0.044	0.0438	0.0462	0.0473	0.053	0.0577	0.0761	0.0988	0.1478	0.2168	0.3232	0.4474	0.6177	0.8298	1.0693	1.3828
	450	0.0353	0.0426	0.0395	0.0419	0.0421	0.0476	0.0419	0.042	0.0431	0.0453	0.0446	0.051	0.0653	0.0819	0.1127	0.1718	0.259	0.3461	0.4791	0.6392	0.8905	1.1042	1.3832	1.7343		450	0.0356	0.0417	0.0402	0.0399	0.0454	0.0439	0.0412	0.0411	0.043	0.0442	0.0471	0.0514	0.0644	0.0803	0.1148	0.1663	0.2469	0.341	0.4753	0.6486	0.8486	1.1102
	455	0.0356	0.04	0.0388	0.0401	0.0396	0.0465	0.0407	0.0399	0.0406	0.0423	0.0417	0.0457	0.0572	0.0687	0.0888	0.1322	0.1985	0.2617	0.3635	0.4868	0.6886	0.8617	1.0855	1.3671		455	0.0355	0.0389	0.0381	0.0392	0.0449	0.0429	0.0397	0.0397	0.0406	0.0414	0.0433	0.0466	0.056	0.0665	0.0905	0.1281	0.187	0.2581	0.3594	0.4969	0.6547	0.8651
	460	0.0351	0.0392	0.0364	0.0394	0.0382	0.0448	0.0386	0.0384	0.0394	0.0409	0.0388	0.0422	0.0504	0.0574	0.0705	0.0999	0.1477	0.1897	0.264	0.3532	0.5026	0.6321	0.8018	1.0115		460	0.0348	0.038	0.0374	0.0369	0.0427	0.041	0.0386	0.0386	0.0382	0.0391	0.0415	0.0419	0.0496	0.0561	0.0708	0.0951	0.1386	0.1883	0.2598	0.3616	0.4785	0.6347
	465	0.0361	0.039	0.0363	0.0389	0.037	0.0432	0.0369	0.037	0.0377	0.0398	0.0374	0.0385	0.0457	0.0496	0.0574	0.0795	0.1166	0.1464	0.1992	0.2655	0.3775	0.4756	0.6022	0.7627		465	0.035	0.0381	0.0363	0.036	0.0423	0.04	0.0377	0.0371	0.0373	0.0374	0.0398	0.0388	0.045	0.0486	0.0582	0.0752	0.1083	0.1435	0.1961	0.2719	0.3585	0.4766
	470	0.0361	0.0392	0.0361	0.0392	0.0356	0.0426	0.0358	0.0355	0.0367	0.0378	0.0354	0.0368	0.043	0.0441	0.048	0.0625	0.0908	0.1102	0.1469	0.1936	0.2742	0.3439	0.4339	0.5469		470	0.0357	0.0385	0.036	0.0342	0.0405	0.0393	0.0363	0.0361	0.0368	0.0364	0.0393	0.035	0.0416	0.0424	0.0472	0.0593	0.0844	0.1095	0.1456	0.1988	0.2604	0.3443
	475	0.0362	0.0385	0.0355	0.0383	0.0354	0.043	0.0365	0.036	0.0378	0.037	0.0351	0.036	0.0409	0.0419	0.0428	0.0529	0.0749	0.0863	0.1108	0.143	0.1971	0.2447	0.3073	0.3823		475	0.0351	0.038	0.0359	0.0364	0.0399	0.0381	0.0364	0.0359	0.0363	0.0354	0.0378	0.0345	0.04	0.0399	0.0422	0.0494	0.0691	0.0861	0.1087	0.1467	0.1867	0.2439
	480	0.0361	0.0373	0.0346	0.0368	0.0357	0.0411	0.0344	0.0347	0.0355	0.037	0.0339	0.034	0.039	0.0399	0.0379	0.0457	0.0627	0.068	0.0829	0.1048	0.1396	0.1728	0.2127	0.259		480	0.0341	0.0364	0.0357	0.0349	0.0403	0.0388	0.0352	0.0349	0.0354	0.0341	0.0361	0.0343	0.0375	0.0372	0.0377	0.0429	0.0574	0.0693	0.0815	0.1074	0.1351	0.1703
	485	0.0336	0.0355	0.0342	0.0354	0.0348	0.0407	0.0349	0.034	0.0348	0.0362	0.0335	0.0339	0.0373	0.0388	0.0371	0.0439	0.0526	0.0552	0.064	0.0783	0.0979	0.1201	0.1416	0.1713		485	0.0332	0.034	0.0338	0.0342	0.0391	0.0373	0.0348	0.0339	0.0344	0.0342	0.0355	0.0339	0.038	0.0366	0.0377	0.0393	0.0481	0.0546	0.0633	0.0805	0.096	0.1165
	490	0.0339	0.035	0.0334	0.0351	0.0343	0.0407	0.0348	0.0337	0.0345	0.036	0.0321	0.0318	0.0366	0.037	0.0348	0.0407	0.0481	0.0485	0.0544	0.0649	0.0786	0.0934	0.1053	0.1256		490	0.0332	0.0341	0.0338	0.0346	0.0393	0.0377	0.0341	0.0337	0.0339	0.0342	0.0345	0.0327	0.0361	0.0355	0.0349	0.0372	0.0429	0.0483	0.0537	0.0664	0.0765	0.0889
	495	0.034	0.0347	0.0327	0.0344	0.0336	0.0412	0.0343	0.0338	0.0344	0.0351	0.0313	0.0311	0.0354	0.0361	0.0327	0.038	0.0445	0.0435	0.0489	0.0543	0.0642	0.0741	0.0803	0.0918		495	0.0339	0.034	0.0339	0.0337	0.0391	0.0369	0.034	0.0333	0.0337	0.0333	0.0328	0.0315	0.0354	0.0339	0.0335	0.0343	0.04	0.0444	0.0477	0.0558	0.0627	0.0697
	500	0.036	0.0363	0.0354	0.0367	0.0351	0.0407	0.0353	0.0349	0.0352	0.0349	0.0318	0.0328	0.0362	0.0356	0.0323	0.0375	0.0437	0.0423	0.0459	0.0499	0.0553	0.0612	0.0649	0.0705		500	0.0349	0.0354	0.0356	0.0349	0.0407	0.0378	0.0343	0.0341	0.0342	0.0333	0.0346	0.032	0.0361	0.0345	0.0337	0.0338	0.0395	0.0425	0.0428	0.051	0.0533	0.0576
	505	0.034	0.0358	0.0338	0.0352	0.0339	0.0397	0.0346	0.0346	0.0346	0.0345	0.0308	0.0309	0.0351	0.0344	0.0316	0.0358	0.0418	0.0402	0.0426	0.0443	0.0479	0.0529	0.0537	0.0558		505	0.0327	0.0339	0.0344	0.0336	0.0405	0.0367	0.0348	0.0327	0.0341	0.0332	0.0332	0.0323	0.0358	0.0339	0.0319	0.0329	0.0378	0.0394	0.0401	0.0462	0.0465	0.0478
	510	0.0348	0.0354	0.0331	0.0342	0.0339	0.0404	0.034	0.0345	0.0349	0.0346	0.0325	0.0334	0.0369	0.0347	0.0319	0.0363	0.0398	0.0396	0.0399	0.0431	0.0447	0.0475	0.0478	0.0471		510	0.0335	0.0344	0.0343	0.0343	0.0403	0.0371	0.0346	0.0341	0.0344	0.0342	0.0347	0.0333	0.0343	0.0342	0.0332	0.0322	0.037	0.0389	0.0383	0.043	0.0441	0.0438
	515	0.0333	0.0344	0.0325	0.034	0.0336	0.0392	0.0341	0.0325	0.0335	0.0348	0.0318	0.0321	0.0354	0.0342	0.0315	0.035	0.0385	0.0379	0.0371	0.0397	0.0406	0.0434	0.0402	0.0416		515	0.0319	0.0329	0.0337	0.0323	0.0404	0.0358	0.0343	0.034	0.0337	0.0321	0.0345	0.0319	0.0346	0.0326	0.0324	0.032	0.0362	0.0369	0.0371	0.0406	0.0395	0.039
	520	0.0338	0.0339	0.0329	0.0343	0.0334	0.039	0.0333	0.0335	0.0339	0.0349	0.0319	0.0327	0.0363	0.0337	0.0323	0.036	0.0381	0.0368	0.037	0.0389	0.0395	0.0412	0.0388	0.0361		520	0.033	0.0333	0.033	0.0339	0.0403	0.0372	0.033	0.0335	0.0339	0.0325	0.0336	0.0324	0.0345	0.033	0.0334	0.0321	0.0359	0.0364	0.0356	0.0388	0.0381	0.0364
	525	0.0333	0.0351	0.0326	0.0342	0.0344	0.04	0.0343	0.0342	0.0354	0.0349	0.0317	0.0326	0.0364	0.0352	0.0325	0.0356	0.0382	0.0381	0.037	0.0399	0.0387	0.0413	0.0383	0.0358		525	0.0342	0.0343	0.0341	0.0333	0.0401	0.036	0.0343	0.0332	0.0337	0.0336	0.0347	0.0336	0.0357	0.033	0.0328	0.0323	0.0367	0.0378	0.0367	0.0396	0.0381	0.0372
	530	0.032	0.0334	0.0328	0.0343	0.034	0.04	0.035	0.0331	0.034	0.0349	0.0322	0.0322	0.0357	0.0345	0.0322	0.036	0.0383	0.0351	0.0354	0.038	0.0374	0.0391	0.0354	0.033		530	0.0318	0.0327	0.0327	0.0337	0.0389	0.0363	0.0326	0.0328	0.0341	0.0333	0.0349	0.033	0.0363	0.0331	0.0335	0.0333	0.0354	0.0348	0.0349	0.0383	0.037	0.0347
	535	0.0337	0.0339	0.0319	0.0348	0.0335	0.0398	0.0338	0.033	0.035	0.0339	0.0321	0.0322	0.0362	0.0354	0.0323	0.0356	0.0378	0.0355	0.0362	0.0378	0.0363	0.0383	0.0351	0.0329		535	0.034	0.0329	0.0341	0.0338	0.0397	0.0363	0.0331	0.0323	0.0347	0.0336	0.0338	0.0326	0.0354	0.0338	0.0327	0.032	0.0357	0.0354	0.0345	0.0384	0.0377	0.0342
	540	0.0354	0.0354	0.0341	0.0352	0.0329	0.0392	0.0335	0.034	0.0345	0.0353	0.0321	0.0323	0.0357	0.0345	0.0317	0.0344	0.037	0.0372	0.0363	0.0378	0.0374	0.0397	0.036	0.034		540	0.0335	0.0349	0.0345	0.0342	0.0399	0.0363	0.0342	0.0338	0.0336	0.0331	0.0347	0.0329	0.0359	0.033	0.0322	0.0319	0.0353	0.0369	0.0346	0.0384	0.0372	0.0362
	545	0.0329	0.0338	0.0324	0.0342	0.0327	0.0379	0.0328	0.0338	0.0336	0.0342	0.0322	0.0319	0.0349	0.0343	0.0312	0.034	0.0371	0.0356	0.035	0.0367	0.0362	0.0375	0.0345	0.0325		545	0.032	0.0331	0.0323	0.0334	0.0383	0.0361	0.0334	0.0334	0.0328	0.0328	0.0341	0.0326	0.0354	0.0315	0.0311	0.031	0.0344	0.0353	0.0351	0.0381	0.0349	0.034
	550	0.0324	0.0345	0.0328	0.034	0.0324	0.0384	0.0328	0.033	0.034	0.0339	0.0312	0.0306	0.0346	0.0336	0.0299	0.0332	0.0374	0.0349	0.0351	0.0368	0.036	0.0377	0.0346	0.0327		550	0.0327	0.0327	0.0344	0.0328	0.0392	0.0349	0.0342	0.0333	0.0334	0.0316	0.032	0.0321	0.0332	0.0319	0.0315	0.031	0.0356	0.0354	0.0346	0.0382	0.0353	0.0342
	555	0.0341	0.0346	0.0324	0.0338	0.0326	0.0389	0.0331	0.0336	0.0346	0.0343	0.0319	0.033	0.0344	0.0336	0.0315	0.0336	0.038	0.0363	0.0359	0.0372	0.0361	0.0388	0.0344	0.034		555	0.0334	0.0343	0.0345	0.0327	0.0392	0.0363	0.0342	0.034	0.034	0.0321	0.0336	0.0326	0.0341	0.0324	0.0316	0.0309	0.0356	0.036	0.0351	0.0383	0.0366	0.0348
	560	0.0331	0.0344	0.0328	0.0338	0.0334	0.0397	0.0337	0.0331	0.0337	0.0341	0.0315	0.0329	0.0349	0.0336	0.0314	0.0345	0.0384	0.037	0.0367	0.0369	0.0366	0.0391	0.036	0.0329		560	0.0356	0.0334	0.0337	0.0341	0.0392	0.0364	0.0336	0.0332	0.0345	0.0324	0.0335	0.0321	0.0338	0.0327	0.0323	0.0314	0.0352	0.0358	0.0343	0.0387	0.0363	0.0345
	565	0.0332	0.0357	0.0338	0.035	0.0336	0.0402	0.033	0.0351	0.0351	0.0346	0.0324	0.0334	0.0349	0.0346	0.0316	0.034	0.038	0.0371	0.0357	0.037	0.0364	0.0389	0.036	0.0331		565	0.0341	0.0354	0.0328	0.033	0.04	0.0359	0.0345	0.0348	0.0334	0.0328	0.035	0.032	0.0355	0.0326	0.032	0.0312	0.0354	0.0363	0.0352	0.0378	0.0376	0.0361
	570	0.033	0.0345	0.0337	0.0353	0.0345	0.0397	0.0334	0.0343	0.0342	0.0344	0.0317	0.0332	0.0351	0.0343	0.0311	0.0344	0.0377	0.0365	0.0362	0.0368	0.0369	0.0387	0.0349	0.0326		570	0.0335	0.0342	0.0339	0.0328	0.0391	0.0351	0.0342	0.0333	0.0336	0.0334	0.0343	0.0322	0.035	0.0325	0.0317	0.0317	0.0358	0.0355	0.0348	0.0386	0.0353	0.0354
	575	0.0343	0.0345	0.0345	0.0354	0.0347	0.0405	0.0346	0.0352	0.0361	0.0356	0.033	0.0332	0.0359	0.035	0.0323	0.0352	0.0374	0.038	0.0362	0.0384	0.0378	0.0387	0.0355	0.0338		575	0.0344	0.0343	0.0347	0.0343	0.0396	0.0367	0.0353	0.0346	0.0349	0.0339	0.0356	0.0339	0.0367	0.0341	0.0335	0.0327	0.0369	0.0377	0.0363	0.0391	0.0363	0.0356
	580	0.0318	0.0329	0.0326	0.0337	0.0329	0.0387	0.0333	0.0336	0.0332	0.0335	0.0311	0.0317	0.034	0.0328	0.0309	0.0334	0.0359	0.035	0.0349	0.036	0.0357	0.0369	0.0342	0.0327		580	0.0329	0.0326	0.0327	0.0333	0.038	0.0355	0.0317	0.034	0.0322	0.0309	0.0328	0.0314	0.0347	0.0317	0.0311	0.0306	0.035	0.035	0.0338	0.037	0.035	0.0325
	585	0.0333	0.0343	0.0326	0.0349	0.0327	0.0395	0.032	0.0346	0.0344	0.0342	0.0318	0.0338	0.0339	0.034	0.0308	0.0336	0.0368	0.0364	0.0356	0.0369	0.0364	0.0386	0.0348	0.0326		585	0.0346	0.0339	0.0345	0.0338	0.0387	0.0357	0.0336	0.0338	0.0342	0.0328	0.0351	0.0333	0.0344	0.0322	0.0306	0.0301	0.0352	0.0359	0.0345	0.0386	0.0365	0.0353
	590	0.0342	0.035	0.035	0.0357	0.035	0.0412	0.0343	0.0366	0.0357	0.0354	0.0338	0.0344	0.0371	0.0354	0.0328	0.0361	0.038	0.0377	0.0378	0.0387	0.0377	0.0408	0.0372	0.0348		590	0.0352	0.0354	0.0356	0.0345	0.0404	0.0386	0.0359	0.0358	0.0357	0.0343	0.0367	0.0338	0.0367	0.0349	0.0341	0.0336	0.0362	0.0378	0.0361	0.0397	0.0383	0.036
	595	0.0336	0.0343	0.0335	0.0348	0.0336	0.0396	0.0324	0.035	0.0348	0.0346	0.0324	0.0336	0.0361	0.0336	0.0318	0.0346	0.0372	0.0375	0.0364	0.0379	0.0369	0.0391	0.0351	0.0329		595	0.0337	0.0347	0.0342	0.0336	0.0389	0.0362	0.0346	0.0336	0.034	0.0336	0.035	0.0317	0.0349	0.0325	0.0322	0.0319	0.0362	0.0358	0.0351	0.0388	0.0365	0.0357
	600	0.0342	0.0342	0.0321	0.0345	0.0343	0.0404	0.0325	0.0345	0.0355	0.0339	0.0321	0.0341	0.0359	0.0345	0.0322	0.0354	0.0363	0.0363	0.0362	0.0372	0.0372	0.0385	0.0357	0.0328		600	0.0333	0.0322	0.0349	0.0333	0.0389	0.0376	0.0343	0.0336	0.0357	0.0338	0.0347	0.0322	0.0335	0.0333	0.0336	0.0322	0.0346	0.0352	0.0342	0.0393	0.0368	0.0354
	605	0.0317	0.0337	0.0332	0.0337	0.0338	0.0396	0.0327	0.0353	0.0353	0.0348	0.0327	0.0333	0.0353	0.0348	0.0316	0.0348	0.0357	0.0364	0.0358	0.0366	0.037	0.0382	0.0348	0.0338		605	0.0329	0.0336	0.0344	0.0337	0.0395	0.0369	0.0345	0.0328	0.0337	0.0341	0.0354	0.0325	0.0339	0.0335	0.0326	0.0319	0.0352	0.0352	0.0354	0.0385	0.0356	0.0358
	610	0.031	0.0325	0.0325	0.0337	0.0346	0.0398	0.0325	0.0338	0.0346	0.0339	0.0318	0.032	0.0343	0.0343	0.0306	0.0351	0.0363	0.0351	0.0348	0.0355	0.0363	0.0365	0.0343	0.0324		610	0.0325	0.0323	0.0339	0.0342	0.0374	0.0369	0.0327	0.0326	0.033	0.0334	0.0345	0.0314	0.0342	0.0336	0.0321	0.033	0.0342	0.0353	0.0345	0.0372	0.0343	0.0333
	615	0.033	0.0332	0.0331	0.0347	0.0351	0.04	0.0325	0.0345	0.0351	0.035	0.0313	0.0333	0.035	0.035	0.0306	0.0353	0.0375	0.0357	0.0366	0.0378	0.0378	0.0382	0.0352	0.0344		615	0.0337	0.033	0.0351	0.0335	0.0374	0.0376	0.0332	0.0344	0.0338	0.0339	0.0348	0.0326	0.0355	0.034	0.0326	0.0336	0.0355	0.0371	0.0353	0.0387	0.0359	0.035
	620	0.0312	0.0329	0.0318	0.0329	0.0344	0.0386	0.0316	0.033	0.0332	0.0334	0.0304	0.0326	0.0345	0.0331	0.0295	0.0328	0.0353	0.0363	0.0358	0.0367	0.037	0.0374	0.0356	0.0341		620	0.0333	0.0335	0.033	0.0322	0.0372	0.0357	0.0332	0.0333	0.0329	0.0332	0.0348	0.0316	0.0337	0.032	0.0314	0.0311	0.0341	0.0346	0.0339	0.0382	0.0352	0.0336
	625	0.0311	0.0341	0.032	0.0328	0.0329	0.0388	0.0313	0.0333	0.0343	0.0343	0.0304	0.0327	0.0345	0.0342	0.0304	0.0326	0.0351	0.0369	0.0363	0.0372	0.0366	0.0379	0.0367	0.0331		625	0.032	0.0327	0.0332	0.0323	0.0375	0.0357	0.033	0.0323	0.0322	0.0332	0.0346	0.0318	0.0332	0.0329	0.0315	0.0308	0.0352	0.0353	0.0346	0.0377	0.0361	0.0348
	630	0.0313	0.0329	0.0326	0.0334	0.0337	0.0393	0.0317	0.0334	0.0348	0.0345	0.031	0.0334	0.0354	0.0343	0.0319	0.0337	0.0357	0.0356	0.0347	0.036	0.0361	0.0378	0.0357	0.0332		630	0.0316	0.0328	0.0329	0.0317	0.0385	0.0359	0.0324	0.0321	0.033	0.0337	0.0356	0.032	0.0338	0.0334	0.0331	0.0309	0.0348	0.0356	0.0351	0.0376	0.0367	0.034
	635	0.0304	0.0322	0.0314	0.0341	0.0328	0.0388	0.032	0.0329	0.0336	0.0327	0.0315	0.0331	0.0342	0.0334	0.0291	0.0321	0.0358	0.0347	0.0355	0.037	0.0359	0.0372	0.0345	0.0333		635	0.0315	0.0328	0.0335	0.0315	0.0368	0.0355	0.0325	0.032	0.0324	0.0325	0.0351	0.0317	0.0325	0.033	0.0318	0.0305	0.0344	0.0363	0.034	0.0373	0.0356	0.0336
	640	0.032	0.034	0.0319	0.0331	0.0342	0.0398	0.0331	0.0333	0.0359	0.0352	0.0322	0.0336	0.0368	0.0356	0.0315	0.0345	0.0373	0.0357	0.0362	0.0376	0.0383	0.038	0.0355	0.0334		640	0.0327	0.0329	0.0338	0.0324	0.0372	0.0366	0.0336	0.0327	0.033	0.0339	0.0342	0.0326	0.0355	0.0336	0.0332	0.0332	0.0352	0.0357	0.0359	0.0383	0.0358	0.0357
	645	0.0306	0.0333	0.0323	0.0342	0.0335	0.0394	0.0331	0.0343	0.0346	0.0339	0.0327	0.0351	0.0364	0.0345	0.0305	0.0332	0.037	0.0367	0.0374	0.0376	0.0383	0.0378	0.035	0.0343		645	0.0324	0.0334	0.0331	0.0317	0.0368	0.0362	0.0344	0.0329	0.0341	0.0338	0.0356	0.0326	0.0341	0.0339	0.0325	0.0321	0.0349	0.0366	0.036	0.0387	0.0367	0.0348
	650	0.0304	0.0335	0.0303	0.0319	0.034	0.0377	0.0308	0.034	0.0324	0.0335	0.0305	0.033	0.0331	0.0343	0.0294	0.0314	0.0354	0.0355	0.0361	0.036	0.0351	0.038	0.0347	0.033		650	0.0316	0.0323	0.0312	0.0313	0.0365	0.0349	0.0315	0.0318	0.0318	0.033	0.0342	0.0321	0.0327	0.0326	0.0312	0.0307	0.0346	0.0347	0.035	0.0379	0.0345	0.034
	655	0.031	0.0334	0.0313	0.0338	0.0332	0.0378	0.0314	0.0341	0.0341	0.0333	0.031	0.0344	0.035	0.0342	0.0295	0.0329	0.0351	0.036	0.0354	0.0367	0.0359	0.0389	0.0345	0.0335		655	0.0333	0.0329	0.0334	0.0317	0.0363	0.0354	0.0321	0.032	0.033	0.0338	0.0355	0.0342	0.0342	0.0322	0.0322	0.0323	0.0351	0.0354	0.0348	0.0379	0.0359	0.0343
	660	0.0304	0.0327	0.0313	0.0333	0.0335	0.0389	0.0312	0.0341	0.0335	0.0333	0.0315	0.0335	0.0358	0.0348	0.0313	0.0337	0.0351	0.0357	0.0349	0.0352	0.0361	0.0373	0.0346	0.033		660	0.0313	0.0325	0.0331	0.0324	0.0359	0.0361	0.0324	0.0323	0.0329	0.033	0.0352	0.0323	0.0352	0.0335	0.0329	0.0327	0.0359	0.0352	0.0341	0.0371	0.0362	0.0334
	665	0.0319	0.0341	0.0314	0.0331	0.0346	0.0398	0.0326	0.0341	0.034	0.034	0.0317	0.0338	0.0358	0.0352	0.0309	0.0348	0.0361	0.0353	0.0362	0.0366	0.0373	0.0381	0.035	0.033		665	0.033	0.0325	0.0333	0.0322	0.0361	0.0368	0.0325	0.0325	0.0326	0.0341	0.0349	0.0332	0.0353	0.034	0.0332	0.0324	0.0358	0.0356	0.0355	0.0377	0.0349	0.0341
	670	0.0313	0.0336	0.0325	0.0336	0.0344	0.0383	0.032	0.0342	0.0336	0.0335	0.0314	0.034	0.036	0.0349	0.0311	0.0333	0.0364	0.0366	0.036	0.0359	0.0374	0.0376	0.035	0.0334		670	0.0321	0.0329	0.0327	0.0334	0.0371	0.0358	0.0328	0.0324	0.0324	0.033	0.0351	0.0329	0.0337	0.0336	0.032	0.0324	0.0346	0.0357	0.0349	0.0369	0.0358	0.0343
	675	0.0304	0.033	0.0314	0.0329	0.0332	0.0382	0.0326	0.0325	0.0333	0.0329	0.0319	0.0329	0.0357	0.0348	0.031	0.0339	0.0368	0.0355	0.0355	0.0352	0.0372	0.0379	0.0344	0.0341		675	0.032	0.0325	0.0326	0.0321	0.0357	0.0367	0.032	0.0313	0.0334	0.0326	0.0349	0.0332	0.0345	0.0336	0.0319	0.0324	0.0342	0.0357	0.0345	0.0372	0.0361	0.0347
	680	0.0304	0.0337	0.0312	0.0329	0.0338	0.0377	0.0307	0.033	0.033	0.0326	0.0308	0.0331	0.0357	0.0346	0.0307	0.0335	0.0367	0.035	0.0355	0.0357	0.0372	0.0387	0.035	0.0334		680	0.0318	0.032	0.031	0.0309	0.0354	0.0359	0.0319	0.0311	0.0323	0.0329	0.0353	0.0323	0.0345	0.0331	0.0328	0.0322	0.035	0.0353	0.0337	0.0374	0.0352	0.034
	685	0.0314	0.0334	0.0307	0.0328	0.0341	0.0393	0.0322	0.0338	0.0326	0.0338	0.0317	0.034	0.0356	0.0352	0.0322	0.035	0.0367	0.0352	0.0357	0.0373	0.0374	0.0378	0.036	0.0332		685	0.0331	0.0319	0.0327	0.032	0.0362	0.0359	0.0324	0.032	0.0329	0.0338	0.0349	0.0329	0.0354	0.034	0.0331	0.0323	0.0354	0.0351	0.0353	0.0376	0.036	0.035
	690	0.0303	0.0335	0.0296	0.0322	0.0332	0.0382	0.0309	0.0331	0.0322	0.0328	0.0307	0.0342	0.0346	0.0345	0.03	0.0321	0.0347	0.0358	0.0353	0.0362	0.0372	0.0384	0.0353	0.0333		690	0.0305	0.0319	0.0316	0.0315	0.0352	0.035	0.0315	0.032	0.0316	0.0324	0.0335	0.0326	0.0334	0.0327	0.0317	0.0307	0.0358	0.0352	0.0337	0.0379	0.0354	0.0348
	695	0.0308	0.0316	0.0302	0.0323	0.0322	0.0371	0.0309	0.0323	0.0313	0.0326	0.0308	0.0334	0.0352	0.0338	0.0302	0.0324	0.0343	0.0352	0.036	0.0365	0.0359	0.038	0.0343	0.0324		695	0.0307	0.0326	0.0313	0.0322	0.0354	0.0344	0.0325	0.031	0.0315	0.0325	0.0352	0.0318	0.0338	0.0323	0.0319	0.0303	0.0342	0.0349	0.0336	0.0363	0.0356	0.034
	700	0.0304	0.0334	0.0308	0.0327	0.0337	0.0389	0.033	0.0333	0.0324	0.0334	0.0321	0.0337	0.0361	0.0361	0.0316	0.0361	0.0371	0.0364	0.0364	0.0372	0.037	0.0387	0.0339	0.0332		700	0.0322	0.0313	0.0321	0.0323	0.0365	0.0358	0.0329	0.0324	0.0336	0.0349	0.0358	0.0337	0.0337	0.0348	0.0336	0.0335	0.0356	0.0363	0.0352	0.0362	0.0363	0.0345
	705	0.0322	0.0341	0.033	0.0341	0.0356	0.0404	0.0342	0.0351	0.0349	0.0351	0.0338	0.0367	0.0375	0.0373	0.0342	0.0373	0.0384	0.0369	0.0375	0.0384	0.0386	0.0387	0.036	0.0351		705	0.0326	0.0323	0.0336	0.0335	0.0377	0.0373	0.0339	0.0344	0.0349	0.0356	0.0379	0.0357	0.0371	0.0363	0.0351	0.0347	0.0364	0.0363	0.0368	0.0383	0.0377	0.0352
	710	0.0309	0.0327	0.0298	0.0322	0.0323	0.0366	0.0308	0.0323	0.0311	0.0325	0.0301	0.0331	0.0356	0.0349	0.0307	0.0314	0.0349	0.0356	0.036	0.037	0.037	0.0384	0.0356	0.033		710	0.0309	0.0322	0.0311	0.0313	0.0358	0.0346	0.0316	0.0307	0.0315	0.0332	0.0348	0.0318	0.0354	0.0332	0.0316	0.0312	0.0347	0.0344	0.036	0.0383	0.0349	0.0356
	715	0.0296	0.0337	0.0302	0.0321	0.0328	0.0364	0.0305	0.0323	0.0304	0.0317	0.0305	0.0325	0.0352	0.0349	0.0305	0.0329	0.0362	0.0362	0.036	0.0373	0.0377	0.0394	0.036	0.0344		715	0.0304	0.0324	0.0325	0.0325	0.0358	0.0345	0.032	0.0313	0.0322	0.0325	0.0341	0.0322	0.0353	0.0334	0.0312	0.0308	0.0348	0.0353	0.0358	0.0382	0.0353	0.0364
	720	0.0332	0.0335	0.0328	0.0344	0.0349	0.0389	0.0324	0.0344	0.0333	0.035	0.0321	0.0357	0.0374	0.0368	0.0325	0.0346	0.0376	0.0386	0.0379	0.0382	0.0396	0.0407	0.0374	0.0359		720	0.0321	0.0345	0.0334	0.0338	0.0368	0.0365	0.0333	0.0322	0.0337	0.035	0.0363	0.0348	0.0357	0.0346	0.0338	0.0329	0.0362	0.0376	0.0378	0.0399	0.0376	0.0377
	725	0.0323	0.0336	0.0305	0.033	0.0342	0.0381	0.0322	0.0334	0.0325	0.0342	0.0317	0.0348	0.0347	0.0363	0.0313	0.0349	0.0366	0.0374	0.039	0.0381	0.0384	0.0402	0.0369	0.0358		725	0.0332	0.0343	0.0338	0.0319	0.0371	0.0357	0.0336	0.0325	0.0326	0.0347	0.0361	0.0342	0.035	0.0346	0.0332	0.0335	0.0355	0.0368	0.0373	0.0395	0.0381	0.0387
	730	0.0352	0.0358	0.0338	0.0361	0.0373	0.0416	0.0361	0.036	0.0352	0.0377	0.0347	0.0374	0.0374	0.0385	0.0347	0.0383	0.0396	0.038	0.0395	0.0401	0.0415	0.0413	0.0391	0.0374		730	0.0352	0.0364	0.0355	0.0357	0.0394	0.0386	0.0355	0.0353	0.0356	0.0372	0.0389	0.0368	0.038	0.0371	0.0378	0.0352	0.038	0.039	0.0383	0.0413	0.0394	0.0396
	735	0.0371	0.0378	0.0355	0.0376	0.0397	0.0442	0.0391	0.0392	0.0379	0.0394	0.0365	0.0395	0.041	0.0418	0.0374	0.0401	0.042	0.0415	0.0414	0.0426	0.0424	0.0446	0.0396	0.0383		735	0.0365	0.0365	0.0383	0.0368	0.0422	0.0415	0.0375	0.0371	0.0386	0.0388	0.041	0.0395	0.0407	0.0398	0.0388	0.0382	0.041	0.0397	0.0406	0.0429	0.042	0.0405
	740	0.0391	0.0398	0.0374	0.0389	0.041	0.0452	0.0393	0.0398	0.0397	0.0406	0.0391	0.0416	0.0424	0.0427	0.0393	0.0427	0.0416	0.0423	0.0412	0.0436	0.0433	0.0458	0.0427	0.0402		740	0.0375	0.0386	0.0383	0.0386	0.0444	0.0424	0.0395	0.0376	0.0394	0.0406	0.0426	0.0405	0.0418	0.0415	0.0413	0.0396	0.0423	0.0415	0.0423	0.0448	0.0434	0.0423
	745	0.0378	0.0408	0.0367	0.039	0.0414	0.0472	0.04	0.0411	0.0399	0.0421	0.0381	0.0413	0.0429	0.0427	0.04	0.0426	0.043	0.0439	0.0427	0.0439	0.0438	0.0456	0.044	0.0417		745	0.0394	0.0393	0.0386	0.0394	0.0445	0.0425	0.0409	0.0394	0.0399	0.0414	0.0427	0.0419	0.0411	0.0427	0.041	0.0395	0.043	0.0428	0.0431	0.0454	0.0442	0.0429
	750	0.04	0.0411	0.0377	0.041	0.0424	0.0477	0.0413	0.0419	0.0408	0.0426	0.0391	0.0434	0.0426	0.0446	0.0398	0.044	0.0443	0.0457	0.0443	0.0449	0.0457	0.0465	0.0448	0.0437		750	0.0408	0.0401	0.0399	0.0406	0.0456	0.0441	0.041	0.0403	0.0415	0.0431	0.0428	0.0434	0.0431	0.0435	0.0425	0.0406	0.0454	0.0447	0.0437	0.0458	0.0454	0.0439
	755	0.0396	0.0415	0.0377	0.0405	0.0424	0.0472	0.0413	0.0411	0.0393	0.0424	0.0391	0.0436	0.0434	0.0445	0.0405	0.043	0.0443	0.0452	0.0444	0.0454	0.0464	0.0472	0.0446	0.0432		755	0.0403	0.0402	0.0395	0.0412	0.0462	0.0448	0.0411	0.0398	0.042	0.0429	0.0441	0.0434	0.0433	0.0425	0.0419	0.0403	0.0445	0.0438	0.0437	0.0477	0.0457	0.0427
	760	0.0391	0.0396	0.0358	0.0391	0.0419	0.0463	0.0406	0.0409	0.0385	0.0419	0.0383	0.0415	0.0415	0.043	0.0391	0.0426	0.0432	0.0434	0.042	0.0454	0.0439	0.0458	0.0425	0.0423		760	0.0378	0.0382	0.0378	0.0389	0.0447	0.0428	0.0396	0.0391	0.0398	0.0413	0.0422	0.0411	0.0416	0.0416	0.0427	0.0397	0.0431	0.0427	0.0435	0.0459	0.044	0.0423
	765	0.0389	0.0408	0.0374	0.0396	0.0424	0.0476	0.0415	0.041	0.0387	0.0429	0.0384	0.0441	0.0438	0.0436	0.0394	0.0436	0.045	0.0436	0.0438	0.0456	0.0453	0.0463	0.0431	0.0422		765	0.0394	0.0393	0.0387	0.041	0.046	0.0441	0.0407	0.0398	0.041	0.0425	0.0435	0.0419	0.0421	0.0432	0.041	0.0401	0.0426	0.0425	0.044	0.0452	0.0449	0.043
	770	0.0381	0.041	0.0373	0.0396	0.0423	0.0462	0.0407	0.0422	0.039	0.0417	0.0389	0.0425	0.0436	0.0435	0.0404	0.0438	0.0456	0.044	0.0444	0.0444	0.044	0.0473	0.0433	0.0422		770	0.0381	0.0398	0.0398	0.0391	0.0446	0.0439	0.0409	0.0396	0.042	0.0425	0.0436	0.0427	0.0434	0.0431	0.0422	0.0403	0.0432	0.0433	0.0439	0.0461	0.0453	0.0425
	775	0.0404	0.0407	0.0382	0.0409	0.044	0.0475	0.0415	0.0423	0.0389	0.0435	0.04	0.0436	0.0434	0.0442	0.0404	0.0445	0.0452	0.0466	0.0453	0.0451	0.0446	0.0473	0.0451	0.044		775	0.0394	0.0404	0.04	0.0411	0.046	0.0444	0.0408	0.0401	0.0426	0.043	0.0436	0.042	0.0442	0.0434	0.042	0.0412	0.0449	0.0453	0.0444	0.0467	0.0456	0.045
	780	0.0387	0.0397	0.036	0.0406	0.0426	0.0462	0.0409	0.0403	0.0391	0.0414	0.0395	0.0428	0.0434	0.0442	0.0408	0.0441	0.0441	0.0449	0.0442	0.0448	0.0448	0.0471	0.0437	0.0431		780	0.0401	0.0395	0.0396	0.0403	0.0453	0.0439	0.0404	0.0399	0.0405	0.0431	0.043	0.0427	0.0442	0.0431	0.0423	0.0407	0.0432	0.0449	0.045	0.0466	0.0452	0.0441
	785	0.0388	0.0393	0.0361	0.0395	0.0433	0.0472	0.0404	0.0397	0.039	0.0421	0.0381	0.0429	0.0419	0.044	0.039	0.0437	0.0426	0.0457	0.0441	0.0456	0.0455	0.0477	0.0441	0.0437		785	0.0391	0.0395	0.0381	0.0404	0.0453	0.0434	0.0404	0.0386	0.0401	0.042	0.0424	0.0418	0.0435	0.0435	0.0412	0.0402	0.0432	0.0436	0.0444	0.0473	0.044	0.0433
	790	0.0388	0.0394	0.0355	0.0404	0.0429	0.0463	0.0403	0.0402	0.039	0.0417	0.0383	0.0414	0.0418	0.044	0.0384	0.0432	0.0428	0.044	0.0439	0.0452	0.0452	0.047	0.0432	0.0426		790	0.0372	0.0394	0.0373	0.0403	0.0441	0.0434	0.04	0.04	0.0394	0.0427	0.0415	0.0407	0.0431	0.0422	0.0412	0.0393	0.0433	0.0426	0.0428	0.0462	0.0447	0.0437
	795	0.0388	0.0387	0.0355	0.0407	0.0419	0.0465	0.0406	0.0404	0.0377	0.041	0.0377	0.0422	0.0421	0.0441	0.0393	0.0434	0.043	0.044	0.0441	0.045	0.0447	0.0466	0.0432	0.0417		795	0.0383	0.0383	0.0383	0.0402	0.045	0.0433	0.0398	0.0382	0.04	0.0416	0.0436	0.0411	0.0428	0.0418	0.0412	0.0405	0.0435	0.0427	0.0427	0.0457	0.0449	0.0436
	800	0.0376	0.0383	0.0336	0.0374	0.041	0.0462	0.0393	0.0389	0.0366	0.0399	0.0375	0.0408	0.0408	0.0415	0.0376	0.0431	0.0422	0.0432	0.0417	0.0433	0.0422	0.045	0.0415	0.0412		800	0.036	0.0372	0.0375	0.0385	0.0438	0.0418	0.0392	0.0387	0.0389	0.0408	0.0409	0.0397	0.0408	0.0407	0.0407	0.0389	0.0418	0.0414	0.0427	0.0441	0.0434	0.0426
[truncated: 27 more columns]

[truncated: 6 more sheets: Figure S1_inset_2_2_5_mM, Figure S1_inset_4_5_mM, Figure S1_inset_9_mM, Figure S1_inset_18_mM, Table S1, Figure S5]
